# Supplementary material for: Initial description of primate-specific cystine-knot Prometheus genes and differential gene expansions of D-dopachrome tautomerase genes
Source: PubMed Central journal article supplement — Meta Gene. 2015 Apr 25;4:118–28. doi: 10.1016/j.mgene.2015.02.005 (PMC4412970; doi:10.1016/j.mgene.2015.02.005), 2015-04-25
Supplement: mmc1.pdf [file mmc1.pdf]

**Supplementary data file 1: Gene data set of eutherian adenohipophysis cystine-knot genes.**

| Superordinal clade | Order    | Species <sup>a</sup> | Genome assembly <sup>b</sup> | Gene number | Gene         | Genomic coordinates <sup>c</sup>                                                                                  | GenBank ID |
|--------------------|----------|----------------------|------------------------------|-------------|--------------|-------------------------------------------------------------------------------------------------------------------|------------|
| Euarchontoglires   | Primates | Human                | GRCh37 (>7)                  | 15          | <i>PREA1</i> | exon 1: ch.17: 16753333-16753779 bp                                                                               | HF564658   |
|                    |          |                      |                              |             | <i>PREA2</i> | exon 1: ch.17: 18325583-18326029 bp                                                                               | HF564659   |
|                    |          |                      |                              |             | <i>PREA3</i> | exon 1: ch.17: 20425007-20425453 bp                                                                               | HF564660   |
|                    |          |                      |                              |             | <i>PREB</i>  | exon 1: ch.17: 39784955-39785401 bp                                                                               | HF564661   |
|                    |          |                      |                              |             | <i>GPB5</i>  | exon 1: ch.14: 63784361-63784563 bp<br>exon 2: ch.14: 63779642-63779830 bp                                        | HF564662   |
|                    |          |                      |                              |             | <i>TSHB</i>  | exon 1: ch.1: 115575984-115576145 bp<br>exon 2: ch.1: 115576594-115576848 bp                                      | HF564663   |
|                    |          |                      |                              |             | <i>FSHB</i>  | exon 1: ch.11: 30253450-30253608 bp<br>exon 2: ch.11: 30255117-30255347 bp                                        | HF564664   |
|                    |          |                      |                              |             | <i>LHB</i>   | exon 1: ch.19: 49520324-49520338 bp<br>exon 2: ch.19: 49519804-49519971 bp<br>exon 3: ch.19: 49519325-49519567 bp | HF564665   |
|                    |          |                      |                              |             | <i>CGB1</i>  | exon 1: ch.19: 49535394-49535408 bp<br>exon 2: ch.19: 49535761-49535928 bp<br>exon 3: ch.19: 49536164-49536478 bp | HF564666   |
|                    |          |                      |                              |             | <i>CGB2</i>  | exon 1: ch.19: 49539913-49539927 bp<br>exon 2: ch.19: 49539393-49539560 bp<br>exon 3: ch.19: 49538867-49539157 bp | HF564667   |
|                    |          |                      |                              |             | <i>CGB3</i>  | exon 1: ch.19: 49547467-49547481 bp<br>exon 2: ch.19: 49547834-49548001 bp<br>exon 3: ch.19: 49548237-49548551 bp | HF564668   |
|                    |          |                      |                              |             | <i>CGB4</i>  | exon 1: ch.19: 49551982-49551996 bp<br>exon 2: ch.19: 49551462-49551629 bp<br>exon 3: ch.19: 49550912-49551226 bp | HF564669   |
|                    |          |                      |                              |             | <i>CGB5</i>  | exon 1: ch.19: 49558618-49558632 bp<br>exon 2: ch.19: 49558098-49558265 bp<br>exon 3: ch.19: 49557548-49557862 bp | HF564670   |
|                    |          |                      |                              |             | <i>GPA1</i>  | exon 1: ch.6: 87797831-87797918 bp                                                                                | HF564671   |

|  |                   |                 |   |              |                                                                                                                   |          |
|--|-------------------|-----------------|---|--------------|-------------------------------------------------------------------------------------------------------------------|----------|
|  |                   |                 |   |              | exon 2: ch.6: 87795968-87796152 bp<br>exon 3: ch.6: 87795474-87795551 bp                                          |          |
|  |                   |                 |   | <i>GPA2</i>  | exon 1: ch.11: 64702830-64702932 bp<br>exon 2: ch.11: 64702463-64702647 bp<br>exon 3: ch.11: 64702245-64702346 bp | HF564672 |
|  |                   |                 |   | putative     | exon 1: ch.19: 49527214-49527228 bp<br>exon 2: ch.19: 49526693-49526860 bp<br>exon 3: ch.19: 49526143-49526457 bp | -        |
|  | Common chimpanzee | CHIMP2.1.4 (6)  | 8 | <i>PREAI</i> | exon 1: ch.17: 39117698-39118144 bp                                                                               | HF564673 |
|  |                   |                 |   | <i>PREB</i>  | exon 1: ch.17: 15769374-15769820 bp                                                                               | HF564674 |
|  |                   |                 |   | <i>GPB5</i>  | exon 1: ch.14: 62382636-62382839 bp<br>exon 2: ch.14: 62377887-62378075 bp                                        | HF564675 |
|  |                   |                 |   | <i>FSHB</i>  | exon 1: ch.11: 30152100-30152258 bp<br>exon 2: ch.11: 30153768-30153998 bp                                        | HF564676 |
|  |                   |                 |   | <i>LHB</i>   | exon 1: ch.19: 53998897-53998911 bp<br>exon 2: ch.19: 53998377-53998544 bp<br>exon 3: ch.19: 53997898-53998140 bp | HF564677 |
|  |                   |                 |   | <i>CGB1</i>  | exon 1: ch.19: 54005906-54005920 bp<br>exon 2: ch.19: 54005386-54005553 bp<br>exon 3: ch.19: 54004836-54005150 bp | HF564678 |
|  |                   |                 |   | <i>GPA1</i>  | exon 1: ch.6: 87685380-87685467 bp<br>exon 2: ch.6: 87683517-87683701 bp<br>exon 3: ch.6: 87683020-87683097 bp    | HF564679 |
|  |                   |                 |   | <i>GPA2</i>  | exon 1: ch.11: 62862514-62862616 bp<br>exon 2: ch.11: 62862143-62862327 bp<br>exon 3: ch.11: 62861925-62862026 bp | HF564680 |
|  |                   |                 |   | putative     | exon 1: ch.19: 54020202-54020216 bp<br>exon 2: ch.19: 54019682-54019849 bp<br>exon 3: ch.19: 54019132-54019446 bp | -        |
|  | Western gorilla   | gorGor3.1 (2.1) | 1 | <i>GPA2</i>  | exon 1: ch.11: 61930562-61930664 bp<br>exon 2: ch.11: 61930191-61930375 bp<br>exon 3: ch.11: 61929973-61930074 bp | HF564681 |
|  |                   |                 |   | putative     | exon 1: ch.5: 42505342-42505788 bp                                                                                | -        |
|  |                   |                 |   | putative     | exon 1: ch.14: 44405560-44405763 bp                                                                               | -        |

|  |  |                    |                      |          |                                                                                                                   |                                                                                                                               |
|--|--|--------------------|----------------------|----------|-------------------------------------------------------------------------------------------------------------------|-------------------------------------------------------------------------------------------------------------------------------|
|  |  |                    |                      |          | exon 2: ch.14: 44400843-44401031 bp                                                                               |                                                                                                                               |
|  |  |                    |                      | putative | exon 1: ch.1: 118303132-118303293 bp<br>exon 2: ch.1: 118303742-118303996 bp                                      | -                                                                                                                             |
|  |  |                    |                      | putative | exon 1: ch.11: 30741459-30741617 bp<br>exon 2: ch.11: 30743128-30743358 bp                                        | -                                                                                                                             |
|  |  |                    |                      | putative | exon 1: ch.19: 46533724-46533738 bp<br>exon 2: ch.19: 46533205-46533372 bp<br>exon 3: ch.19: 46532655-46532969 bp | -                                                                                                                             |
|  |  |                    |                      | putative | exon 1: ch.6: 87300201-87300288 bp<br>exon 2: ch.6: 87298340-87298524 bp<br>exon 3: ch.6: 87297851-87297928 bp    | -                                                                                                                             |
|  |  | Sumatran orangutan | P_pygmaeus_2.0.2 (6) | 9        | <i>PREA1</i>                                                                                                      | exon 1: ch.17: 5073451-5073897 bp<br>HF564682                                                                                 |
|  |  |                    |                      |          | <i>PREB</i>                                                                                                       | exon 1: ch.17: 47836929-47837363 bp<br>HF564683                                                                               |
|  |  |                    |                      |          | <i>GPB5</i>                                                                                                       | exon 1: ch.14: 64168176-64168379 bp<br>exon 2: ch.14: 64163427-64163615 bp<br>HF564684                                        |
|  |  |                    |                      |          | <i>FSHB</i>                                                                                                       | exon 1: ch.11: 39232757-39232915 bp<br>exon 2: ch.11: 39231011-39231241 bp<br>HF564685                                        |
|  |  |                    |                      |          | <i>CGB1</i>                                                                                                       | exon 1: ch.19: 50578122-50578136 bp<br>exon 2: ch.19: 50577602-50577769 bp<br>exon 3: ch.19: 50577052-50577366 bp<br>HF564686 |
|  |  |                    |                      |          | <i>CGB2</i>                                                                                                       | exon 1: ch.19: 50586334-50586348 bp<br>exon 2: ch.19: 50586702-50586869 bp<br>exon 3: ch.19: 50587105-50587419 bp<br>HF564687 |
|  |  |                    |                      |          | <i>CGB3</i>                                                                                                       | exon 1: ch.19: 50603985-50603999 bp<br>exon 2: ch.19: 50603465-50603632 bp<br>exon 3: ch.19: 50602915-50603229 bp<br>HF564688 |
|  |  |                    |                      |          | <i>GPA1</i>                                                                                                       | exon 1: ch.6: 88022432-88022519 bp<br>exon 2: ch.6: 88020571-88020755 bp<br>exon 3: ch.6: 88020046-88020123 bp<br>HF564689    |
|  |  |                    |                      |          | <i>GPA2</i>                                                                                                       | exon 1: ch.11: 11014633-11014736 bp<br>exon 2: ch.11: 11014926-11015111 bp<br>exon 3: ch.11: 11015229-11015330 bp<br>HF564690 |
|  |  |                    |                      |          | putative                                                                                                          | exon 1: ch.1: 113147410-113147571 bp<br>exon 2: ch.1: 113146708-113146962 bp<br>-                                             |

|  |  |                               |                   |   |              |                                                                                                                                  |          |
|--|--|-------------------------------|-------------------|---|--------------|----------------------------------------------------------------------------------------------------------------------------------|----------|
|  |  |                               |                   |   | putative     | exon 1: ch.19: 50590904-50590918 bp<br>exon 2: ch.19: 50590384-50590551 bp<br>exon 3: ch.19: 50589834-50590148 bp                | -        |
|  |  |                               |                   |   | putative     | exon 1: ch.19: 50597540-50597554 bp<br>exon 2: ch.19: 50597020-50597187 bp<br>exon 3: ch.19: 50596470-50596784 bp                | -        |
|  |  | Northern white-cheeked gibbon | Nleu1.1 (5.6)     | 3 | <i>PREAI</i> | exon 1: GL397365.1: 149975-150421 bp                                                                                             | HF564691 |
|  |  |                               |                   |   | <i>FSHB</i>  | exon 1: GL397264.1: 44715761-44715919 bp<br>exon 2: GL397264.1: 44717434-44717664 bp                                             | HF564692 |
|  |  |                               |                   |   | <i>GPAI</i>  | exon 1: GL397273.1: 21469066-21469156 bp<br>exon 2: GL397273.1: 21467197-21467381 bp<br>exon 3: GL397273.1: 21466695-21466772 bp | HF564693 |
|  |  |                               |                   |   | putative     | exon 1: GL404692.1: 2670-3116 bp                                                                                                 | -        |
|  |  |                               |                   |   | putative     | exon 1: GL397313.1: 10430486-10430647 bp<br>exon 2: GL397313.1: 10431096-10431350 bp                                             | -        |
|  |  |                               |                   |   | putative     | exon 1: GL397326.1: 989004-989018 bp<br>exon 2: GL397326.1: 988484-988651 bp<br>exon 3: GL397326.1: 987937-988248 bp             | -        |
|  |  |                               |                   |   | putative     | exon 1: GL401012.1: 2960-2974 bp<br>exon 2: GL401012.1: 2294-2461 bp<br>exon 3: GL401012.1: 1747-2058 bp                         | -        |
|  |  |                               |                   |   | putative     | exon 1: GL397360.1: 3903457-3903559 bp<br>exon 2: GL397360.1: 3903086-3903270 bp<br>exon 3: GL397360.1: 3902861-3902962 bp       | -        |
|  |  | Rhesus monkey                 | Mmul_051212 (5.3) | 7 | <i>PREB</i>  | exon 1: ch.16: 51722158-51722604 bp                                                                                              | HF564694 |
|  |  |                               |                   |   | <i>GPB5</i>  | exon 1: ch.7: 126307906-126308109 bp<br>exon 2: ch.7: 126303395-126303583 bp                                                     | HF564695 |
|  |  |                               |                   |   | <i>TSHB</i>  | exon 1: ch.1: 118011322-118011483 bp<br>exon 2: ch.1: 118011931-118012185 bp                                                     | HF564696 |
|  |  |                               |                   |   | <i>FSHB</i>  | exon 1: ch.14: 41546023-41546181 bp<br>exon 2: ch.14: 41544285-41544515 bp                                                       | HF564697 |
|  |  |                               |                   |   | <i>LHB</i>   | exon 1: ch.19: 55300861-55300875 bp<br>exon 2: ch.19: 55300341-55300508 bp<br>exon 3: ch.19: 55299791-55300106 bp                | HF564698 |

|  |  |                  |                      |   |             |                                                                                                                                                             |          |
|--|--|------------------|----------------------|---|-------------|-------------------------------------------------------------------------------------------------------------------------------------------------------------|----------|
|  |  |                  |                      |   | <i>CGB1</i> | exon 1: ch.19: 55328889-55328903 bp<br>exon 2: ch.19: 55328370-55328537 bp<br>exon 3: ch.19: 55327821-55328135 bp                                           | HF564699 |
|  |  |                  |                      |   | <i>GPA2</i> | exon 1: ch.14: 9511569-9511671 bp<br>exon 2: ch.14: 9511858-9512042 bp<br>exon 3: ch.14: 9512159-9512260 bp                                                 | HF564700 |
|  |  |                  |                      |   | putative    | exon 1: ch.19: 55318511-55318525 bp<br>exon 2: ch.19: 55317992-55318159 bp<br>exon 3: ch.19: 55317442-55317756 bp                                           | -        |
|  |  |                  |                      |   | putative    | exon 1: ch.4: 83036286-83036385 bp<br>exon 2: ch.4: 83034365-83034549 bp<br>exon 3: ch.4: 83033822-83033899 bp                                              | -        |
|  |  | Hamadryas baboon | Pham_1.0 (5.3)       | 4 | <i>PREB</i> | exon 1: Contig759540_Contig186445: 3525-3971 bp                                                                                                             | HF564701 |
|  |  |                  |                      |   | <i>GPB5</i> | exon 1: Contig310869_Contig686011: 57117-57320 bp<br>exon 2: Contig310869_Contig686011: 52546-52734 bp                                                      | HF564702 |
|  |  |                  |                      |   | <i>TSHB</i> | exon 1: Contig587973_Contig486667: 19573-19734 bp<br>exon 2: Contig587973_Contig486667: 20182-20436 bp                                                      | HF564703 |
|  |  |                  |                      |   | <i>GPA2</i> | exon 1: Contig532543_Contig581763: 57908-58010 bp<br>exon 2: Contig532543_Contig581763: 57537-57721 bp<br>exon 3: Contig532543_Contig581763: 57319-57420 bp | HF564704 |
|  |  |                  |                      |   | putative    | exon 1: Contig540370_Contig372543: 47121-47279 bp<br>exon 2: Contig540370_Contig372543: 48801-49031 bp                                                      | -        |
|  |  |                  |                      |   | putative    | exon 1: Contig530460_Contig500046: 60362-60461 bp<br>exon 2: Contig530460_Contig500046: 62195-62379 bp<br>exon 3: Contig530460_Contig500046: 62813-62890 bp | -        |
|  |  | Common marmoset  | C_jacchus3.2.1 (6.6) | 3 | <i>GPB5</i> | exon 1: ch.10: 88231337-88231540 bp<br>exon 2: ch.10: 88226979-88227167 bp                                                                                  | HF564705 |
|  |  |                  |                      |   | <i>FSHB</i> | exon 1: ch.11: 93319440-93319598 bp<br>exon 2: ch.11: 93321125-93321355 bp                                                                                  | HF564706 |
|  |  |                  |                      |   | <i>GPA1</i> | exon 1: ch.4: 86149572-86149659 bp<br>exon 2: ch.4: 86147712-86147897 bp<br>exon 3: ch.4: 86147231-86147308 bp                                              | HF564707 |
|  |  |                  |                      |   | putative    | exon 1: ch.7: 151110716-151110877 bp<br>exon 2: ch.7: 151111319-151111573 bp                                                                                | -        |

|           |                         |                  |   |             |                                                                                                                                           |                                                                                                                         |   |
|-----------|-------------------------|------------------|---|-------------|-------------------------------------------------------------------------------------------------------------------------------------------|-------------------------------------------------------------------------------------------------------------------------|---|
|           |                         |                  |   |             | putative                                                                                                                                  | exon 1: ch.11: 120550622-120550724 bp<br>exon 2: ch.11: 120550255-120550439 bp<br>exon 3: ch.11: 120550052-120550153 bp | - |
|           | Philippine tarsier      | tarSyr1.0 (1.82) | 1 | <i>TSHB</i> | exon 1: scaffold_43385: 7794-7955 bp<br>exon 2: scaffold_43385: 8394-8648 bp                                                              | HF564708                                                                                                                |   |
|           |                         |                  |   | putative    | exon 1: scaffold_48264: 7511-7714 bp<br>exon 2: scaffold_48264: 1904-2092 bp                                                              | -                                                                                                                       |   |
|           |                         |                  |   | putative    | exon 1: scaffold_9445: 31047-31205 bp<br>exon 2: scaffold_9445: 32994-33224 bp                                                            | -                                                                                                                       |   |
|           |                         |                  |   | putative    | exon 1: GeneScaffold_4845: 9828-9930 bp<br>exon 2: GeneScaffold_4845: 9470-9654 bp<br>exon 3: GeneScaffold_4845: 9251-9352 bp             | -                                                                                                                       |   |
|           | Gray mouse lemur        | micMur1.0 (1.93) | 2 | <i>GPB5</i> | exon 1: GeneScaffold_1647: 294111-294317 bp<br>exon 2: GeneScaffold_1647: 298369-298557 bp                                                | HF564709                                                                                                                |   |
|           |                         |                  |   | <i>GPA2</i> | exon 1: GeneScaffold_1114: 316350-316452 bp<br>exon 2: GeneScaffold_1114: 315985-316169 bp<br>exon 3: GeneScaffold_1114: 315725-315826 bp | HF564710                                                                                                                |   |
|           | Northern greater galago | otoGar3 (3.89)   | 3 | <i>TSHB</i> | exon 1: GL873592.1: 6279759-6279920 bp<br>exon 2: GL873592.1: 6279074-6279328 bp                                                          | HF564711                                                                                                                |   |
|           |                         |                  |   | <i>GPA1</i> | exon 1: GL873822.1: 697816-697915 bp<br>exon 2: GL873822.1: 698924-699108 bp<br>exon 3: GL873822.1: 699515-699592 bp                      | HF564712                                                                                                                |   |
|           |                         |                  |   | <i>GPA2</i> | exon 1: GL873659.1: 1827105-1827207 bp<br>exon 2: GL873659.1: 1826751-1826935 bp<br>exon 3: GL873659.1: 1826552-1826653 bp                | HF564713                                                                                                                |   |
|           |                         |                  |   | putative    | exon 1: AAQR03111624.1: 22245-22448 bp<br>exon 2: AAQR03111624.1: 17406-17594 bp                                                          | -                                                                                                                       |   |
|           |                         |                  |   | putative    | exon 1: GL873520.1: 57294867-57295025 bp<br>exon 2: GL873520.1: 57296507-57296737 bp                                                      | -                                                                                                                       |   |
|           |                         |                  |   | putative    | exon 1: GL873730.1: 1602949-1602963 bp<br>exon 2: GL873730.1: 1603268-1603435 bp<br>exon 3: GL873730.1: 1603721-1603963 bp                | -                                                                                                                       |   |
| Scadentia | Northern treeshrew      | tupBell (1.89)   | 2 | <i>GPB5</i> | exon 1: GeneScaffold_2053: 226125-226328 bp<br>exon 2: GeneScaffold_2053: 223018-223206 bp                                                | HF564714                                                                                                                |   |

|          |                    |                |   |             |                                                                                                                      |                                                                                            |          |
|----------|--------------------|----------------|---|-------------|----------------------------------------------------------------------------------------------------------------------|--------------------------------------------------------------------------------------------|----------|
|          |                    |                |   |             | <i>TSHB</i>                                                                                                          | exon 1: GeneScaffold_5567: 152404-152565 bp<br>exon 2: GeneScaffold_5567: 153187-153441 bp | HF564715 |
| Rodentia | Mouse              | GRCm38 (>7)    | 6 | <i>GpB5</i> | exon 1: ch.12: 75415610-75415813 bp<br>exon 2: ch.12: 75412827-75413015 bp                                           | HF564716                                                                                   |          |
|          |                    |                |   | <i>TshB</i> | exon 1: ch.3: 102778150-102778311 bp<br>exon 2: ch.3: 102777470-102777724 bp                                         | HF564717                                                                                   |          |
|          |                    |                |   | <i>FshB</i> | exon 1: ch.2: 107058796-107058957 bp<br>exon 2: ch.2: 107057280-107057510 bp                                         | HF564718                                                                                   |          |
|          |                    |                |   | <i>LhB</i>  | exon 1: ch.7: 45420953-45420967 bp<br>exon 2: ch.7: 45421215-45421382 bp<br>exon 3: ch.7: 45421536-45421778 bp       | HF564719                                                                                   |          |
|          |                    |                |   | <i>GpA1</i> | exon 1: ch.4: 34904007-34904106 bp<br>exon 2: ch.4: 34905078-34905262 bp<br>exon 3: ch.4: 34907066-34907143 bp       | HF564720                                                                                   |          |
|          |                    |                |   | <i>GpA2</i> | exon 1: ch.19: 6226788-6226887 bp<br>exon 2: ch.19: 6226971-6227155 bp<br>exon 3: ch.19: 6227501-6227602 bp          | HF564721                                                                                   |          |
|          | Brown rat          | Rnor_5.0 (>7)  | 6 | <i>Gpb5</i> | exon 1: ch.6: 107800979-107801179 bp<br>exon 2: ch.6: 107798630-107798818 bp                                         | HF564722                                                                                   |          |
|          |                    |                |   | <i>TshB</i> | exon 1: ch.2: 224639095-224639256 bp<br>exon 2: ch.2: 224638463-224638717 bp                                         | HF564723                                                                                   |          |
|          |                    |                |   | <i>FshB</i> | exon 1: ch.3: 104703090-104703251 bp<br>exon 2: ch.3: 104701341-104701571 bp                                         | HF564724                                                                                   |          |
|          |                    |                |   | <i>LhB</i>  | exon 1: ch.1: 102492156-102492170 bp<br>exon 2: ch.1: 102492417-102492584 bp<br>exon 3: ch.1: 102492813-102493055 bp | HF564725                                                                                   |          |
|          |                    |                |   | <i>GpA1</i> | exon 1: ch.5: 54959545-54959644 bp<br>exon 2: ch.5: 54960615-54960799 bp<br>exon 3: ch.5: 54962025-54962102 bp       | HF564726                                                                                   |          |
|          |                    |                |   | <i>GpA2</i> | exon 1: ch.1: 228533643-228533748 bp<br>exon 2: ch.1: 228533899-228534083 bp<br>exon 3: ch.1: 228534170-228534271 bp | HF564727                                                                                   |          |
|          | Ord's kangaroo rat | dipOrd1 (1.85) | 2 | <i>GPB5</i> | exon 1: scaffold_31790: 15352-15555 bp<br>exon 2: scaffold_31790: 11670-11858 bp                                     | HF564728                                                                                   |          |

|  |            |                                |                |   |             |                                                                                                                                           |          |
|--|------------|--------------------------------|----------------|---|-------------|-------------------------------------------------------------------------------------------------------------------------------------------|----------|
|  |            |                                |                |   | <i>GPA2</i> | exon 1: GeneScaffold_5084: 145357-145453 bp<br>exon 2: GeneScaffold_5084: 145009-145193 bp<br>exon 3: GeneScaffold_5084: 144827-144928 bp | HF564729 |
|  |            |                                |                |   | putative    | exon 1: scaffold_3122: 30018-30032 bp<br>exon 2: scaffold_3122: 30293-30460 bp<br>exon 3: scaffold_3122: 30676-30918 bp                   | -        |
|  |            | Domesticated guinea pig        | cavPor3 (6.76) | 6 | <i>GPB5</i> | exon 1: scaffold_20: 8293393-8293596 bp<br>exon 2: scaffold_20: 8289251-8289439 bp                                                        | HF564730 |
|  |            |                                |                |   | <i>TSHB</i> | exon 1: scaffold_2: 39458123-39458284 bp<br>exon 2: scaffold_2: 39458858-39459112 bp                                                      | HF564731 |
|  |            |                                |                |   | <i>FSHB</i> | exon 1: scaffold_81: 5736300-5736458 bp<br>exon 2: scaffold_81: 5737858-5738088 bp                                                        | HF564732 |
|  |            |                                |                |   | <i>LHB</i>  | exon 1: scaffold_70: 8317756-8317770 bp<br>exon 2: scaffold_70: 8318009-8318176 bp<br>exon 3: scaffold_70: 8318359-8318601 bp             | HF564733 |
|  |            |                                |                |   | <i>GPA1</i> | exon 1: scaffold_12: 40822087-40822186 bp<br>exon 2: scaffold_12: 40824674-40824858 bp<br>exon 3: scaffold_12: 40825666-40825743 bp       | HF564734 |
|  |            |                                |                |   | <i>GPA2</i> | exon 1: scaffold_42: 5755484-5755586 bp<br>exon 2: scaffold_42: 5755175-5755359 bp<br>exon 3: scaffold_42: 5754978-5755079 bp             | HF564735 |
|  |            | Thirteen-lined ground squirrel | speTri1 (1.9)  | 1 | <i>LHB</i>  | exon 1: GeneScaffold_5156: 54806-54820 bp<br>exon 2: GeneScaffold_5156: 54277-54444 bp<br>exon 3: GeneScaffold_5156: 53797-54039 bp       | HF564736 |
|  | Lagomorpha | European rabbit                | oryCun2 (6.55) | 4 | <i>GPB5</i> | exon 1: ch.20: 11014811-11015014 bp<br>exon 2: ch.20: 11008342-11008530 bp                                                                | HF564737 |
|  |            |                                |                |   | <i>TSHB</i> | exon 1: ch.13: 49162045-49162206 bp<br>exon 2: ch.13: 49161360-49161614 bp                                                                | HF564738 |
|  |            |                                |                |   | <i>FSHB</i> | exon 1: ch.1: 169431787-169431945 bp<br>exon 2: ch.1: 169433407-169433637 bp                                                              | HF564739 |
|  |            |                                |                |   | <i>GPA1</i> | exon 1: ch.12: 73923649-73923748 bp<br>exon 2: ch.12: 73922472-73922656 bp<br>exon 3: ch.12: 73921965-73922042 bp                         | HF564740 |
|  |            |                                |                |   | putative    | exon 1: GL019028.1: 51905-51919 bp                                                                                                        | -        |

|                |              |                    |                  |   |             |                                                                                                                               |          |
|----------------|--------------|--------------------|------------------|---|-------------|-------------------------------------------------------------------------------------------------------------------------------|----------|
|                |              |                    |                  |   |             | exon 2: GL019028.1: 52131-52298 bp<br>exon 3: GL019028.1: 52457-52699 bp                                                      |          |
|                |              | American pika      | ochPri2.0 (1.93) | 4 | <i>GPB5</i> | exon 1: scaffold_1835: 59754-59957 bp<br>exon 2: scaffold_1835: 57889-58077 bp                                                | HF564741 |
|                |              |                    |                  |   | <i>FSHB</i> | exon 1: scaffold_7710: 97249-97407 bp<br>exon 2: scaffold_7710: 98840-99070 bp                                                | HF564742 |
|                |              |                    |                  |   | <i>LHB</i>  | exon 1: scaffold_30291: 7915-7929 bp<br>exon 2: scaffold_30291: 8172-8339 bp<br>exon 3: scaffold_30291: 8508-8750 bp          | HF564743 |
|                |              |                    |                  |   | <i>GPA2</i> | exon 1: scaffold_1851: 115984-116074 bp<br>exon 2: scaffold_1851: 115637-115821 bp<br>exon 3: scaffold_1851: 115436-115537 bp | HF564744 |
| Laurasiatheria | Cetacea      | Bottlenose dolphin | turTru1.0 (2.59) | 2 | <i>GPB5</i> | exon 1: GeneScaffold_1173: 128590-128793 bp<br>exon 2: GeneScaffold_1173: 123739-123927 bp                                    | HF564745 |
|                |              |                    |                  |   | <i>TSHB</i> | exon 1: GeneScaffold_3403: 221306-221467 bp<br>exon 2: GeneScaffold_3403: 221911-222165 bp                                    | HF564746 |
|                |              |                    |                  |   | putative    | exon 1: scaffold_100479: 55500-55658 bp<br>exon 2: scaffold_100479: 57290-57520 bp                                            | -        |
|                | Artiodactyla | Domestic cattle    | Btau_4.6.1 (>7)  | 5 | <i>GPB5</i> | exon 1: ch.10: 77405920-77406123 bp<br>exon 2: ch.10: 77402308-77402496 bp                                                    | HF564747 |
|                |              |                    |                  |   | <i>TSHB</i> | exon 1: ch.3: 30593982-30594143 bp<br>exon 2: ch.3: 30593288-30593542 bp                                                      | HF564748 |
|                |              |                    |                  |   | <i>FSHB</i> | exon 1: ch.15: 60640886-60641044 bp<br>exon 2: ch.15: 60642628-60642858 bp                                                    | HF564749 |
|                |              |                    |                  |   | <i>GPA1</i> | exon 1: ch.9: 65093579-65093678 bp<br>exon 2: ch.9: 65094774-65094958 bp<br>exon 3: ch.9: 65095586-65095663 bp                | HF564750 |
|                |              |                    |                  |   | <i>GPA2</i> | exon 1: ch.29: 44781245-44781347 bp<br>exon 2: ch.29: 44780900-44781084 bp<br>exon 3: ch.29: 44780687-44780788 bp             | HF564751 |
|                |              | Wild boar          | Sscrofa10.2 (4)  | 0 | putative    | exon 1: ch.1: 216816086-216816289 bp<br>exon 2: ch.1: 216820858-216821046 bp                                                  | -        |
|                |              |                    |                  |   | putative    | exon 1: ch.4: 115692468-115692629 bp<br>exon 2: ch.4: 115691771-115692025 bp                                                  | -        |

|                |              |                  |   |             |                                                                                                                               |                                                                                                                |   |
|----------------|--------------|------------------|---|-------------|-------------------------------------------------------------------------------------------------------------------------------|----------------------------------------------------------------------------------------------------------------|---|
|                |              |                  |   |             | putative                                                                                                                      | exon 1: ch.2: 32863860-32864018 bp<br>exon 2: ch.2: 32862073-32862303 bp                                       | - |
|                |              |                  |   |             | putative                                                                                                                      | exon 1: ch.6: 50063956-50063970 bp<br>exon 2: ch.6: 50064303-50064470 bp<br>exon 3: ch.6: 50064761-50065003 bp | - |
|                |              |                  |   |             | putative                                                                                                                      | exon 1: ch.1: 62247902-62248001 bp<br>exon 2: ch.1: 62246600-62246784 bp<br>exon 3: ch.1: 62246069-62246146 bp | - |
|                |              |                  |   |             | putative                                                                                                                      | exon 1: ch.2: 6378546-6378648 bp<br>exon 2: ch.2: 6378808-6378992 bp<br>exon 3: ch.2: 6379100-6379201 bp       | - |
|                | Vicugna      | vicPac1.0 (2.51) | 2 | <i>TSHB</i> | exon 1: GeneScaffold_3377: 688673-688834 bp<br>exon 2: GeneScaffold_3377: 689264-689518 bp                                    | HF564752                                                                                                       |   |
|                |              |                  |   | <i>FSHB</i> | exon 1: scaffold_21652: 3836-3994 bp<br>exon 2: scaffold_21652: 2062-2292 bp                                                  | HF564753                                                                                                       |   |
|                |              |                  |   | putative    | exon 1: GeneScaffold_1978: 4468-4570 bp<br>exon 2: GeneScaffold_1978: 3923-4107 bp<br>exon 3: GeneScaffold_1978: 3709-3810 bp | -                                                                                                              |   |
| Perissodactyla | Horse        | EquCab2 (6.79)   | 4 | <i>GPB5</i> | exon 1: ch.24: 10302024-10302227 bp<br>exon 2: ch.24: 10297810-10297998 bp                                                    | HF564754                                                                                                       |   |
|                |              |                  |   | <i>TSHB</i> | exon 1: ch.5: 53763695-53763856 bp<br>exon 2: ch.5: 53762980-53763234 bp                                                      | HF564755                                                                                                       |   |
|                |              |                  |   | <i>FSHB</i> | exon 1: ch.7: 96163704-96163862 bp<br>exon 2: ch.7: 96165420-96165650 bp                                                      | HF564756                                                                                                       |   |
|                |              |                  |   | <i>GPAI</i> | exon 1: ch.10: 39939964-39940063 bp<br>exon 2: ch.10: 39938739-39938923 bp<br>exon 3: ch.10: 39937915-39937992 bp             | HF564757                                                                                                       |   |
| Carnivora      | Domestic dog | CanFam3.1 (>7)   | 6 | <i>GPB5</i> | exon 1: ch.8: 37899180-37899383 bp<br>exon 2: ch.8: 37894667-37894855 bp                                                      | HF564758                                                                                                       |   |
|                |              |                  |   | <i>TSHB</i> | exon 1: ch.17: 52684440-52684601 bp<br>exon 2: ch.17: 52685051-52685305 bp                                                    | HF564759                                                                                                       |   |
|                |              |                  |   | <i>FSHB</i> | exon 1: ch.21: 50280214-50280372 bp<br>exon 2: ch.21: 50281412-50281642 bp                                                    | HF564760                                                                                                       |   |
|                |              |                  |   | <i>LHB</i>  | exon 1: ch.1: 107382855-107382869 bp                                                                                          | HF564761                                                                                                       |   |

|            |                     |                     |   |             |             |                                                                                                                            |          |
|------------|---------------------|---------------------|---|-------------|-------------|----------------------------------------------------------------------------------------------------------------------------|----------|
|            |                     |                     |   |             |             | exon 2: ch.1: 107383225-107383392 bp<br>exon 3: ch.1: 107383709-107383951 bp                                               |          |
|            |                     |                     |   |             | <i>GPA1</i> | exon 1: ch.12: 46612940-46613039 bp<br>exon 2: ch.12: 46611581-46611765 bp<br>exon 3: ch.12: 46611068-46611145 bp          | HF564762 |
|            |                     |                     |   |             | <i>GPA2</i> | exon 1: ch.18: 52243715-52243811 bp<br>exon 2: ch.18: 52243974-52244158 bp<br>exon 3: ch.18: 52244270-52244371 bp          | HF564763 |
|            | Domestic cat        | Felis_catus-6.2 (2) | 0 | putative    |             | exon 1: ch.B3: 111203119-111203322 bp<br>exon 2: ch.B3: 111197857-111198045 bp                                             | -        |
|            |                     |                     |   | putative    |             | exon 1: JH408686.1: 476591-476752 bp<br>exon 2: JH408686.1: 475919-476173 bp                                               | -        |
|            |                     |                     |   | putative    |             | exon 1: ch.D1: 86567556-86567714 bp<br>exon 2: ch.D1: 86569591-86569821 bp                                                 | -        |
|            |                     |                     |   | putative    |             | exon 1: ch.E2: 8327510-8327524 bp<br>exon 2: ch.E2: 8327884-8328057 bp<br>exon 3: ch.E2: 8328352-8328594 bp                | -        |
|            |                     |                     |   | putative    |             | exon 1: ch.D1: 109574479-109574575 bp<br>exon 2: ch.D1: 109574129-109574317 bp<br>exon 3: ch.D1: 109573955-109574035 bp    | -        |
| Chiroptera | Little brown myotis | myoLuc2 (6.64)      | 5 | <i>GPB5</i> |             | exon 1: GL429933.1: 234916-235119 bp<br>exon 2: GL429933.1: 237983-238171 bp                                               | HF564764 |
|            |                     |                     |   | <i>TSHB</i> |             | exon 1: GL429868.1: 415359-415520 bp<br>exon 2: GL429868.1: 414667-414921 bp                                               | HF564765 |
|            |                     |                     |   | <i>FSHB</i> |             | exon 1: GL429859.1: 2610107-2610265 bp<br>exon 2: GL429859.1: 2612576-2612806 bp                                           | HF564766 |
|            |                     |                     |   | <i>GPA1</i> |             | exon 1: GL429919.1: 1772216-1772315 bp<br>exon 2: GL429919.1: 1770876-1771060 bp<br>exon 3: GL429919.1: 1770333-1770410 bp | HF564767 |
|            |                     |                     |   | <i>GPA2</i> |             | exon 1: GL430329.1: 176590-176692 bp<br>exon 2: GL430329.1: 176249-176433 bp<br>exon 3: GL430329.1: 176060-176161 bp       | HF564768 |
|            | Large flying fox    | pteVam1 (2.63)      | 1 | <i>FSHB</i> |             | exon 1: GeneScaffold_1483: 41364-41522 bp<br>exon 2: GeneScaffold_1483: 43099-43329 bp                                     | HF564769 |

|             |              |                           |                  |   |                                                                                                                               |                                                                                                                                           |          |
|-------------|--------------|---------------------------|------------------|---|-------------------------------------------------------------------------------------------------------------------------------|-------------------------------------------------------------------------------------------------------------------------------------------|----------|
|             |              |                           |                  |   | putative                                                                                                                      | exon 1: GeneScaffold_1828: 471016-471219 bp<br>exon 2: GeneScaffold_1828: 467540-467728 bp                                                | -        |
|             |              |                           |                  |   | putative                                                                                                                      | exon 1: GeneScaffold_1909: 317849-317863 bp<br>exon 2: GeneScaffold_1909: 317342-317509 bp<br>exon 3: GeneScaffold_1909: 316812-317054 bp | -        |
|             |              |                           |                  |   | putative                                                                                                                      | exon 1: GeneScaffold_2911: 279921-280020 bp<br>exon 2: GeneScaffold_2911: 278707-278891 bp<br>exon 3: GeneScaffold_2911: 278176-278251 bp | -        |
|             |              |                           |                  |   | putative                                                                                                                      | exon 1: GeneScaffold_2872: 118370-118472 bp<br>exon 2: GeneScaffold_2872: 118034-118218 bp<br>exon 3: GeneScaffold_2872: 117823-117924 bp | -        |
|             | Eulipotyphla | West European hedgehog    | eriEur1 (1.86)   | 2 | <i>GPB5</i>                                                                                                                   | exon 1: scaffold_279965: 5262-5465 bp<br>exon 2: scaffold_279965: 11188-11376 bp                                                          | HF564770 |
| <i>GPAI</i> |              |                           |                  |   | exon 1: scaffold_294696: 30485-30584 bp<br>exon 2: scaffold_294696: 28356-28540 bp<br>exon 3: scaffold_294696: 24094-24171 bp | HF564771                                                                                                                                  |          |
| putative    |              |                           |                  |   | exon 1: scaffold_265859: 23829-23987 bp<br>exon 2: scaffold_265859: 26081-26311 bp                                            | -                                                                                                                                         |          |
|             |              | Common shrew              | sorAra1 (1.92)   | 1 | <i>FSHB</i>                                                                                                                   | exon 1: scaffold_247522: 20799-20957 bp<br>exon 2: scaffold_247522: 19531-19761 bp                                                        | HF564772 |
| Xenarthra   | Xenarthra    | Nine-banded armadillo     | dasNov3.0 (6)    | 4 | <i>GPB5</i>                                                                                                                   | exon 1: JH566294.1: 89277-89480 bp<br>exon 2: JH566294.1: 90749-90937 bp                                                                  | HF564773 |
|             |              |                           |                  |   | <i>TSHB</i>                                                                                                                   | exon 1: JH568870.1: 961247-961408 bp<br>exon 2: JH568870.1: 960509-960763 bp                                                              | HF564774 |
|             |              |                           |                  |   | <i>FSHB</i>                                                                                                                   | exon 1: JH561443.1: 6523021-6523179 bp<br>exon 2: JH561443.1: 6521245-6521475 bp                                                          | HF564775 |
|             |              |                           |                  |   | <i>GPAI</i>                                                                                                                   | exon 1: JH565894.1: 238007-238106 bp<br>exon 2: JH565894.1: 236773-236957 bp<br>exon 3: JH565894.1: 236282-236359 bp                      | HF564776 |
|             |              |                           |                  |   | putative                                                                                                                      | exon 1: JH562401.1: 63483-63497 bp<br>exon 2: JH562401.1: 63772-63939 bp<br>exon 3: JH562401.1: 64171-64413 bp                            | -        |
|             |              | Hoffmann's two-toed sloth | choHof1.0 (1.93) | 1 | <i>FSHB</i>                                                                                                                   | exon 1: scaffold_97802: 2364-2522 bp<br>exon 2: scaffold_97802: 4063-4293 bp                                                              | HF564777 |

|            |             |                        |                |             |                                                                                                                            |                                                                                                                                  |          |
|------------|-------------|------------------------|----------------|-------------|----------------------------------------------------------------------------------------------------------------------------|----------------------------------------------------------------------------------------------------------------------------------|----------|
|            |             |                        |                |             | putative                                                                                                                   | exon 1: scaffold_4266: 11229-11328 bp<br>exon 2: scaffold_4266: 9765-9949 bp<br>exon 3: scaffold_4266: 9277-9354 bp              | -        |
|            |             |                        |                |             | putative                                                                                                                   | exon 1: GeneScaffold_606: 9565-9667 bp<br>exon 2: GeneScaffold_606: 9241-9425 bp<br>exon 3: GeneScaffold_606: 9036-9137 bp       | -        |
| Afrotheria | Tenrecidae  | Lesser hedgehog tenrec | echTel1 (1.9)  | 2           | <i>GPB5</i>                                                                                                                | exon 1: scaffold_314685: 52542-52745 bp<br>exon 2: scaffold_314685: 47689-47877 bp                                               | HF564778 |
|            |             |                        |                |             | <i>TSHB</i>                                                                                                                | exon 1: scaffold_58469: 571-732 bp<br>exon 2: scaffold_58469: 1112-1366 bp                                                       | HF564779 |
|            |             |                        |                |             | putative                                                                                                                   | exon 1: GeneScaffold_3789: 41136-41235 bp<br>exon 2: GeneScaffold_3789: 3536-3720 bp<br>exon 3: GeneScaffold_3789: 3039-3116 bp  | -        |
|            | Proboscidea | African bush elephant  | loxAfr3 (6.77) | 5           | <i>GPB5</i>                                                                                                                | exon 1: GL010036.1: 38956254-38956457 bp<br>exon 2: GL010036.1: 38951994-38952182 bp                                             | HF564780 |
|            |             |                        |                |             | <i>TSHB</i>                                                                                                                | exon 1: GL010038.1: 61018844-61019005 bp<br>exon 2: GL010038.1: 61019447-61019701 bp                                             | HF564781 |
|            |             |                        |                |             | <i>FSHB</i>                                                                                                                | exon 1: GL010048.1: 19610274-19610432 bp<br>exon 2: GL010048.1: 19607338-19607568 bp                                             | HF564782 |
|            |             |                        |                |             | <i>GPA1</i>                                                                                                                | exon 1: GL010027.1: 78659060-78659159 bp<br>exon 2: GL010027.1: 78660191-78660375 bp<br>exon 3: GL010027.1: 78660800-78660877 bp | HF564783 |
|            |             |                        |                |             | <i>GPA2</i>                                                                                                                | exon 1: GL010098.1: 4552980-4553076 bp<br>exon 2: GL010098.1: 4553223-4553407 bp<br>exon 3: GL010098.1: 4553516-4553617 bp       | HF564784 |
|            |             |                        |                |             | putative                                                                                                                   | exon 1: GL010031.1: 8821450-8821464 bp<br>exon 2: GL010031.1: 8821777-8821944 bp<br>exon 3: GL010031.1: 8822155-8822397 bp       | -        |
| Hyracoidea | Rock hyrax  | proCap1 (2.19)         | 1              | <i>GPA1</i> | exon 1: scaffold_18646: 22453-22552 bp<br>exon 2: scaffold_18646: 21240-21424 bp<br>exon 3: scaffold_18646: 20757-20834 bp | HF564785                                                                                                                         |          |
|            |             |                        |                | putative    | exon 1: scaffold_31316: 10169-10330 bp<br>exon 2: scaffold_31316: 10773-11027 bp                                           | -                                                                                                                                |          |
|            |             |                        |                | putative    | exon 1: GeneScaffold_1825: 41177-41273 bp                                                                                  | -                                                                                                                                |          |

|  |  |  |  |  |  |                                                                                        |  |
|--|--|--|--|--|--|----------------------------------------------------------------------------------------|--|
|  |  |  |  |  |  | exon 2: GeneScaffold_1825: 40860-41044 bp<br>exon 3: GeneScaffold_1825: 40651-40752 bp |  |
|--|--|--|--|--|--|----------------------------------------------------------------------------------------|--|

<sup>a</sup>, the common names of 35 eutherian species were provided according to Wilson and Reeder (2005); <sup>b</sup>, genomic sequence redundancy was given in brackets; <sup>c</sup>, translated exons; ch., chromosome.
