# Supplementary material for: Initial description of primate-specific cystine-knot Prometheus genes and differential gene expansions of D-dopachrome tautomerase genes
Source: PubMed Central journal article supplement — Meta Gene. 2015 Apr 25;4:118–28. doi: 10.1016/j.mgene.2015.02.005 (PMC4412970; doi:10.1016/j.mgene.2015.02.005), 2015-04-25
Supplement: mmc2.pdf [file mmc2.pdf]

**Supplementary data file 2:** Direct evidence of new human gene annotations.

| Species             | Gene         | GenBank ID                                                                                                                                     |
|---------------------|--------------|------------------------------------------------------------------------------------------------------------------------------------------------|
| <i>Homo sapiens</i> | <i>PREA1</i> | -                                                                                                                                              |
|                     | <i>PREA2</i> | AI479321.1, AL705258.1, BI460798.1, BC040601.1, BF376791.1, DB041601.1, DB045576.1, DB060701.1, DB083116.1, DB087725.1, DB340956.1, DR007933.1 |
|                     | <i>PREA3</i> | AK127974.1, DB028205.1, DB336786.1                                                                                                             |
|                     | <i>PREB</i>  | AK095281.1, DA440918.1, DA450022.1, DB018408.1, DB313698.1                                                                                     |
|                     | <i>DDT2</i>  | BM805481.1, BX363011.2, BX403457.2, BX446171.2, CB269885.1, DC339950.1                                                                         |
|                     | <i>DDT3</i>  | BF511344.1, BQ771818.1, DA816529.1                                                                                                             |
|                     | <i>DDT4</i>  | -                                                                                                                                              |
