# Supplementary material for: Initial description of primate-specific cystine-knot Prometheus genes and differential gene expansions of D-dopachrome tautomerase genes
Source: PubMed Central journal article supplement — Meta Gene. 2015 Apr 25;4:118–28. doi: 10.1016/j.mgene.2015.02.005 (PMC4412970; doi:10.1016/j.mgene.2015.02.005), 2015-04-25
Supplement: mmc7.pdf [file mmc7.pdf]

# A

|                                    |   | 10                      | 20           | 30        | 40      | 50       | 60     |    |
|------------------------------------|---|-------------------------|--------------|-----------|---------|----------|--------|----|
| <i>Homo sapiens</i> TSHB           | 1 | TTTGAAACAGAGAGAGGAAAA   | TGCATGCTTAA  | TAATGTC   | --AGTTT | CCAGGT   | AAAG   | 56 |
| <i>Macaca mulatta</i> TSHB         | 1 | TTTGAAACAGGAGAGAGGAAAA  | TGCATGCTTCA  | TAATGTC   | --AGTTT | CCAGGG   | AAAG   | 56 |
| <i>Papio hamadryas</i> TSHB        | 1 | TTTGAAACAGGAGAGAGGAAAA  | TGCATGCTTCA  | TAATGTC   | --AGTTT | CCAGGG   | AAAG   | 56 |
| <i>Tarsius syrichta</i> TSHB       | 1 | TTTGAAATC--AGAGAGGAAAA  | TGCATGCTTCA  | TAATGTC   | CAGAGTT | CCAGGG   | GAAG   | 56 |
| <i>Otolemur garnettii</i> TSHB     | 1 | TTTGAAATAGGAGAGAGGAAAA  | TGCATGCTTCA  | TAATGTC   | CAGAGTT | CCAGGA   | GAAG   | 58 |
| <i>Mus musculus</i> TshB           | 1 | TTTCAAATAGAGAGAGGAAGA   | TGCATGCTATA  | TAATGTC   | CAGAGTT | CCAGG    | GAGAGG | 59 |
| <i>Rattus norvegicus</i> TshB      | 1 | TTTCAAATAGGAGAGAGGAAGA  | TGCATGCTATA  | TAATGTC   | CAGGTTT | CCAGG    | GAGAGG | 59 |
| <i>Cavia porcellus</i> TSHB        | 1 | TTTGAAATAGGAGAGAGGAAAA  | TGCATACTAAA  | TAATGTC   | CAGAA   | TTCCAGAG | TAAG   | 58 |
| <i>Oryctolagus cuniculus</i> TSHB  | 1 | TTTGAAATGGGAGATAGGAAAA  | TGCATGCTTCA  | TAATGTC   | CAGAGTT | CCAGGG   | GACG   | 58 |
| <i>Tursiops truncatus</i> TSHB     | 1 | TTTGAAATAGGAGAAAAGGAAA  | TTCGTGCTGCA  | TAATGTC   | CAGAGTT | CCAGAG   | GAAG   | 58 |
| <i>Bos taurus</i> TSHB             | 1 | TTTGAAATAGGAGAAAAGGAAAA | TTTCATGCTACA | TAATGTC   | CACAGTT | CCAGAG   | GAAG   | 59 |
| <i>Vicugna pacos</i> TSHB          | 1 | TTTGAAATAGGAGAAAAGGAAAA | TTTCATACTGCA | TAATGTC   | CAGAGTT | CCAGAG   | GAAG   | 58 |
| <i>Equus caballus</i> TSHB         | 1 | TTTGAAATAGGAGAGAGGAAAA  | TTTCATGCTGAA | TAATGTC   | CAGAGTT | CCAGAG   | GAAG   | 58 |
| <i>Canis lupus familiaris</i> TSHB | 1 | TTTGAAATAGGAGAGAGGAAAA  | TTTCATGCTGTA | TAATGTC   | CAGAGTT | CCAGAG   | CAGT   | 58 |
| <i>Myotis lucifugus</i> TSHB       | 1 | TTTGAAATAGGAGAAAAGGAAA  | TTTATGCTGCA  | TAATGTC   | --AGTTT | CCAGAG   | GAAG   | 56 |
| <i>Dasybus novemcinctus</i> TSHB   | 1 | TTTGAAATAGGAGAGGGGAAAA  | TGCATGCTGCA  | TAATGTC   | CAGAGTT | CCAGAG   | GAAG   | 58 |
| <i>Loxodonta africana</i> TSHB     | 1 | TTTAAATAGGACAGAGGGAAG   | TGCACACTGCA  | TAATGTCAA | AGCTG   | CCAGAG   | GAAG   | 58 |

|                                    |    | 70              | 80           | 90         | 100         | 110          | 120 |     |
|------------------------------------|----|-----------------|--------------|------------|-------------|--------------|-----|-----|
| <i>Homo sapiens</i> TSHB           | 57 | ATATTGTGAGCTTGT | TTTGTCTAAAT  | TACATTTTAT | TTGGAATTCAG | TATGAATTTTCA | ATA | 116 |
| <i>Macaca mulatta</i> TSHB         | 57 | ATATTGTGAGCTTGT | TTTGTCTAAAT  | TACATTTTAT | TTGGAGTTCAG | TATGAATTTTCA | ATA | 116 |
| <i>Papio hamadryas</i> TSHB        | 57 | ATATTGTGAGCTTGT | TTTGTCTAAAT  | TACATTTTAT | TTGGAGTTCAG | TATGAATTTTCA | ATA | 116 |
| <i>Tarsius syrichta</i> TSHB       | 57 | ATATCGTGAGCTTGT | TTTGTCTAAAC  | CACATTTTAT | TTGGGGTTCAG | TATGAATTTTCA | ATA | 116 |
| <i>Otolemur garnettii</i> TSHB     | 59 | ATATCGTGAGCTTGT | TTTGTCTAAAC  | CACATTTTAT | TTGGGGTTCAG | TATGAATTTTCA | AAA | 118 |
| <i>Mus musculus</i> TshB           | 60 | ATATAGTGAACCTGT | TTTGTCTAAACA | AGTTTTAT   | TTGGGGTTCAG | TATGAATTTTCA | ATA | 119 |
| <i>Rattus norvegicus</i> TshB      | 60 | ATCTAGTGAACCTGT | TTTGTCTAAACA | CAGTTTTAT  | TTGGGGTTCAG | TATGAATTTTCA | ATA | 119 |
| <i>Cavia porcellus</i> TSHB        | 59 | ATATCGTGAACCTGT | TTTGTCTAAAC  | CACATTTTAT | TTGGGGTTCAG | TATGAATTTTCA | GTA | 117 |
| <i>Oryctolagus cuniculus</i> TSHB  | 59 | ATACTGTGAACCTGT | TTTGTCTAAAC  | CACATTTTAT | TTGGAGTTTGT | TATGAATTTTCA | ATA | 118 |
| <i>Tursiops truncatus</i> TSHB     | 59 | ATGTTGTGAAATTGT | TTTGTCTAAAC  | CACATTTTAT | TTGGGGTTCAG | TATGAATTTTCA | ATA | 118 |
| <i>Bos taurus</i> TSHB             | 60 | AT--GTGAGTGT    | TTTGTCTAAAC  | CACATTTTAT | TTGAGATTCA  | TATGAATTTTCA | ATA | 116 |
| <i>Vicugna pacos</i> TSHB          | 59 | ATGTTGTGAAATTGT | TTTGTCTAAAC  | CACATTTTAT | TTGGGGCTCT  | TATGAATTTTCA | ATA | 118 |
| <i>Equus caballus</i> TSHB         | 59 | ATGTTGTGAAATTGT | TTTGTCTAAAC  | CAGTTTTAT  | TTGAGTTTCAG | TATGAATTTTCA | GTA | 118 |
| <i>Canis lupus familiaris</i> TSHB | 59 | ATGTTGTGAAATTGT | TTTGTCTAAAC  | ATTTTTAT   | TTGGGGTTCAG | TATGAATTTTCA | ATA | 118 |
| <i>Myotis lucifugus</i> TSHB       | 57 | -----CCCTGTTT   | TTTGTCTAAAC  | CACATTTTAT | TTGGGGTTCAG | TATGAATTTTCA | ATA | 107 |
| <i>Dasybus novemcinctus</i> TSHB   | 59 | ATCTTGTGAACCTGT | TTTGTCTAAAC  | CACATTTTAT | TTGGGGTTCAG | TATGAATTTTCA | ATA | 118 |
| <i>Loxodonta africana</i> TSHB     | 59 | ATATTATGAACCTGT | TTTGTCTAAAC  | CACATTTTAT | -----       | TATGAATTTTCA | GTA | 107 |

AAAAAAAAAAAA

|                                    |     | 130          | 140          | 150        | 160          | 170       | 180        |     |
|------------------------------------|-----|--------------|--------------|------------|--------------|-----------|------------|-----|
| <i>Homo sapiens</i> TSHB           | 117 | GATGCTTTTT-- | CAGATAAGAAAG | CAGTAAATCA | AAATGCAATTG  | TATAAAACA | AAGAAGATCA | 174 |
| <i>Macaca mulatta</i> TSHB         | 117 | GATGCTTTTT-- | CAGATAAAAAAG | CAGTAAATCA | AAATGCAATTAT | TATAAAACA | AGGAAGATCA | 174 |
| <i>Papio hamadryas</i> TSHB        | 117 | GATGCTTTTT-- | CAGATAAAAAAG | CAGTAAATCA | AAATGCAATTAT | TATAAAACA | AGGAAGATCA | 174 |
| <i>Tarsius syrichta</i> TSHB       | 117 | GATGTTTTTT-- | CAGATAAGAAAG | CAGTAAATCA | AAATGCAATTAT | TATAAAACA | AAGAAGATCA | 174 |
| <i>Otolemur garnettii</i> TSHB     | 119 | GATGTTTTTT-- | CAGATAAGAAAG | CAGTAAATCA | AAATGCAATTAT | TATAAAACA | AAGAAGATCA | 176 |
| <i>Mus musculus</i> TshB           | 120 | GATGCTTTTT-- | CAGATAAGAAAG | CAGCAATTCG | AATGCAATTAT  | TATAAAACA | AAGAAGATCA | 177 |
| <i>Rattus norvegicus</i> TshB      | 120 | GATGCTTTTT-- | CAGATAAGAAAG | CAGCAATTCG | AATGCAATTAT  | TATAAAACA | AAGAAGATCA | 177 |
| <i>Cavia porcellus</i> TSHB        | 118 | GATGTTTTTT-- | CAGATAAGAAAG | CAGTAAATCA | AAATGCAATTAT | TATAAAACA | AAGA--TCA  | 172 |
| <i>Oryctolagus cuniculus</i> TSHB  | 119 | GATGTTTTTG-- | CAGATAAGAAAG | CAGCAACTCA | AGTCAATTAT   | TATAAAACA | AAGAAGCTCA | 176 |
| <i>Tursiops truncatus</i> TSHB     | 119 | GATGGTTTTT-- | TAGATAAGGAAG | CGGTAATTC  | AAATGTGATTAT | TATAAAACA | AAGAAGATCA | 176 |
| <i>Bos taurus</i> TSHB             | 117 | GATGGTTTTT-- | CAGATAAGAAAG | CAGTAAATCA | AAATGTGATTAT | TATAAAACA | AAGAGATCA  | 174 |
| <i>Vicugna pacos</i> TSHB          | 119 | GATGTTTTCT-- | TAGATAAGGAAG | CCAGTAAAT  | CAATGTGATTAT | TATAAAACA | AAGAAGATCA | 176 |
| <i>Equus caballus</i> TSHB         | 119 | GATGTTTTTT-- | CAGATAAGAAAG | CAGTAAATCA | AAATGCAATTAT | TATAAAACA | AAGAAGATCA | 176 |
| <i>Canis lupus familiaris</i> TSHB | 119 | GATGTTTTTTT  | CAGATAAGAAAG | CAGTAAATCA | AAATGCAATTAT | TATAAAACA | AAGAAGATCA | 178 |
| <i>Myotis lucifugus</i> TSHB       | 108 | GATGTTTTTT-- | CAGATAAGGAAG | CAGTAAATCA | AAATGCAATTAT | TATAAAACA | AAGAAGATCA | 165 |
| <i>Dasybus novemcinctus</i> TSHB   | 119 | GATATTTTTT-- | CAGATAAGAGAG | CAGTCAATTC | AAATGCAATTAT | TATAAAACA | AAGAAGATCA | 176 |
| <i>Loxodonta africana</i> TSHB     | 108 | GATGATTTTT-- | CAGATAAGAAAG | CAATAATTC  | AAATGCAATTAT | TATAAAACA | AAGAAGATCA | 165 |

BBBBB

BBBBBB

CCCCCCCCCCCCCCCCCCCCCCCCCCCC

|                                    |     | 190                                 | 200                          | 210  | 220 | 230 | 240 |  |
|------------------------------------|-----|-------------------------------------|------------------------------|------|-----|-----|-----|--|
| <i>Homo sapiens</i> TSHB           | 175 | GA-GGG-ATTATCTGAAGGGTATAAAATGAACC   | CAAGAGCTTTTAGTTGGGTCAC       | CACA | 232 |     |     |  |
| <i>Macaca mulatta</i> TSHB         | 175 | GA-GGGGATTATCTGAAGGGTATAAAATGAACC   | CAAGAGCTTTTAGTTGGGTCATCACA   | 233  |     |     |     |  |
| <i>Papio hamadryas</i> TSHB        | 175 | GA-GGGGATTATCTGAAGGGTATAAAATGAACC   | CAAGAGCTTTTAGTTGGGTCATCACA   | 233  |     |     |     |  |
| <i>Tarsius syrichta</i> TSHB       | 175 | GAAGGGGATTATCTGAAGGGTATAAAATGAACC   | CAAGAGCTTTTAGCTGGGTCATCACA   | 234  |     |     |     |  |
| <i>Otolemur garnettii</i> TSHB     | 177 | GAGGGGAATTATCTGAAGGGTATAAAATGAACC   | CAAGAGCTTTCAGTCTGGGTCATCACA  | 236  |     |     |     |  |
| <i>Mus musculus</i> TshB           | 178 | GAGGGGAATTATCTGAAGGGTATAAAATGAAC    | CGAGAG-----TGGGTCATCACA      | 228  |     |     |     |  |
| <i>Rattus norvegicus</i> TshB      | 178 | GAGGGGAATTATCTCGAAGGGTATAAAATGAAC   | --AGAG-----TCTGGGTCATCACA    | 228  |     |     |     |  |
| <i>Cavia porcellus</i> TSHB        | 173 | GAGGGGAATTATCTTGAAGAGTATAAAACGAAC   | CAAGAG-----TCTGGGTCATCACA    | 225  |     |     |     |  |
| <i>Oryctolagus cuniculus</i> TSHB  | 177 | GAGGGGAATTATCTGCTGAAGGATATAAAATGAAC | CAAGAGCTCTCAGTCTGGGTCATCACA  | 236  |     |     |     |  |
| <i>Tursiops truncatus</i> TSHB     | 177 | GAGAGGAATTATCTGAAGGGTATAAAATGAACC   | CAAGAGCTTCTAGTCTGGGTCATTACA  | 236  |     |     |     |  |
| <i>Bos taurus</i> TSHB             | 175 | GAGAGGAATTATCTGAAGGGTATAAAATGAACC   | CAAGAGCTTTTAGTCTGGGTCATTACA  | 234  |     |     |     |  |
| <i>Vicugna pacos</i> TSHB          | 177 | GAGAGGAATTATCTGAAGGGTATAAAATGAACC   | CAAGAGATTTTAGTCTGGGTCTTTACA  | 236  |     |     |     |  |
| <i>Equus caballus</i> TSHB         | 177 | GAGAGGAATTATCTCGAAGGGTATAAAATGAAC   | --AAGAGCGTTTAGTCTGGGTCATTACA | 235  |     |     |     |  |
| <i>Canis lupus familiaris</i> TSHB | 179 | GAGAGGAATTATCTCGAAGGGTATAAAATGAAC   | CAAGAGCTTTTAGTCTGGGTCATTATA  | 238  |     |     |     |  |
| <i>Myotis lucifugus</i> TSHB       | 166 | GAGGGACTTATCTCAAAGGGTATAAAATGAACC   | CAAGAGGTTTTGTCTGAGTCACTACA   | 225  |     |     |     |  |
| <i>Dasybus novemcinctus</i> TSHB   | 177 | GAGGGGAATTATGCTGAAAATATAAAATGAACC   | AAGAGCTTTTAGTATGGGCCATTACA   | 236  |     |     |     |  |
| <i>Loxodonta africana</i> TSHB     | 166 | GAGGGGAATTATCTTGAAGGGTATAAAATGAAC   | CAAGAGCTTTTAGTCAAGGCCATTACA  | 225  |     |     |     |  |

DDDD

|                                    |     | 250                                      | 260                     | 270 | 280 | 290 | 300 |  |
|------------------------------------|-----|------------------------------------------|-------------------------|-----|-----|-----|-----|--|
| <i>Homo sapiens</i> TSHB           | 233 | GCATCTGCTCACCAATGCA-----AAGTAAGGTAGGTG   | CTATAGTGAGAAGGCCTCTGTG  | 287 |     |     |     |  |
| <i>Macaca mulatta</i> TSHB         | 234 | GCATCTGCTCACCAATGCA-----AAGTAAGGTAGGTG   | CTATAGTAAGAAGGCCTCTGTG  | 288 |     |     |     |  |
| <i>Papio hamadryas</i> TSHB        | 234 | GCATCTGCTCACCAATGCA-----AAGTAAGGTAGGTG   | CTATAGTAAGAAGGCCTCTGTG  | 288 |     |     |     |  |
| <i>Tarsius syrichta</i> TSHB       | 235 | GCATCCGCTCACCAATGCA-----AAGTAAGGTAGGTG   | CTAACTGAGAAGGCCTGCA     | 288 |     |     |     |  |
| <i>Otolemur garnettii</i> TSHB     | 237 | GCATCCGCTCACCCTATGCA-----AAGCAAGGTAGGTG  | CTATACTAAGAAGGCCTCTGTG  | 291 |     |     |     |  |
| <i>Mus musculus</i> TshB           | 229 | GCAGTAACTCAGTCATGCA-----AAGTAAGGTAGGTG   | CTACCCCTGTGCAGAACCTGTA  | 283 |     |     |     |  |
| <i>Rattus norvegicus</i> TshB      | 229 | GCATTAACTCGCCAGTGC-----AAGTAAGGTAGGTG    | CTTACCCGAGCAGACCTGTA    | 283 |     |     |     |  |
| <i>Cavia porcellus</i> TSHB        | 226 | GCATCAGCTCACCAATGCA-----AAGTAAGGTAAAGTGC | CTATATGAGAAGGCCTCTGTG   | 280 |     |     |     |  |
| <i>Oryctolagus cuniculus</i> TSHB  | 237 | GCCTCAGCTCACCAATGCA-----AAGGTAGGTG       | CGCAAAATGAGAAGACTCTGTG  | 287 |     |     |     |  |
| <i>Tursiops truncatus</i> TSHB     | 237 | GCATCAGCTCCCAATGCA-----AAGTAAGGTAGGTG    | CTACACTGAGAAGGCATTTGTG  | 291 |     |     |     |  |
| <i>Bos taurus</i> TSHB             | 235 | ACATCAGCTCACCAATGCA-----AAGTAAGGTAGGTG   | CTACCTGAGAAGGCCTTTGTG   | 289 |     |     |     |  |
| <i>Vicugna pacos</i> TSHB          | 237 | GCATCAGCTCACCAATGCA-----AAGTAAGGTAGGTG   | CTACACTGAAAAGGCCTTTGTG  | 291 |     |     |     |  |
| <i>Equus caballus</i> TSHB         | 236 | GCATCAGCTCACCAATGCA-----AAGTAAGGTAGGTG   | CTGCACCTGAGAAGGCCTTTGTG | 290 |     |     |     |  |
| <i>Canis lupus familiaris</i> TSHB | 239 | CCATCCAGCTCACCAATGCA-----AAGTAAGGTAGGTG  | CTTACACTGAGGAGGCCTTTGTG | 293 |     |     |     |  |
| <i>Myotis lucifugus</i> TSHB       | 226 | GCATCAGCTCACCAATGCAAGAACAAGTAAGGTAGGTG   | CTTACACTGAGAAGGCCTTTGCA | 285 |     |     |     |  |
| <i>Dasybus novemcinctus</i> TSHB   | 237 | GCATCAACTCATTCAATGCA-----AATTCAGGTAAAGT  | TTCTATACTGAGAAGGCTTTGGG | 291 |     |     |     |  |
| <i>Loxodonta africana</i> TSHB     | 226 | GCATCAGCTC--CAGTGC-----AAGTCAGGTAGGTG    | CTATCTGAGAAGGCTTTGTG    | 278 |     |     |     |  |

310

|                                    |     |                 |                |
|------------------------------------|-----|-----------------|----------------|
| <i>Homo sapiens</i> TSHB           | 288 | AAATGATATGTTCTT | 302 (-3459 bp) |
| <i>Macaca mulatta</i> TSHB         | 289 | AAATGAAATGTTCTT | 303 (-3284 bp) |
| <i>Papio hamadryas</i> TSHB        | 289 | AAATGAAATGTTCTT | 303 (-3450 bp) |
| <i>Tarsius syrichta</i> TSHB       | 289 | AAATGAAATGTTCTT | 303 (-3827 bp) |
| <i>Otolemur garnettii</i> TSHB     | 292 | AAATAAAATGTTCTT | 306 (-7147 bp) |
| <i>Mus musculus</i> TshB           | 284 | AGATGAAGTGCCTTT | 298 (-4293 bp) |
| <i>Rattus norvegicus</i> TshB      | 284 | AAATGAAGTGCCTTT | 298 (-3904 bp) |
| <i>Cavia porcellus</i> TSHB        | 281 | AAATGAAACACTTTT | 295 (-3785 bp) |
| <i>Oryctolagus cuniculus</i> TSHB  | 288 | GAGTGCAGTGTCTT  | 302 (-4215 bp) |
| <i>Tursiops truncatus</i> TSHB     | 292 | AAATGAAATGTTGTT | 306 (-4111 bp) |
| <i>Bos taurus</i> TSHB             | 290 | AAACGAAATGTTGCT | 304 (-4224 bp) |
| <i>Vicugna pacos</i> TSHB          | 292 | AAATGAAATGTTGCT | 306 (-3975 bp) |
| <i>Equus caballus</i> TSHB         | 291 | AAATGAAATGTTCTT | 305 (-3747 bp) |
| <i>Canis lupus familiaris</i> TSHB | 294 | AAATGAAACATCTT  | 308 (-2900 bp) |
| <i>Myotis lucifugus</i> TSHB       | 286 | AAATGAAATGTTCTT | 300 (-3969 bp) |
| <i>Dasybus novemcinctus</i> TSHB   | 292 | AAATGAAATGTTCTT | 306 (-2387 bp) |
| <i>Loxodonta africana</i> TSHB     | 279 | TAGTGAATGTTCTT  | 293 (-4300 bp) |

# B

|                                    |   | 10                                                                | 20 | 30 | 40 | 50 | 60 |  |
|------------------------------------|---|-------------------------------------------------------------------|----|----|----|----|----|--|
| <i>Homo sapiens</i> FSHB           | 1 | GCAATACTTGGAAAGGACTCTGAATTTCCCTGATTTAAAGATACAAAAGAAAAATCTGGA-     | 59 |    |    |    |    |  |
| <i>Pan troglodytes</i> FSHB        | 1 | GCAATACTTGGAAAGGACTCCGAATTTCCCTGATTTAAAGATACAAAAGAAAAATATGGA-     | 59 |    |    |    |    |  |
| <i>Pongo abelii</i> FSHB           | 1 | GCAATACTTGGAAAGGACTCTGAATTTCCCTGATTTAAACATACAAAAGAAAAATCTGTA-     | 59 |    |    |    |    |  |
| <i>Nomascus leucogenys</i> FSHB    | 1 | GCAATACTTGGAAAGGACTCTGAATTTCCCTGATTTAAAGATACAAAAGAAAAATCTGGA-     | 59 |    |    |    |    |  |
| <i>Macaca mulatta</i> FSHB         | 1 | GCAATACTTGGAAAGGACTCTGAATTTCCCTGATTTAAAGATACAAAAGAAAAATCTGGA-     | 59 |    |    |    |    |  |
| <i>Callithrix jacchus</i> FSHB     | 1 | GCAATACTTGGAAAGGACTCTGAATTTCCCTGATTTAAAGATACAAAAGAAAAATCTGGA-     | 59 |    |    |    |    |  |
| <i>Mus musculus</i> FshB           | 1 | GCAATGTTTCAGAAAGGATTCCTGAGTTCGCCAAGTTAAAGATCAGAAAGAATAGTCTAGAC    | 60 |    |    |    |    |  |
| <i>Rattus norvegicus</i> FshB      | 1 | GCAATGCTCAGAAAGGATTCCTGAGTTCCTCAAGTTAAAGATCAGAAAGAAGTCTAGAC       | 60 |    |    |    |    |  |
| <i>Cavia porcellus</i> FSHB        | 1 | GCAATATTTAGAA--GGATTCT--AATTTACCAAGTTAAAGATTGAAA--AACA--CCTAGA-   | 55 |    |    |    |    |  |
| <i>Oryctolagus cuniculus</i> FSHB  | 1 | GCAATACCAGCAAAGGATTTTGAATTTCCCAAGTTAAAGATACAAAAGAGAAACCCGAA-      | 59 |    |    |    |    |  |
| <i>Bos taurus</i> FSHB             | 1 | GCAATACTTGAAGAATTCCTGAATTTCCCAAGTTAAAGGTACAAAAGAAAAACCCAAA-       | 59 |    |    |    |    |  |
| <i>Equus caballus</i> FSHB         | 1 | GCAATATTTGAAATGATTCTGAATTTCCCCCTGTTAAAGATACAAAAGAAAAATCTAGC-      | 59 |    |    |    |    |  |
| <i>Canis lupus familiaris</i> FSHB | 1 | CCGATACTTGGAAAGGATCCTGAATTTCCCGGAGTTGAAGGCGCAAAGAGAAACCTAGA-      | 59 |    |    |    |    |  |
| <i>Myotis lucifugus</i> FSHB       | 1 | GCAATATTTGAAAGGATTCCTGAATTTCCCAAGTTAAAGATACAAAGGAAAAACCTAGA-      | 59 |    |    |    |    |  |
| <i>Pteropus vampyrus</i> FSHB      | 1 | GCAACACTTG-AA--GGATTCTGAATTTCTCAAGTTAAAGATACAGAAAGAAAAACCTAGA-    | 57 |    |    |    |    |  |
| <i>Sorex araneus</i> FSHB          | 1 | GCAATACTT--AA--TTTGT--TAAT--CCC--GAGTTAAAGAA--ACAAAAGAAAAACCTAGA- | 52 |    |    |    |    |  |
| <i>Dasyurus novemcinctus</i> FSHB  | 1 | GCAACACTTGGAAATGATTCTGA--T--CCCAAGTT-----AAAACCTAGA-              | 43 |    |    |    |    |  |
| <i>Choloepus hoffmanni</i> FSHB    | 1 | GCAATTTCTCAAAGGATTCCTGAGTTCCTGAGTTAAAGGTAAAAGAAAAATCTAGA-         | 59 |    |    |    |    |  |
| <i>Loxodonta africana</i> FSHB     | 1 | GCAATACTTGGAAAGGATT--GAATTCCTGAGTTAAAGACAGAAAAGAAAAACTCAGA-       | 57 |    |    |    |    |  |

CCCCCCCCC

|                                    |    | 70                                                            | 80  | 90 | 100 | 110 | 120 |  |
|------------------------------------|----|---------------------------------------------------------------|-----|----|-----|-----|-----|--|
| <i>Homo sapiens</i> FSHB           | 60 | -----GTCACAATTAATTTGAGAAGGTAAGGAGTGGGTGTGCTACTGTATCAAATTTA    | 113 |    |     |     |     |  |
| <i>Pan troglodytes</i> FSHB        | 60 | -----GTCACAATTAATTTGAGAAGGTAAGGAGTGGGTGTGCTACTGTATCAAATTTA    | 113 |    |     |     |     |  |
| <i>Pongo abelii</i> FSHB           | 60 | -----GTCACAATTAATTTGAGAAGGTAAGGAGTGGGTGTGCTACTGTATCAAATTTA    | 113 |    |     |     |     |  |
| <i>Nomascus leucogenys</i> FSHB    | 60 | -----GTCACAATTAATTTGAGAAGGTAAGGAGTGGGTGTGCTACTGTATCAAATTTA    | 113 |    |     |     |     |  |
| <i>Macaca mulatta</i> FSHB         | 60 | -----GTCACAATTAATTTGAGAAGGTAAGGAGTGGGTGTGCTACTGTATCAAATTTA    | 113 |    |     |     |     |  |
| <i>Callithrix jacchus</i> FSHB     | 60 | -----GCCACATTTAATTTGACAAGGTAAGGAGTGGGTGTGCTACTGTATCAAATTTA    | 113 |    |     |     |     |  |
| <i>Mus musculus</i> FshB           | 61 | TCTAGAGTACATTTAATTT--ACAAGGTGAGGAGTGGGTGTGCTGCCATATCAGATTCG   | 119 |    |     |     |     |  |
| <i>Rattus norvegicus</i> FshB      | 61 | TCTAGAGGCACATTTAATTTTAGCAAGGTGAAGGAGTGGGTGTGCTGCCATATCAGATTCG | 120 |    |     |     |     |  |
| <i>Cavia porcellus</i> FSHB        | 56 | -----GTCACATTTAATTTGACAAGGTAAGGTGTTGGGTGTGCGAGTGTATCATTTA     | 109 |    |     |     |     |  |
| <i>Oryctolagus cuniculus</i> FSHB  | 60 | -----GTCACATTTAACTTGACAAGGTAAGGAGTGGGTGTGCTACTATATCAAATTTA    | 113 |    |     |     |     |  |
| <i>Bos taurus</i> FSHB             | 60 | -----GTCAAATTTAATTTGACAAGGTAAGGAGTGGGTGTCTACTATATCAAATTTA     | 113 |    |     |     |     |  |
| <i>Equus caballus</i> FSHB         | 60 | -----ATCACATTTAACTTGACAAGGTAAGGAGTGGGTGTGCTCCATACCAATCTTA     | 113 |    |     |     |     |  |
| <i>Canis lupus familiaris</i> FSHB | 60 | -----GTCACATTTAACTTGACAAGGTAAGGAGTGGGTGTGCTCCGGTATCAAATTCG    | 113 |    |     |     |     |  |
| <i>Myotis lucifugus</i> FSHB       | 60 | -----GTCACATTTAATTTGACAAGGTAAGGAGTGGGTGTGCTACTATATCAAATTTA    | 113 |    |     |     |     |  |
| <i>Pteropus vampyrus</i> FSHB      | 58 | -----GTCACATTTAATTTGGCAAAGTAAAGGAGTGGGTGTGCTTCTATATCAAATTTA   | 111 |    |     |     |     |  |
| <i>Sorex araneus</i> FSHB          | 53 | -----GTCGTATTTAATTTAAGCAGGTAAGGAGTGGGCGTACCCTATATCAAATTTA     | 106 |    |     |     |     |  |
| <i>Dasyurus novemcinctus</i> FSHB  | 44 | -----GTCACATTTAATTTAGCAAGGTAAGGAGTAGGTGTGCAATATATCAAATTTA     | 97  |    |     |     |     |  |
| <i>Choloepus hoffmanni</i> FSHB    | 60 | -----GTCACATTTAATTTAGACAAGGTAAGGAGTGGGTGTGCTACTATATCAAATTTA   | 113 |    |     |     |     |  |
| <i>Loxodonta africana</i> FSHB     | 58 | -----GTCACATTTAATTTGACAAGGTAAGGAGTGGGTGTGCTACTATCAAATTTA      | 111 |    |     |     |     |  |

BBBBBBB

AAAAAAA

|                                    |     | 130                                                          | 140 | 150 | 160 | 170 | 180 |  |
|------------------------------------|-----|--------------------------------------------------------------|-----|-----|-----|-----|-----|--|
| <i>Homo sapiens</i> FSHB           | 114 | ATTTGTACAAAATC-ATCATCTCTAGTAACATTA-TTTTTTCTAATCTACTGCGTTTAGA | 171 |     |     |     |     |  |
| <i>Pan troglodytes</i> FSHB        | 114 | ATTTGTACAAAATC-ATCATCTCTGGTAACATTA-TTTTTTCTAATCTACTGCGTTTAGA | 171 |     |     |     |     |  |
| <i>Pongo abelii</i> FSHB           | 114 | ATTTGTACAAAATC-ATCATCTCTGGTAACGTTA-TTTTTTCTAATCTACTGCGTTTAGA | 171 |     |     |     |     |  |
| <i>Nomascus leucogenys</i> FSHB    | 114 | ATTTGTACAAAATC-ATCATCTCTGGTAACATTA-TTTTTTCTAATCTACTGCGTTTAGA | 172 |     |     |     |     |  |
| <i>Macaca mulatta</i> FSHB         | 114 | ATTTGTACAAAATC---ATCTCTGGTAACATTA-TTTTTTCTAATCTACTGCGTTTAGA  | 168 |     |     |     |     |  |
| <i>Callithrix jacchus</i> FSHB     | 114 | ATTTGTACAAAATC-ATCATCTCTGGTGACATTA-TTGTCTCTAATCTACTGCGTTTAGA | 171 |     |     |     |     |  |
| <i>Mus musculus</i> FshB           | 120 | GTTTGTACAGAAACCATCATCACTGATAGCA-----TTTTCTGCTCTGTGGCATTAGA   | 173 |     |     |     |     |  |
| <i>Rattus norvegicus</i> FshB      | 121 | GTTTGTACAGAAACCATCATCACTAAGAGCA-----TTTTCTGCTCTGTGGCATTAGA   | 174 |     |     |     |     |  |
| <i>Cavia porcellus</i> FSHB        | 110 | ATTTGTACTCCGTC-GTCGCCCTGTATAACATTA-TTTTTTCTGATCCACTCCGTTTAGA | 167 |     |     |     |     |  |
| <i>Oryctolagus cuniculus</i> FSHB  | 114 | ATTTGTACAAAATC---ACCCTGGTAACATCA-GTTTTCTGTATCCACTGCGTTTAGA   | 168 |     |     |     |     |  |
| <i>Bos taurus</i> FSHB             | 114 | ATCTGTACAAAATC---ATCTCTGGTAACATTA-TTGTCCCGATCTACTGCGTTTAGA   | 168 |     |     |     |     |  |
| <i>Equus caballus</i> FSHB         | 114 | ATTTGTACAAAATC-ACCGTCTCTGGTAACGTTT-TTTTTCCCGATGACTGCGTTTAGA  | 171 |     |     |     |     |  |
| <i>Canis lupus familiaris</i> FSHB | 114 | CTTTGTACAGAATC-TCCATCCCTGGTAGTGTG-TTTTTCCCGATGAGCCGCGTTTAGA  | 171 |     |     |     |     |  |
| <i>Myotis lucifugus</i> FSHB       | 114 | ATTTGTATAAAATC-ATCATCTCTGGTAACATTA-TTTTTTCTGATCTATTTGTTTAGA  | 171 |     |     |     |     |  |
| <i>Pteropus vampyrus</i> FSHB      | 112 | ATTTGTACAAAATC-ATCATCTCTGGTAACATTA-TTTTTTCTGATCTACTTTGTTTAGA | 169 |     |     |     |     |  |
| <i>Sorex araneus</i> FSHB          | 107 | ACTTGTACAGACTCAACTATCTCTGGTAACA-----TGTTTCTAATCTACTGCGTTTAGA | 161 |     |     |     |     |  |
| <i>Dasyurus novemcinctus</i> FSHB  | 98  | ATTTGTATAAAATC-ATCATCTCTAGTAACATTA-TTTTTCTGATCTACTGAGTTTAGA  | 155 |     |     |     |     |  |
| <i>Choloepus hoffmanni</i> FSHB    | 114 | GTTTGTACAAAATC-CTCATCTCTGGTAACATTA-TTTTTCTGATCTGCTGCGTTTAGA  | 171 |     |     |     |     |  |
| <i>Loxodonta africana</i> FSHB     | 112 | ATTTGTACAAAATC-ATCATCTCAGGTAACATTA-TTGTCTCTAATCTTCTGCGTTTAGA | 169 |     |     |     |     |  |

AA

|                                    |     | 190                                                            | 200 | 210 | 220 | 230 | 240 |     |
|------------------------------------|-----|----------------------------------------------------------------|-----|-----|-----|-----|-----|-----|
| <i>Homo sapiens</i> FSHB           | 172 | CTACTTTAGTAAAGCTTGATCTCCCTGTCTATCTAAACACTGATTCACTTACAGCAAGCT   |     |     |     |     |     | 231 |
| <i>Pan troglodytes</i> FSHB        | 172 | CTACTTTAGTAAAGCTTGATCTCCCTGTCTATCTAAACACTGATTCACTTACAGCAAGCT   |     |     |     |     |     | 231 |
| <i>Pongo abelii</i> FSHB           | 172 | CTACTTTAGTAAAGCTTGATCTCCCTGTCTATCTAAACACTGATTCACTTACAGCAAGCT   |     |     |     |     |     | 231 |
| <i>Nomascus leucogenys</i> FSHB    | 173 | CTACTTTAGTAAAGCTTGATCTCCCTGTCTATCTAAACACTGATTCACTTACAGCAAGCT   |     |     |     |     |     | 232 |
| <i>Macaca mulatta</i> FSHB         | 169 | CTACTTTAGTAAAGCTTGATCTCCCTGTCTATCTAAACACTGATTCACTTACAGCAAGCT   |     |     |     |     |     | 228 |
| <i>Callithrix jacchus</i> FSHB     | 172 | CTACTTTAGCAAAGCTTGATCTCCCTGTCTATCTAAACAGTGATTCACTTACAGCAAGCT   |     |     |     |     |     | 231 |
| <i>Mus musculus</i> FshB           | 174 | CTGCTTTGGCGAGGCTTGATCTCCCTGTCCGCTAAACAATGATTCCTTTTCAGCAGGCT    |     |     |     |     |     | 233 |
| <i>Rattus norvegicus</i> FshB      | 175 | CTGCTTTGGCGAGGCTTGATCTCCCTGTCCGCTAAACAATGATTCCTTTTCAGCAGGCT    |     |     |     |     |     | 234 |
| <i>Cavia porcellus</i> FSHB        | 168 | CTACTTTTCATAAAACCTGATCTCCCTGTCTGTCTAAACACTGATTCACTTGCAGCAAGC-  |     |     |     |     |     | 226 |
| <i>Oryctolagus cuniculus</i> FSHB  | 169 | CTACTTTAGCAAAGGCTTGATCTCCCTGTCTGTCTAAACACTGATTCACTTACAGCAAGCA  |     |     |     |     |     | 228 |
| <i>Bos taurus</i> FSHB             | 169 | CTACTTTAGTAAAGGCTTGATCTCCCTGTCTATCTAAACACTGATTCACTTACAGCAAGCT  |     |     |     |     |     | 228 |
| <i>Equus caballus</i> FSHB         | 172 | CTATTTTCAGGAAGACTTGATCTCCCTGTCTGTCTAAACACTGATTCACTTACAGCAAGCT  |     |     |     |     |     | 227 |
| <i>Canis lupus familiaris</i> FSHB | 172 | CTACGTCCTCAAGGCTTGATCTCCCTGTCTCAACCAACACTGATTCACTTACAGCGGGCG   |     |     |     |     |     | 231 |
| <i>Myotis lucifugus</i> FSHB       | 172 | CTACTTTAGTAAAGGCTTGATCTCCCTGTCTATCTAAACACTGATTCACTTACAGCAAGCT  |     |     |     |     |     | 231 |
| <i>Pteropus vampyrus</i> FSHB      | 170 | CTACTTTAGTAAAGGCTTG-TCTCCCTTCTCTATCTAAACACTGATTCACTTACAGCAAGCT |     |     |     |     |     | 228 |
| <i>Sorex araneus</i> FSHB          | 162 | CTACTTTGGTAAAGGTTTGATCTCCCTGTCTATCTAAACACTGATTCACTTTCAG-AAAGCA |     |     |     |     |     | 220 |
| <i>Dasyurus novemcinctus</i> FSHB  | 156 | CTAATTTAGT-AGGCTTGATCTCCCTGTCTACTAAACACTGGTTCACTTACAACAAGCT    |     |     |     |     |     | 214 |
| <i>Choloepus hoffmanni</i> FSHB    | 172 | CTACTTTAGTAAAGGCTTGATCTCCCTGTCTGTCTAAACACTGATTCACTTACAGCAAGCT  |     |     |     |     |     | 231 |
| <i>Loxodonta africana</i> FSHB     | 170 | CTACTTCAGGAATCTTGATCTCCCTGTCTAGCTAAACAGCGATTACTTACAGCAGCT      |     |     |     |     |     | 229 |

|                                    |     | 250                                                       | 260 | 270 | 280 | 290 | 300 |     |
|------------------------------------|-----|-----------------------------------------------------------|-----|-----|-----|-----|-----|-----|
| <i>Homo sapiens</i> FSHB           | 232 | TCAGGCTAGCATTTGGTCATATTAATACCCAACAATCCACAAGGTG----        |     |     |     |     |     | 287 |
| <i>Pan troglodytes</i> FSHB        | 232 | TCAGGCTAGCATTTGGTCATATTAATACCCAACAATCCACAAGGTG----        |     |     |     |     |     | 287 |
| <i>Pongo abelii</i> FSHB           | 232 | TCAGGCTAGCATTTGGTCATATTAATACCCAACAATCCACAAGGTG----        |     |     |     |     |     | 287 |
| <i>Nomascus leucogenys</i> FSHB    | 233 | TCAGGCTAGCATTTGGTCATATTAATACCCAACAATCCACAAGGTG----        |     |     |     |     |     | 288 |
| <i>Macaca mulatta</i> FSHB         | 229 | TCAGGCTAGCATTTGGTCATATTAATACCCAACAATCCACAAGGTG----        |     |     |     |     |     | 284 |
| <i>Callithrix jacchus</i> FSHB     | 232 | TCAGGCTAGCATTTGACCATATTAATACCCAACAATTTCTCAAGGTG----       |     |     |     |     |     | 287 |
| <i>Mus musculus</i> FshB           | 234 | TTATGTTGGTATTTGGTCATGTTAACACCCAGTAAATCCACAGGGTT----       |     |     |     |     |     | 282 |
| <i>Rattus norvegicus</i> FshB      | 235 | TTGTGTTGGTATTTGGTCACGTTAACACCCAGTAAATCCATGGGGTG----       |     |     |     |     |     | 283 |
| <i>Cavia porcellus</i> FSHB        | 227 | -----AGACTAATACCCAGTAACTCCACAAGGTG----                    |     |     |     |     |     | 265 |
| <i>Oryctolagus cuniculus</i> FSHB  | 229 | TCAGGTTAGCATTCGATTATACTAATACCCAACAATCCACGAACTG----        |     |     |     |     |     | 284 |
| <i>Bos taurus</i> FSHB             | 229 | TCAAGCTAACCTGGCTCTTACTAATACCCAACAATCCACAAGGTTAGTTAGTTTCAC |     |     |     |     |     | 288 |
| <i>Equus caballus</i> FSHB         | 228 | TTGGACTAACCTGGCTCATTAATACCCGACAAATCCACAAGGTTATTTGGTTTCAC  |     |     |     |     |     | 287 |
| <i>Canis lupus familiaris</i> FSHB | 232 | TCAGGCTAACCTGGCTCTAGCTAATACCCAGCAAGTCCACAAGGTG----        |     |     |     |     |     | 287 |
| <i>Myotis lucifugus</i> FSHB       | 232 | TCAGGATAACACTGGTCTTATTAATTCCTGATAAATCCACAAGGTG----        |     |     |     |     |     | 287 |
| <i>Pteropus vampyrus</i> FSHB      | 229 | GCAGGCTAACCTGGTCTT-TCAATACCTGCCAAATCCACAAGGTG----         |     |     |     |     |     | 283 |
| <i>Sorex araneus</i> FSHB          | 221 | TCAGGATAACACTGGTTCATATTAATACCCAACAATCCAGTAGGTG----        |     |     |     |     |     | 276 |
| <i>Dasyurus novemcinctus</i> FSHB  | 215 | TCAGGCTAGCATTTGGTCATATTCATATCCAACAATCCACAGGGTA----        |     |     |     |     |     | 270 |
| <i>Choloepus hoffmanni</i> FSHB    | 232 | TTAGGCTAGCATTTGGTCATGTTAATACCCAACAATCCGCAAAATG----        |     |     |     |     |     | 287 |
| <i>Loxodonta africana</i> FSHB     | 230 | TCAGGCCAGCATTTGGTCACACTAATCCCAACAATCCACAAGGTG----         |     |     |     |     |     | 285 |

|                                    |     | 310                                                           | 320 | 330 | 340 | 350 | 360 |     |
|------------------------------------|-----|---------------------------------------------------------------|-----|-----|-----|-----|-----|-----|
| <i>Homo sapiens</i> FSHB           | 288 | ATGATTTTGTATAAAAAG-----GTGAAC-TGAGATTTTCATTCAGTCTACAGGTC---   |     |     |     |     |     | 335 |
| <i>Pan troglodytes</i> FSHB        | 288 | ATGATTTTGTATAAAAAG-----GTGAAC-TGAGATTTTCATTCAGTCTACAGGTC---   |     |     |     |     |     | 335 |
| <i>Pongo abelii</i> FSHB           | 288 | ATGATTTTGTATAAAAAG-----GTGAAC-TGAGATTTTCATTCAGTCTACAGGTC---   |     |     |     |     |     | 335 |
| <i>Nomascus leucogenys</i> FSHB    | 289 | ATGATTTTGTATAAAAAG-----GTGAAC-TGAGATTTTCATTCAGTCTACAGGTC---   |     |     |     |     |     | 336 |
| <i>Macaca mulatta</i> FSHB         | 285 | ATGATTTTGTATAAAAAG-----GTGAAC-TGAGATTTTCATTCAGTCTACAGGTC---   |     |     |     |     |     | 332 |
| <i>Callithrix jacchus</i> FSHB     | 288 | ATAATTTTGTATAAAAAG-----GTGAAC-TGAGATTTTCATTCAGTCTACAGGTC---   |     |     |     |     |     | 335 |
| <i>Mus musculus</i> FshB           | 283 | ---AGITTTGTATAAAAAG-----ATCAGG-TGTAACCTTGACTCAGTGTTCAGGTT---  |     |     |     |     |     | 327 |
| <i>Rattus norvegicus</i> FshB      | 284 | ---GGATTTGTATAAAAAG-----ATCAGG-TGTGACTTGATTTCAGTGTTCAGGTT---  |     |     |     |     |     | 328 |
| <i>Cavia porcellus</i> FSHB        | 266 | ACAGITTTTGTATAAAAAG-----GTGAAC-TCTGGCTTGACTCGGTCCATAGGTTCCCT  |     |     |     |     |     | 316 |
| <i>Oryctolagus cuniculus</i> FSHB  | 285 | ATGATTTTGTATAAAAAGCTGACCGAATGAAC-TGAAACTTGCTTCAGTCTACAGTTT--- |     |     |     |     |     | 340 |
| <i>Bos taurus</i> FSHB             | 289 | ACAATTTTGTATAAAAAG-----GTGAAC-TGAGACTAGACTCAG-CTACAGGTT---    |     |     |     |     |     | 335 |
| <i>Equus caballus</i> FSHB         | 288 | ACGATTTTGTATAAAAAG-----GTGAAC-TGAGACCCGACTCACACCACAGGTT---    |     |     |     |     |     | 335 |
| <i>Canis lupus familiaris</i> FSHB | 288 | GGGATTTTGTATAAAAAG-----GTGAGC-TGAGACCTGACTCGGTCCACAGGTT---    |     |     |     |     |     | 335 |
| <i>Myotis lucifugus</i> FSHB       | 288 | ACAATATTGTATAAAAAG-----GTGAAC-TGAGACTTAACCTCAGTCTACAGGTT---   |     |     |     |     |     | 335 |
| <i>Pteropus vampyrus</i> FSHB      | 284 | ACAATTTTGTATAAAAAG-----GTGAAC-TGAGACTTAACACAGTCTAAAGGTT---    |     |     |     |     |     | 331 |
| <i>Sorex araneus</i> FSHB          | 277 | ACAATTTTGTATAAAAAG-----AA-GATAAG-TGAGAC--AGTCAATCTGCAGGTT---  |     |     |     |     |     | 324 |
| <i>Dasyurus novemcinctus</i> FSHB  | 271 | GCGATTTTGTATAAAAAG-----GTGAACCTTGAGAGTTGACTTAATCTACAGGTT---   |     |     |     |     |     | 319 |
| <i>Choloepus hoffmanni</i> FSHB    | 288 | GTGAATTTTGTATAAAAAG-----GTGAACCTTGAGAGTTGACTTCATCTACAGGTT---  |     |     |     |     |     | 336 |
| <i>Loxodonta africana</i> FSHB     | 286 | ATGATTTTGTATAAAAAG-----GGCAGCTTGAGGCTTGACGCTCAGTCTACAGGTT---  |     |     |     |     |     | 334 |

DDDD

|                                    |     | 370                    | 380                    | 390              | 400 | 410 |     |
|------------------------------------|-----|------------------------|------------------------|------------------|-----|-----|-----|
| <i>Homo sapiens</i> FSHB           | 336 | TTGCCAGGCAAGGCAGCCGAC  | --CACAGGTGAGTCTTGGC    | ATCTACCGTTTTCAAG |     |     | 389 |
| <i>Pan troglodytes</i> FSHB        | 336 | TTGCCAGGCAAGGCAGCCGAC  | --CACAGGTGAGTCTTGGC    | ATCTACCGTTTTCAAG |     |     | 389 |
| <i>Pongo abelii</i> FSHB           | 336 | TTGCCAGGCAAGGCAGCCGAC  | --CACAGGTGAGTCTTGGC    | ATCTACAGTTTTCAAG |     |     | 389 |
| <i>Nomascus leucogenys</i> FSHB    | 337 | TTGCCAGGCAAGGCAGCCAAC  | --CACAGGTGAGTCTTGGC    | ATCTACAGTTTTCAAG |     |     | 390 |
| <i>Macaca mulatta</i> FSHB         | 333 | TTCCCAGGCAAGGCAGCCGAC  | --CACAGGTGAGTCTTAGC    | ATCTACAGTTTTCAAG |     |     | 386 |
| <i>Callithrix jacchus</i> FSHB     | 336 | TTCCCAGGCAAGGCAGCCGAC  | --CACAGGTGAGTCTTCGC    | ATCTATAGTTTGCAAG |     |     | 389 |
| <i>Mus musculus</i> FshB           | 328 | TCCCAGAGAGACAGCTGACTG  | CACAGGTGAGTAGCAGCACT   | TGATGC-AACAAG    |     |     | 382 |
| <i>Rattus norvegicus</i> FshB      | 329 | TCCCAGGAGAGATAGCCAAC   | TGCACAGGTGAGTTTCAGCACT | TGGTGC-AGCAAG    |     |     | 383 |
| <i>Cavia porcellus</i> FSHB        | 317 | TCTCCGTCCAAACAGCCAGT   | --CACAGGTGAGTCTGGGG    | ACTT-CTGTTAGCCAG |     |     | 369 |
| <i>Oryctolagus cuniculus</i> FSHB  | 341 | TCCCAGACAAGGCAGCCAAC   | --CACAGGTGAGTCTTGGC    | ATTT--GGTTATTAG  |     |     | 392 |
| <i>Bos taurus</i> FSHB             | 336 | TCCCAGACAAGGCAGCTGTC   | --TACGGAAAAGTCTCAGCACT | TACAGTTATCAAG    |     |     | 389 |
| <i>Equus caballus</i> FSHB         | 336 | TCCTCAGACAAGGCAGCTGAC  | --CACAGGTGAGTCGCGGC    | ATCTAAGTATCAAG   |     |     | 389 |
| <i>Canis lupus familiaris</i> FSHB | 336 | TCTCCGACGCGGCTGCTGAC   | --CAAAGGTGAGTCTTGGGG   | TGCGTTCTTACCAAG  |     |     | 389 |
| <i>Myotis lucifugus</i> FSHB       | 336 | TCCCAGACAAGGCAGTGGAC   | --CACAGGTAGTCTCAGCACCT | TATAGTTATCAAG    |     |     | 389 |
| <i>Pteropus vampyrus</i> FSHB      | 332 | TCCCAGTCAAGGCAGCCAAC   | --CACAGGTGAGTTCAGCAACT | TATAATTATCAAG    |     |     | 385 |
| <i>Sorex araneus</i> FSHB          | 325 | CTCTCAGA----GCAAGCAAC  | --CACAGGTAGTTC AACATCT | TATCGTTATCAAG    |     |     | 374 |
| <i>Dasyurus novemcinctus</i> FSHB  | 320 | TCCCAGACAAGGCAGCTGAT   | --CACAGGTGAGTCTCAGCAGC | TACAGTTATCAAG    |     |     | 373 |
| <i>Choloepus hoffmanni</i> FSHB    | 337 | TCCCAGGCAAGGCAGCACTGAA | --CACAGGTGAGTCTCAGCACT | TATGGTTATCAAG    |     |     | 390 |
| <i>Loxodonta africana</i> FSHB     | 335 | TCCCAGGCAAGGCAGCCAAC   | --GACAGGTGAGTCTCAGTATT | TATAGTTATCAAG    |     |     | 388 |

EEEEEEEEEEEE

|                                    |           |
|------------------------------------|-----------|
| <i>Homo sapiens</i> FSHB           | (-827 bp) |
| <i>Pan troglodytes</i> FSHB        | (-827 bp) |
| <i>Pongo abelii</i> FSHB           | (-965 bp) |
| <i>Nomascus leucogenys</i> FSHB    | (-817 bp) |
| <i>Macaca mulatta</i> FSHB         | (-835 bp) |
| <i>Callithrix jacchus</i> FSHB     | (-827 bp) |
| <i>Mus musculus</i> FshB           | (-631 bp) |
| <i>Rattus norvegicus</i> FshB      | (-637 bp) |
| <i>Cavia porcellus</i> FSHB        | (-690 bp) |
| <i>Oryctolagus cuniculus</i> FSHB  | (-669 bp) |
| <i>Bos taurus</i> FSHB             | (-642 bp) |
| <i>Equus caballus</i> FSHB         | (-673 bp) |
| <i>Canis lupus familiaris</i> FSHB | (-758 bp) |
| <i>Myotis lucifugus</i> FSHB       | (-848 bp) |
| <i>Pteropus vampyrus</i> FSHB      | (-645 bp) |
| <i>Sorex araneus</i> FSHB          | (-794 bp) |
| <i>Dasyurus novemcinctus</i> FSHB  | (-610 bp) |
| <i>Choloepus hoffmanni</i> FSHB    | (-622 bp) |
| <i>Loxodonta africana</i> FSHB     | (-675 bp) |



# D

|                                    |   | 10             | 20           | 30            | 40          | 50       | 60        |          |
|------------------------------------|---|----------------|--------------|---------------|-------------|----------|-----------|----------|
| <i>Homo sapiens</i> GPA1           | 1 | TGCATCTTTATTA  | AATTCAGATGCA | AAA--TTAATTTT | TAGAAAAGTCT | AAAATAGG | TGT---    | 55       |
| <i>Pan troglodytes</i> GPA1        | 1 | TGCATCTTTATTA  | AATTCAGATGCA | AAA--TTAATTTT | TAGAAAAGTCT | AAAATAGG | CGT---    | 55       |
| <i>Pongo abelii</i> GPA1           | 1 | TGCATCTTTATTA  | AATTCAGATGCA | AAA--TTAATTTT | TAGAAAAGTCT | AAAATAGG | CAT---    | 55       |
| <i>Nomascus leucogenys</i> GPA1    | 1 | TACATCTTTATTA  | AATTCAGATGCA | AAA--TTAATTTT | TAGAAAAGTCT | AAAATAGG | CGT---    | 55       |
| <i>Callithrix jacchus</i> GPA1     | 1 | TGCATCTTTATTA  | AATTCAGATGCA | CG--TTAATTTT  | TAGAAAAGTCT | AAAATAGG | CAT---    | 55       |
| <i>Otolemur garnettii</i> GPA1     | 1 | TTTCATCTTTATTA | AATTCAGATGCA | CA--TTAATTTT  | TAGAAAAGTCT | AAAGTAA  | ACCA---   | 55       |
| <i>Mus musculus</i> GpA1           | 1 | TATATCTTTATTA  | AATTCAGATGCT | GTG--TTAA--   | TTAAGAAA--  | TTG----  | GAGCAA--- | 49       |
| <i>Rattus norvegicus</i> GpA1      | 1 | TGTATCTTTATTA  | AATTCAGATGCA | CA--TTAATTTT  | TAAGAAA--   | TGG----  | AAGCGA--- | 50       |
| <i>Cavia porcellus</i> GPA1        | 1 | GGCATCTCTATG   | AAACCCAGCT   | GCTGCTCA--    | TTAATTTT    | CATAAAGT | CCAAGTAG  | CA----   |
| <i>Oryctolagus cuniculus</i> GPA1  | 1 | TGCATGTTTATTA  | AATGCAGAGGC  | ACATATTAAT    | TTTATAGACA  | AGTCTAAA | ATAGGTAT  | TAT      |
| <i>Bos taurus</i> GPA1             | 1 | TGCATCCTTATTA  | AAAACCTGAT   | GCACAT--      | TTAATTTT    | TAGAAGAG | TCTAAATAT | TGTGT--- |
| <i>Equus caballus</i> GPA1         | 1 | TGCATCCTTATTA  | AAAATCCA     | AATGCTCAT--   | TTAATTTT    | TAGAAAAG | TCTAAATGG | TAT---   |
| <i>Canis lupus familiaris</i> GPA1 | 1 | TGCATCCTTATTA  | AAAATCCA     | AATACATAC--   | TTAATGTT    | TAGAAAAG | TTAAATAG  | GTAT---  |
| <i>Myotis lucifugus</i> GPA1       | 1 | TGCATCCTTATTA  | AAAATCCAGAT  | TACCT--       | TTGATTTT    | TGAAAAGT | TCTAAACAG | GCAT---  |
| <i>Dasyurus novemcinctus</i> GPA1  | 1 | TGTGTCCTTCA    | TAAATCCAGAT  | GCACA--       | TTAATTTT    | TGAAAAGT | TCTAAATA  | AGCAT--- |
| <i>Loxodonta africana</i> GPA1     | 1 | TGCAT--TTTAT   | TGAATCAAGAT  | ACACA--       | TTAATTTT    | TGAAAAGT | TCTAAATAG | GCAT---  |
| <i>Procapra capensis</i> GPA1      | 1 | TGCAT--CTTAT   | TGAATCAAGAT  | ACACA--       | TTAATCTT    | TGAAAAGT | TCTAAATAG | GCAT---  |

|                                    |    | 70            | 80         | 90           | 100         | 110        | 120   |     |
|------------------------------------|----|---------------|------------|--------------|-------------|------------|-------|-----|
| <i>Homo sapiens</i> GPA1           | 56 | GTGTTTATTTTT  | CTGTTTCCTA | ATAAATAGTG   | ----GTATAAG | CCTGGAAAT  | GCTCT | 110 |
| <i>Pan troglodytes</i> GPA1        | 56 | GTGTTTATTTTT  | CTGTTTCCTA | ATAAATAGTG   | ----GTATAAG | CCTGGAAAT  | GCTCT | 110 |
| <i>Pongo abelii</i> GPA1           | 56 | GTGTTTATTTTT  | CTGTTTCCTA | ATAAATAGTG   | ----GCATAAG | CCTGGAAAT  | GCTCT | 110 |
| <i>Nomascus leucogenys</i> GPA1    | 56 | GTGTTTATTTTT  | CTGTTTCCTA | ATAAATAGTG   | ----GTACAAG | CCTGGAAAT  | GCTCT | 110 |
| <i>Callithrix jacchus</i> GPA1     | 56 | GTGTTTATTTTT  | CTGTTTCCTA | ATAAATAGTG   | ----GTATAAG | CCTGGAAAT  | GCTCT | 114 |
| <i>Otolemur garnettii</i> GPA1     | 56 | CAGTTTATTTTT  | CTGTTTCCTA | CTGGAATAATG  | ----TTGTAAG | TCTGGAAAT  | GCTCT | 110 |
| <i>Mus musculus</i> GpA1           | 50 | TTGTTTATTTTT  | CTGTTTCCTG | TGAAATAATG   | -----       | -----      | ----- | 83  |
| <i>Rattus norvegicus</i> GpA1      | 51 | GTGTTTACTTTT  | CTGTTTCCTG | TGGAATAACG   | -----       | -----      | ----- | 84  |
| <i>Cavia porcellus</i> GPA1        | 55 | ---TGTTATTTTT | CTGTTTCCTA | CTGGAATAACT  | -----GTAA   | CCTTGAAAT  | GCTCC | 104 |
| <i>Oryctolagus cuniculus</i> GPA1  | 61 | GTGTTTATTTTT  | CTGTTTCCTA | CTGGAATAAT   | ----TTGTAAG | CCTGGAAAT  | GAC-  | 114 |
| <i>Bos taurus</i> GPA1             | 57 | ATGTTTCTTTTT  | CTGTTTCTA  | CTGGGATAATG  | ----TTGTAAG | CCTAGAAAT  | GCTCT | 111 |
| <i>Equus caballus</i> GPA1         | 57 | GTGTTTATTTTT  | CTGTTTCCTG | CTGGAACAATG  | ----TTGTAAG | CCTGGAAAT  | TTCT  | 111 |
| <i>Canis lupus familiaris</i> GPA1 | 57 | CCGTTTGGTTTT  | CTGTTTCCTA | CTAGAATAAAG  | -----TAAG   | CCTGGTAAT  | CTTT  | 108 |
| <i>Myotis lucifugus</i> GPA1       | 57 | GTGTTTATTTTT  | CTATTCCTA  | CTACGAATCATG | ----TTGCA   | CCCTGGCAAT | CTTT  | 111 |
| <i>Dasyurus novemcinctus</i> GPA1  | 56 | GTGTTTACTTTT  | CTCTTCCTA  | CTGGAATCAT   | ----TTGTAAG | CCCTGGCAAT | CTTT  | 110 |
| <i>Loxodonta africana</i> GPA1     | 55 | GTGATTAATTTTT | CTGTTTCCTA | CTGAAATAATG  | ----TTATAAG | CCTGAAAT   | GCTTT | 109 |
| <i>Procapra capensis</i> GPA1      | 55 | GTGATTAATTTTT | CTGTTTCCTG | CTGAAATCATG  | ----TTATAAG | CCTGAAAT   | GCTTT | 110 |

|                                    |     | 130         | 140        | 150             | 160         | 170            | 180     |     |
|------------------------------------|-----|-------------|------------|-----------------|-------------|----------------|---------|-----|
| <i>Homo sapiens</i> GPA1           | 111 | ATATCTATTTT | CTGAAATCTA | TAGCTCTTG       | -----TTTAGG | TAAATATCAGG    | TACTTAG | 164 |
| <i>Pan troglodytes</i> GPA1        | 111 | ATATCTATTTT | CTGAAATCTA | TAGCTCTTG       | -----TTTAGG | TAAATATCAGG    | TACTTAG | 164 |
| <i>Pongo abelii</i> GPA1           | 111 | ATATCTATTTT | CTGAAATCTA | TAGCTCTTG       | -----TTTAGG | TAAATATCAGG    | TACTTAG | 164 |
| <i>Nomascus leucogenys</i> GPA1    | 111 | ATATCTATTTT | CTGAAATCTA | TAGCTCTTG       | -----TTTAGG | TAAATATCAGG    | TACTTAG | 164 |
| <i>Callithrix jacchus</i> GPA1     | 115 | ATATCTATTTT | CTGAAATCTA | TAGCTCTTG       | -----TTTAGG | TAAATATCAGG    | TACTTAG | 168 |
| <i>Otolemur garnettii</i> GPA1     | 111 | CTATGTATTA  | CTGAAATTTA | TAGCTCTTCTCAT   | TTTGTAGTAA  | CAATCAGG       | TACTTAG | 170 |
| <i>Mus musculus</i> GpA1           | 84  | -----TAAT   | -CTGAAATG  | TTTTTTATCCT     | TGCTTTATG   | AAAATATCAGG    | TACTTAG | 137 |
| <i>Rattus norvegicus</i> GpA1      | 85  | -----TAAT   | -CTGAAA-TG | -----TTTTCT     | CTCTTTATG   | AAAACATCAGG    | CACTTAG | 133 |
| <i>Cavia porcellus</i> GPA1        | 105 | ATATCTATTA  | CTGAAGTTT  | TACAGCTCTTCTCCT | TGCTTTATG   | AAAACATCAAG    | TACTTAG | 164 |
| <i>Oryctolagus cuniculus</i> GPA1  | 115 | ---TCTATTA  | CTTAAATTTA | TAGCTCTTC---    | TGTTTTAAG   | TAAACATCAGG    | TACTTAG | 168 |
| <i>Bos taurus</i> GPA1             | 112 | CTATCTAGAA  | CTGAATTTT  | TACAGCTCTGC---  | TTTTTAAG    | TAAACATCAGG    | TACTTAG | 168 |
| <i>Equus caballus</i> GPA1         | 112 | ATATCTATTA  | CTGAAATTT  | TACAGCTCTTCCCT  | TG-AAATAAG  | TAAATATCAGG    | TACTTAG | 170 |
| <i>Canis lupus familiaris</i> GPA1 | 109 | GTATCTATTA  | CTGAAATTT  | TATAG--TTTCT    | CTCTGTTT    | CAGTAAACATCAGG | TACTTAG | 167 |
| <i>Myotis lucifugus</i> GPA1       | 112 | CTATCTG--A  | CTGAAATTT  | TACAGCTCTTCTCCT | TGCTTTAAG   | TAAACATCAGG    | TACTTAG | 169 |
| <i>Dasyurus novemcinctus</i> GPA1  | 111 | ATATCTGTTA  | CTGAAATCT  | TATCTCTTC---    | TGATTTAAG   | TAAACATTAGG    | TACTTAG | 167 |
| <i>Loxodonta africana</i> GPA1     | 110 | TTACATGTTA  | CTGAAATCT  | TGCTCTTC---     | TGTTTTAAG   | TAAACATCAAG    | TACTTAG | 166 |
| <i>Procapra capensis</i> GPA1      | 111 | ATACCTGCTA  | CTGAAATCT  | TATGCTCTTG---   | TGTTTTAAG   | TAAACATAAGG    | TACTTAG | 167 |

|                                    |     | 190            | 200            | 210           | 220      | 230       | 240   |     |
|------------------------------------|-----|----------------|----------------|---------------|----------|-----------|-------|-----|
| <i>Homo sapiens</i> GPA1           | 165 | CTAATTTAAATGTC | -----          | TCTTGTTTATAG  | --GAAAGT | GTCAGCTTT | CAGGA | 209 |
| <i>Pan troglodytes</i> GPA1        | 165 | CTAATTTAAATGTC | -----          | TCTTGTTTATAG  | --GAAAGT | GTCAGCTTT | CAGGA | 209 |
| <i>Pongo abelii</i> GPA1           | 165 | CTAATTTAAATGTC | -----          | TCTTGTTTATAG  | --GAAAGT | GTCAGCTTT | CAGGA | 209 |
| <i>Nomascus leucogenys</i> GPA1    | 165 | CTAATTTAAATGTC | -----          | TCTTGTTTATAG  | --GAAAGT | GTCAGCTTT | CAGGA | 209 |
| <i>Callithrix jacchus</i> GPA1     | 169 | CTAATTTAAATGTC | -----          | TCTTGTTTATAG  | --GAAAGT | GTCAGCTTT | CAGGA | 213 |
| <i>Otolemur garnettii</i> GPA1     | 171 | CTAATTTAAATGTG | -----          | TCTTGTTTATAG  | --GAAAGT | GTCAGCTTT | CAGGA | 215 |
| <i>Mus musculus</i> GpA1           | 138 | CTAATTTAAATGTG | CTACTC-TTAGAG  | TCTTGTTTATTTT | -AAAAGT  | GTCAGCTTT | CAGGA | 195 |
| <i>Rattus norvegicus</i> GpA1      | 134 | CTAATTTAAATGTG | CTACTC-TTAGAA  | TCTTGTTTATTTT | -AAAAGT  | GTCAGCTTT | CAGAA | 192 |
| <i>Cavia porcellus</i> GPA1        | 165 | CTAATTTAAATGTG | GATACTC-TTAGAA | CTATGTTTATAG  | --GAAAGT | GTCAGCTTT | CAGGA | 221 |
| <i>Oryctolagus cuniculus</i> GPA1  | 169 | CTAATTTAAATGTG | GATACTC-TTAAAG | TCTTGTTTATAG  | --GAAAGT | GTCAGCTTT | CAGGA | 225 |
| <i>Bos taurus</i> GPA1             | 169 | CTAATTTAAATGTG | AATACTTGTAAAG  | TCTTGTTTATAG  | --GAAAGT | GTCAGCTTT | CAGGA | 226 |
| <i>Equus caballus</i> GPA1         | 171 | CTAATTTAAATGTG | GATACTC-AAAGGG | TCTTGTTTATAG  | --GAAAGT | GTCAGCTTT | CAGGA | 227 |
| <i>Canis lupus familiaris</i> GPA1 | 168 | CTAATTTAAATGTG | GATAGTC-ATAGAG | TCTTGTTTATAG  | --AAAAGT | GTCAGCTTT | CAGGA | 224 |
| <i>Myotis lucifugus</i> GPA1       | 170 | CTAATTTAAATGTG | CAGAC-C-TTAGGG | TCTTGTTTATAG  | --GAAAGT | GTCAGCTTT | CAGGA | 225 |
| <i>Dasyurus novemcinctus</i> GPA1  | 168 | CTAATTTAAATGTG | GATACTC-TTAGGG | TCTTGTTTATAG  | --AAAAGT | GTCAGCTTT | CAGGA | 224 |
| <i>Loxodonta africana</i> GPA1     | 167 | CTAATTTAAATGTG | GATACTC-TCAGGG | -TTGTTTATAG   | --GAAAGT | GTCAGCTTT | CAGGA | 222 |
| <i>Procavia capensis</i> GPA1      | 168 | CTAATTTAAATGTG | GATGCTC-TTAGGG | TCTTGTTTATAG  | --GAAAGT | GTCAGCTTT | CAGGA | 224 |

|                                    |     | 250           | 260          | 270          | 280        | 290        | 300            |     |
|------------------------------------|-----|---------------|--------------|--------------|------------|------------|----------------|-----|
| <i>Homo sapiens</i> GPA1           | 210 | TGTTATGTGATGG | CTCAATAAAAAT | TACGTACAAA   | GTGACAGCT  | TACTCTCTTT | --TCAT         | 267 |
| <i>Pan troglodytes</i> GPA1        | 210 | TGTTATGTGATGG | CTCAATAAAAAT | TACGTACAAA   | GTGACAGCT  | TACTCTCTTT | --TCAT         | 267 |
| <i>Pongo abelii</i> GPA1           | 210 | TGTTATGTGATGG | CTCAATAAAAAT | TACGTACAAA   | GTGACAGCT  | TACTCTCTTT | --TCAT         | 267 |
| <i>Nomascus leucogenys</i> GPA1    | 210 | TGTTATGTGATGG | CTCAATAAAAAT | TACGTACAAA   | GTGACAGCT  | TACTCTCTTT | --TCAT         | 267 |
| <i>Callithrix jacchus</i> GPA1     | 214 | TGTTATGTGATGG | CTCAATAAAAAT | TACGTACAAA   | GTGACAGCT  | TACTCTCTTT | --TCAT         | 270 |
| <i>Otolemur garnettii</i> GPA1     | 216 | TGTTCTATGATGT | CTTGATAGAA   | TACGTAGAAA   | ATGAC--TGT | TCTCT--TTT | --TCAT         | 270 |
| <i>Mus musculus</i> GpA1           | 196 | TGTTTTGTGTAAG | GGTCAATAAAT  | TATACATAGAAA | ATGGCCAAAT | TCTCTCTCT  | --TCAT         | 253 |
| <i>Rattus norvegicus</i> GpA1      | 193 | TGTTTTGTGTAAG | CTCAATAAAAAT | TACGTAGAAA   | ATGGCCAAAT | TCTCTCTCT  | --TCAT         | 252 |
| <i>Cavia porcellus</i> GPA1        | 222 | TGTTTTGTGTAAG | CTTAGATAAAA  | ATACGTAGAAA  | ATGACCATGT | -CTTTCTCT  | --GTAT         | 278 |
| <i>Oryctolagus cuniculus</i> GPA1  | 226 | TGTTGTCTGTAAT | CTCAATAAAAAT | TACGTAGAAA   | ATGACAGCAT | TACTCTCTTT | --TCAT         | 283 |
| <i>Bos taurus</i> GPA1             | 227 | TGTTGTGTATAAT | CTTGAAAAAAT  | TATGTAGAAA   | ATAACAGAGT | TCTCTTGT   | --TCAT         | 284 |
| <i>Equus caballus</i> GPA1         | 228 | TGTTGTGTATAAT | CTCGATAAAAAT | TACGTAGAAA   | ATGACAGCT  | TCTCTTGT   | --TCAT         | 285 |
| <i>Canis lupus familiaris</i> GPA1 | 225 | TGTTGTATGTAAG | CTTGATAAAAAT | TACGTAGAAA   | ATGACA-TGT | TACTCTTT   | --TCAT         | 281 |
| <i>Myotis lucifugus</i> GPA1       | 226 | TGTTGTGTGTAAG | CTTGATAAAAAT | TACGTAGAAA   | ATGACTGCTG | TCTCTCTTT  | --TCAT         | 283 |
| <i>Dasyurus novemcinctus</i> GPA1  | 225 | TGTTTTGTGTAAG | CTTGATAAAAAT | TACGTAGAAA   | ATGACTGCTG | TCTCTCTTT  | --TCAT         | 282 |
| <i>Loxodonta africana</i> GPA1     | 223 | TGTTGTGTTTAA  | AGTCTTGATAA  | CACATATGT    | AGAAAACG   | ACTGCTCT   | --TCAT         | 280 |
| <i>Procavia capensis</i> GPA1      | 225 | TGTTGTTTTTAA  | AGTCTTGATAA  | CATAATGT     | AGATGAGT   | GGTGTGT--  | -TCTCTTT--TCAT | 280 |

|                                    |     | 310         | 320         | 330        | 340      | 350        | 360             |           |
|------------------------------------|-----|-------------|-------------|------------|----------|------------|-----------------|-----------|
| <i>Homo sapiens</i> GPA1           | 268 | GGGCTGACCTT | TGCTCACCAT  | CACCTGAAAA | TGGCTC   | CAAAACAAAA | --TGACCTA       | AGG 325   |
| <i>Pan troglodytes</i> GPA1        | 268 | AGGCTGACCTT | TGCTCACCAT  | CACCTGAAAA | TGGCTC   | CAAAACAAAA | --TGACCTA       | AGG 325   |
| <i>Pongo abelii</i> GPA1           | 268 | AGGCTGACCTT | TGCTCACCAT  | CACCTGAAAA | TGGCTC   | CAAAACAAAA | --TGACCTA       | AGG 325   |
| <i>Nomascus leucogenys</i> GPA1    | 268 | AGGCTGACCTT | TGCTCACCAT  | CACCTGAAAA | TGGCTC   | CAAAACAAAA | --TGACCTA       | AGG 325   |
| <i>Callithrix jacchus</i> GPA1     | 271 | AGGCTGACCTT | TGCTCACCAC  | CGCCTGAAAA | TGGCTC   | CAAAACAAAA | --TGATCTA       | AGC 328   |
| <i>Otolemur garnettii</i> GPA1     | 271 | AGGCTAACCTT | G--GTCACCAC | CGCCTGAAAA | TGGCTC   | CAAAACAAAA | ATAGGAT         | TAAGG 328 |
| <i>Mus musculus</i> GpA1           | 254 | AAGCTGTCC   | TTGAGGTC    | CACCACTAC  | CTCAAAAT | GTCTAAAA   | CAAAAC--TGATCT  | GAGG 311  |
| <i>Rattus norvegicus</i> GpA1      | 253 | AAGCTGTCC   | TTGAGGTC    | CACCACTAC  | CTCAAAAT | GTCTAAAA   | CAAAAC--TAACCT  | GAGG 310  |
| <i>Cavia porcellus</i> GPA1        | 279 | AAACTGACCTT | TGATCACTG   | TGCCTGGA   | ----GCTC | GAAACAAA   | AG--TGATCT      | GAAG 332  |
| <i>Oryctolagus cuniculus</i> GPA1  | 284 | AAGCTGACCTT | TGATCCAGC   | ACTGCTG    | GAATAA   | CTCAAAAC   | CAAAAC--TGATCT  | TAAGG 341 |
| <i>Bos taurus</i> GPA1             | 285 | AGGCTGACCTT | TGAGTCAAC   | ACCACCTG   | GAATAA   | CTCAAAAC   | CAAAAC--ATGATCT | TAAGG 343 |
| <i>Equus caballus</i> GPA1         | 286 | AGGCTGACCTT | TGAGTCAAC   | ACCACCTG   | GAATAA   | CTCAAAAC   | CAAAAC--ATGATCT | TAAGA 344 |
| <i>Canis lupus familiaris</i> GPA1 | 282 | AGGCTGACCTT | TGAGTCAAC   | ACCACCTG   | GAATAA   | CTCAAAAC   | CAAAAC--ATGATCT | TAAGG 340 |
| <i>Myotis lucifugus</i> GPA1       | 284 | AGGCTGACCTT | TGAGTCAAC   | CCGCTG     | GAATAA   | CTCAAAAC   | CAAAAC--ATGATCT | TAAGG 343 |
| <i>Dasyurus novemcinctus</i> GPA1  | 283 | AGGCTGACCTT | TGAGTCAAC   | ACCACCTG   | GAATAA   | CTCAAAAC   | CAAAAC--ATGAGCT | TAAGG 341 |
| <i>Loxodonta africana</i> GPA1     | 281 | AGGCTGACCTT | TGAGTCAAC   | ACCACCTG   | GAATAA   | CTCAAAAC   | CAAAAC--ATGATCT | TAAGG 339 |
| <i>Procavia capensis</i> GPA1      | 281 | AGGCTGACCTT | TGAGTCAAC   | ACTTCTCT   | TGAAAA   | TGACAAA    | CAAAAC--ATGCTT  | TAAGG 339 |

AAAAAAAA



|                                    |     | 370                                    | 380                 | 390   | 400   | 410 | 420 |  |
|------------------------------------|-----|----------------------------------------|---------------------|-------|-------|-----|-----|--|
| <i>Homo sapiens</i> GPA1           | 326 | GTTGAAACAAGATAAGATCAAATTGACGTCATGGTAA  | AAAATTGACGTCATGGTAA | TTACA | 385   |     |     |  |
| <i>Pan troglodytes</i> GPA1        | 326 | GTTGAAACAAGATAAGATCAAATTGACGTCATGGTAA  | AAAATTGACGTCATGGTAA | TTACA | 385   |     |     |  |
| <i>Pongo abelii</i> GPA1           | 326 | GTTGAAACAAGATAAGATCAAATTGATGTCATGGTAA  | AAAATTGACGTCATGGTAA | TTACA | 385   |     |     |  |
| <i>Nomascus leucogenys</i> GPA1    | 326 | GTTGAAACAAGATAAGATCAAATTGACGTCATGGTAA  | AAAATTGACGTCATGGTAA | TTACA | 385   |     |     |  |
| <i>Callithrix jacchus</i> GPA1     | 329 | ATTGAAACAAGATAAGATCAAATTGATGTCATGGTAA  | -----               | TTACA | 370   |     |     |  |
| <i>Otolemur garnettii</i> GPA1     | 329 | GTTGAAACAAGATAAGATCAAATTGATGTCACAGTAA  | -----               | TTACA | 370   |     |     |  |
| <i>Mus musculus</i> GpA1           | 312 | GTTGCAATGTGATATGATCAA                  | TTGATGTCATGGTAA     | ----- | TTATA | 352 |     |  |
| <i>Rattus norvegicus</i> GpA1      | 311 | GTTGCAATGTGATAAGATCAA                  | CTGATGTCATGGTAA     | ----- | TTATA | 352 |     |  |
| <i>Cavia porcellus</i> GPA1        | 333 | ATTGAAACAAGATAAGATCAAATTGATGTCATGGTAA  | -----               | TTACA | 374   |     |     |  |
| <i>Oryctolagus cuniculus</i> GPA1  | 342 | GTTGAAACAAGATAAATCAAATTGATGTCATAGTAA   | -----               | TTACA | 383   |     |     |  |
| <i>Bos taurus</i> GPA1             | 344 | GCTGAAACAAGATAAGATAAAA                 | TTGATGTCATGGTAA     | ----- | TTATG | 385 |     |  |
| <i>Equus caballus</i> GPA1         | 345 | GTTGAAACAAGATAAGATCAAATTGATGTCATA      | TA                  | ----- | TTACA | 385 |     |  |
| <i>Canis lupus familiaris</i> GPA1 | 341 | GTTGAAACAAGATAAGATCAAATTGATGTCATAGTAA  | -----               | TTACA | 382   |     |     |  |
| <i>Myotis lucifugus</i> GPA1       | 344 | GTTGAAACCAAGATAAGATCAAATTGATGTCATGGTAA | -----               | TTACG | 385   |     |     |  |
| <i>Dasytus novemcinctus</i> GPA1   | 342 | ATCAAGGCAAGATAAGCTCAA                  | CTGATGTCATGGTAA     | ----- | TTATA | 383 |     |  |
| <i>Loxodonta africana</i> GPA1     | 340 | GATGAAACAAGATAAGATCAA                  | CTGATGTCATAGTGA     | ----- | TTACA | 381 |     |  |
| <i>Procavia capensis</i> GPA1      | 340 | CTCAAACCTAGATAAGATCAA                  | ATTGATGTCATGGTGA    | ----- | TTACA | 381 |     |  |

BBBBBBBBBBBBBBBBBBBBCCCCCCCCCCCCCCCC

|                                    |     | 430                 | 440                                            | 450 | 460 | 470 | 480 |  |
|------------------------------------|-----|---------------------|------------------------------------------------|-----|-----|-----|-----|--|
| <i>Homo sapiens</i> GPA1           | 386 | CCAAGTACCCTTCAATCAT | TGGATGGAATTTCTGTTGATCCCAGGGCTTAGATGCAGGT       | 445 |     |     |     |  |
| <i>Pan troglodytes</i> GPA1        | 386 | CCAAGTACCCTTCCATCAT | TGGATGGAATTTCTGTTGATCCCAGGGCTTAGATGCAGGT       | 445 |     |     |     |  |
| <i>Pongo abelii</i> GPA1           | 386 | CCAAGTACCCTTCAATCAT | TGGATGGAATTTCTGTTGATCCCAGGGCTTAGATGCAGGT       | 445 |     |     |     |  |
| <i>Nomascus leucogenys</i> GPA1    | 386 | CCAAGTACCCTTCAATCAT | TGGATGGAATTTCTGTTGATCCCAGGGCTTAGATGCAGGT       | 445 |     |     |     |  |
| <i>Callithrix jacchus</i> GPA1     | 371 | CCAAGTGCCATTCAATCAT | TGGATGGAATTTACTGTTGATCCCAGGGCTTAGATGCAGGT      | 430 |     |     |     |  |
| <i>Otolemur garnettii</i> GPA1     | 371 | CCAAGTACCCTTCAATCAT | TGGATGGAATTTACTGTTGATCCCAGGGCTTAGATGCAGGT      | 430 |     |     |     |  |
| <i>Mus musculus</i> GpA1           | 353 | CCAAGTGCCATCCAATC   | ACTGGCTAGAATTTACCCCTGATCCCAGGGCTTAGATGCAGGT    | 412 |     |     |     |  |
| <i>Rattus norvegicus</i> GpA1      | 353 | CCAAGTACCATCCAATC   | ACCCTGGATGGAATTTACTGTTGATCCCAGGGCTTAGATGCAGGT  | 412 |     |     |     |  |
| <i>Cavia porcellus</i> GPA1        | 375 | GCAAGTACCATTCAATC   | ACTGAGCGAATTTACTGTTGATCCCAGGGCTTAGATGCAGGT     | 434 |     |     |     |  |
| <i>Oryctolagus cuniculus</i> GPA1  | 384 | CCAAGTACCATTCAATC   | AATGGTGGATGGAATTTGATGTTGATCCCAGGGCTTAGATGCAGGT | 443 |     |     |     |  |
| <i>Bos taurus</i> GPA1             | 386 | TGAAGTACCATTCAATC   | ATGGTGGATGGAATTTACTGTTGATCCCAGGGCTTAGATGCAGGT  | 445 |     |     |     |  |
| <i>Equus caballus</i> GPA1         | 386 | TGAAGTACCATTCAATC   | ACTGGATGGAATTTACTGTTGATCCCAGGGCTTAGATGCAGGT    | 445 |     |     |     |  |
| <i>Canis lupus familiaris</i> GPA1 | 383 | TGAAGGACCATTCAATC   | ACTGGATGGAATTTACTGTTGATCCCAGGGCTTAGATGCAGGT    | 442 |     |     |     |  |
| <i>Myotis lucifugus</i> GPA1       | 386 | CGGAGTACCATTCAATC   | ACTGGATGGAATTTACTGTTGATCCCAGGGCTTAGATGCAGGT    | 445 |     |     |     |  |
| <i>Dasytus novemcinctus</i> GPA1   | 384 | CCAAGTGCCATTCAATC   | ATGGATGGAATTTACTGTTGATCCCAGGGCTTAGATGCAGGT     | 443 |     |     |     |  |
| <i>Loxodonta africana</i> GPA1     | 382 | CTAAGTACCATTCAATC   | TTGGCTGGGATTTACTGTTGATCCCAGGGCTTAGATGCAGGT     | 440 |     |     |     |  |
| <i>Procavia capensis</i> GPA1      | 382 | ATAAGTACCATTCAATC   | TTGGCTGGGATTTACTGTTGATCCCAGGGCTTAGATGCAGGT     | 440 |     |     |     |  |

|                                    |     | 490               | 500                        | 510                 | 520                | 530 | 540 |  |
|------------------------------------|-----|-------------------|----------------------------|---------------------|--------------------|-----|-----|--|
| <i>Homo sapiens</i> GPA1           | 446 | GGAAACA-----      | -----                      | CTCTGCTGGTATAAAAAG  | -CAGGTGAGGACTTCATT | 486 |     |  |
| <i>Pan troglodytes</i> GPA1        | 446 | GGAAACA-----      | -----                      | CTCTGCCGGTATAAAAAG  | -CAGGTGAGGACTTCATT | 486 |     |  |
| <i>Pongo abelii</i> GPA1           | 446 | GGAAACA-----      | -----                      | CTCTGCTGGTATAAAAAG  | -CAGGTAAGGACTTCATT | 486 |     |  |
| <i>Nomascus leucogenys</i> GPA1    | 446 | GGAAACA-----      | -----                      | CTCTGCCGGTATAAAAAG  | -CAGGTGAGGACTTCATT | 486 |     |  |
| <i>Callithrix jacchus</i> GPA1     | 431 | GGAAAGCACATAAGCTT | ----ATTACTCTGCTGGTATAAAAAA | ACAGGTGAAAGACTTTATT | 485                |     |     |  |
| <i>Otolemur garnettii</i> GPA1     | 431 | GGGAACATGCAGTTTTT | ----GTTACTTTGCTGGTATAAAAAG | ACAGGTGAAAGACTTTATT | 486                |     |     |  |
| <i>Mus musculus</i> GpA1           | 413 | GGGAACATGCAATTTGT | ----ATTACTCTGCTGGTATAAAAAG | ACAGGTGGGAGACTTTATT | 468                |     |     |  |
| <i>Rattus norvegicus</i> GpA1      | 413 | GGGAACATGCAATTTGT | ----ATTACTCTGCTGGTATAAAAAG | ACAGGTGGGAGACTTTATT | 468                |     |     |  |
| <i>Cavia porcellus</i> GPA1        | 435 | GGGAACATGCAGTTTTT | ----ATTACTCTGCTGGTATAAAAAG | ACAGGTGAGGACTTTATT  | 490                |     |     |  |
| <i>Oryctolagus cuniculus</i> GPA1  | 444 | GGGAACATGCAGTTTGT | ----ATTACTTTGCTGGTATAAAAAG | ACAGGTGAGGACTTTATT  | 499                |     |     |  |
| <i>Bos taurus</i> GPA1             | 446 | GGGAACATGCAGCTTTT | ----ATGACTCTGCTGGTATAAAG   | ACAGGTGAGGACTTTATT  | 501                |     |     |  |
| <i>Equus caballus</i> GPA1         | 446 | GGGAACATGCAGTCTTT | ----ATCACTCTGCTGGTATAAAAAG | ATAGGTGAGGACTTTATT  | 501                |     |     |  |
| <i>Canis lupus familiaris</i> GPA1 | 443 | GGGAACATGCAGTTTTT | ----ATTACTCTGCTGGTATAAAAAG | ACAGGTGAGGACTTTATT  | 498                |     |     |  |
| <i>Myotis lucifugus</i> GPA1       | 446 | GGGAACATGCAGTTTTT | ----ATTTCTCTGCTGGTATAAAAAG | -CAGGTGGGGACTTTTGT  | 500                |     |     |  |
| <i>Dasytus novemcinctus</i> GPA1   | 444 | GGGAACGTGCTGTTTTT | ----ATTACTCTGCTGGTATAAAAAG | ACAGGTGAGGACTTTATT  | 499                |     |     |  |
| <i>Loxodonta africana</i> GPA1     | 441 | GGGAACATGTAGTTTTT | ----ATTACTCGGCTGGTATAAAAAG | ATAGGTGAGGACTTTATT  | 496                |     |     |  |
| <i>Procavia capensis</i> GPA1      | 441 | GGGAATATGTAGTTTTT | TTAAATTA                   | CTTGCTGGTATAAAAAG   | ATAGGTGAGGACTTTATT | 500 |     |  |

DDDD

|                                    | 550 | 560                | 570               | 580             | 590           | 600           |     |
|------------------------------------|-----|--------------------|-------------------|-----------------|---------------|---------------|-----|
| <i>Homo sapiens</i> GPA1           | 487 | -AACTGCAGTTACTGAGA | ACTCATAAGACGAAGCT | AAAAATCCCTCTT   | CGGATCCACAGTC | 545           |     |
| <i>Pan troglodytes</i> GPA1        | 487 | -AACTGCAGTTACTGAGA | ACTCACAAGACGAAGCT | AAAAATCCCTCTT   | CGGATCCACAGTC | 545           |     |
| <i>Pongo abelii</i> GPA1           | 487 | -AACTGCAGTTACTGAGA | ACTCACAAGACGAAGCT | AAAAATCCATCTT   | CGGATCCACAGTC | 545           |     |
| <i>Nomascus leucogenys</i> GPA1    | 487 | -AACTGCAGTTACTGAGA | ACTCACAAGACGAAGCT | AAAAATCCCTCTT   | CGGATCCACAGTC | 545           |     |
| <i>Callithrix jacchus</i> GPA1     | 486 | -AACTGCAGTTACTGAGA | AATCACAAGACGAAGCT | AAAAATCTCTT     | CAGATCCACAGTC | 544           |     |
| <i>Otolemur garnettii</i> GPA1     | 487 | -AACTGTAGTTACTGAG  | CAATCACGGGACGAA   | AAAAATCCCTCTT   | CAGATCTACAATC | 545           |     |
| <i>Mus musculus</i> GpA1           | 469 | -AACTGCAGGCACTGAAA | AATCCAGAGACATTGT  | ----CCCCT---    | CAGATCGACAATC | 520           |     |
| <i>Rattus norvegicus</i> GpA1      | 459 | -AACTGCAGGCACTGAAA | AATC-GGAGACCAAGT  | ----CCCCT---    | CAGATCGACAATC | 509           |     |
| <i>Cavia porcellus</i> GPA1        | 491 | -ATCTGCAGTTCCTGAGA | AATCACAAGAGAAAAT  | TAAA-TTCCTTTT   | CAGATCTACAACT | 548           |     |
| <i>Oryctolagus cuniculus</i> GPA1  | 500 | -AACACAGTTACTGAGA  | AATCACGAGACGAACT  | AAAAATCTCTT     | CAGACCCACAGTC | 558           |     |
| <i>Bos taurus</i> GPA1             | 502 | -AAAAGCAGTTCCTGAGA | AATCACAAGACAAA    | AAAAATCTCTT     | CAGATCCACAGTC | 560           |     |
| <i>Equus caballus</i> GPA1         | 502 | -AACTCAGTTACTGAGA  | AATCACAAGACGAAG   | CTAGAGTCCCTCTT  | CAGAGCCACAGTC | 560           |     |
| <i>Canis lupus familiaris</i> GPA1 | 499 | -AACTGTAGTTACTGAGA | AATCACAAGGAAA     | AGCTAAAAATCCAT  | CTT           | CAGATCCACAATC | 557 |
| <i>Myotis lucifugus</i> GPA1       | 501 | TAACTGCAGTTACTGAGA | AATCACAAGACGAA    | AGCTAAAAATCCCT  | ---           | CAGATCCACAATC | 557 |
| <i>Dasyopus novemcinctus</i> GPA1  | 500 | -AACTGTGGTTACTGAGA | AATCATAAGACGAA    | ACTAAAAACCCCT   | ---           | CAGATTCACAATC | 558 |
| <i>Loxodonta africana</i> GPA1     | 497 | -AATTACAGTTACTGAGA | A-TCACAAGACGAA    | ACTGGAATCCCTCTT | CAGATTCACAAGC | 554           |     |
| <i>Procavia capensis</i> GPA1      | 501 | -AATTACAGTTACTGAGA | A-TCACAAGACGAA    | ACTGGAATCCCTCTT | C-GATTACAGATC | 557           |     |

EEEEEEEEEEEEEEEEEEEEEEEEEEEEEEEEEEEEEEEEEEEEEEEEEEEEEEEE

|                                    | 610 | 620               | 630              | 640              | 650                 | 660        |  |
|------------------------------------|-----|-------------------|------------------|------------------|---------------------|------------|--|
| <i>Homo sapiens</i> GPA1           | 546 | AACCGCCCTGAACACAT | CCTGCAAAAAGC--   | CCAGAGAAAAGGTAAT | TGAA-TGAAA--T       | 600        |  |
| <i>Pan troglodytes</i> GPA1        | 546 | AACCGCCCTGAACACAT | CCTGCAAAAAGC--   | CCAGAGAAAAGGTAAT | TGAA-TGAAA--T       | 600        |  |
| <i>Pongo abelii</i> GPA1           | 546 | AACCGCCCTGAACACAT | CCTGCAAAAAGC--   | CCAGAGAAAAGGTAAT | TGAA-TGAAA--T       | 600        |  |
| <i>Nomascus leucogenys</i> GPA1    | 546 | AACCGCCCTGAACACAT | CCTGCAAAAAGC--   | CCAGAGAAAAGGTAAT | TGAA-TGAAA--T       | 600        |  |
| <i>Callithrix jacchus</i> GPA1     | 545 | AACCGCCCTGAACAT   | TATCCTACAAAAGC-- | CCAGAAAAGGTAACAT | TGAA-TGAAA--T       | 599        |  |
| <i>Otolemur garnettii</i> GPA1     | 546 | AGCTGCCCTGAACACA  | CATAGCAAGAAGC--  | CCAGAGGAAGGTAAT  | TGAA-TGAAA--T       | 600        |  |
| <i>Mus musculus</i> GpA1           | 521 | ACCTGCCAGAACACAT  | CCCTCAAAAAGT--   | CCAGAGGTAGGTAAT  | TGA-TGAAA--T        | 574        |  |
| <i>Rattus norvegicus</i> GpA1      | 510 | AACCGCCAGAACACAT  | CCCTCAAAAAGT--   | CCAGAGGTAGGTAAT  | TGA-TGAAA--T        | 563        |  |
| <i>Cavia porcellus</i> GPA1        | 549 | GACTGCCCTGAACAT   | TATTGTGAGACAGG   | TAAATTTGAAGAAGG  | TAAATTTAAA-TGAAA--T | 605        |  |
| <i>Oryctolagus cuniculus</i> GPA1  | 559 | ATCTGCCCTGGGCAC   | ATCCTGCAAAAAGT-- | TCTGAGAAAAGG     | TAAATTTGAATC--T     | 613        |  |
| <i>Bos taurus</i> GPA1             | 561 | AACCGCCCTGACTAC   | ATTCTGCAAAAAGT-- | CCAGAGGACGGTAA   | AAATGAA-TGAAA--T    | 614        |  |
| <i>Equus caballus</i> GPA1         | 561 | AACGTCTCTGAACAC   | ATCCTACAAAAGT--  | CCAGAGGAAGGTA    | ATGAA-TGAA--C       | 615        |  |
| <i>Canis lupus familiaris</i> GPA1 | 558 | AGCTGCCCTGACAC    | ATCCTGCAAAAAGT-- | CCGAGGAAAGGTA    | ATGAA-TGAA--C       | 612        |  |
| <i>Myotis lucifugus</i> GPA1       | 558 | AACCTACCCGAAAC    | ACATCCCTGCAAAA   | AGT--CCAGAGGA    | AGGTAAGTAAAAGG      | AAAAAA 615 |  |
| <i>Dasyopus novemcinctus</i> GPA1  | 559 | AACGTCTGTGAACAC   | ATCCTGCAAAAAGT-- | CCAGAGGAAGGTA    | ATGAA-TGAA--C       | 612        |  |
| <i>Loxodonta africana</i> GPA1     | 555 | AACCGCCCTGAACAC   | ATCCTGCAAAAAGT-- | CCAGACGAAGGTA    | ATGAA-TGAA--C       | 609        |  |
| <i>Procavia capensis</i> GPA1      | 558 | AACCGCCCTGAACAC   | ATCCTGCAAAAAGT-- | CCAGAGAAAAGGTA   | ATGAAATGAA--C       | 613        |  |

EEEEEEEEEEEEEEEEEEEEEEEEEEEEEEEEEEEEEEEEEEEEEEEEEEEEEEEE

|                                    | 670 | 680              | 690              | 700              | 710                | 720       |  |
|------------------------------------|-----|------------------|------------------|------------------|--------------------|-----------|--|
| <i>Homo sapiens</i> GPA1           | 601 | AATTTTGGGGGACTTT | AATTGAG----GAGT  | AAAAATATTTGAGA   | AATATGAGGAAG       | ATTCC 656 |  |
| <i>Pan troglodytes</i> GPA1        | 601 | AATTTTGGGGGACTTT | AATTGAG----GAGT  | AAAAATATTTGAGA   | AATATGAGGAAG       | ATTCC 656 |  |
| <i>Pongo abelii</i> GPA1           | 601 | AATTTTGGGGGACTTT | AATTGAG----GAGT  | AAAAATATTTGAGA   | AATATGAGGAAG       | ATTCC 656 |  |
| <i>Nomascus leucogenys</i> GPA1    | 601 | AATTTTGGGGGACTTT | AATTGAG----GAGT  | AAAAATATTTGAGA   | AATATGAGGAAG       | ATTCC 656 |  |
| <i>Callithrix jacchus</i> GPA1     | 600 | AATTTTGGGGGACTTT | AATTGAG----GAGT  | AAAAATATTTGAGAAA | ATA---AAGATTTC     | 652       |  |
| <i>Otolemur garnettii</i> GPA1     | 601 | AATGGGGGATGGGGG  | TGTTAATTGCCAGCT  | GAAATATTTGAGAA   | CATAGGAAAGCTTCC    | 660       |  |
| <i>Mus musculus</i> GpA1           | 575 | CATTT-GGGGGATTT  | AATTAAAG----GAGT | AAAAATATTTGTGAC  | CAAGGAAGCAAT--     | 627       |  |
| <i>Rattus norvegicus</i> GpA1      | 564 | CATTT-GGGGGATTT  | AATTAAAG----GAGT | CAAACTTCCGACCC   | CAGGAAGCAAT--      | 616       |  |
| <i>Cavia porcellus</i> GPA1        | 606 | AATTTTGGGGGATTT  | AATTGAG----GAGT  | -----ATTTAAGA    | ATATAGAGGAACTTTC   | 656       |  |
| <i>Oryctolagus cuniculus</i> GPA1  | 614 | AATTT-GGGGGATTT  | AATTGAG----GGT   | AAAAATATTTGAGC   | TATCAGGGGACTTTC    | 668       |  |
| <i>Bos taurus</i> GPA1             | 615 | AATTT-GGGGGATTT  | AATTGAG----GGT   | AAAAATATTTGAGG   | ATACAAGGGAGCT--    | 666       |  |
| <i>Equus caballus</i> GPA1         | 616 | AATTT-TGGGATTT   | AATTGAGTGGT      | CAGTGAATATTTG    | AGATATAGGGGAG----  | 669       |  |
| <i>Canis lupus familiaris</i> GPA1 | 613 | AATTTTGTGGGATTT  | AATTGAGTGGT      | GAATATTTTATA     | ATATAGGTCAG----    | 667       |  |
| <i>Myotis lucifugus</i> GPA1       | 616 | AAAAATGGGGGATTT  | AATTGAGTGGGACT   | AAAAATATTTGAG    | AATGTAGGGGAG----   | 670       |  |
| <i>Dasyopus novemcinctus</i> GPA1  | 613 | AATAT-GGGGGATTT  | AATTGAGTGGGACT   | AAAAATAC-TGAAA   | ATAATAGGGGAGATTTC  | 669       |  |
| <i>Loxodonta africana</i> GPA1     | 610 | AATTTT-TGACATTT  | AATTGAGCAAGGAA   | TGACACATTTGA     | ACCTATAGGAGACTTTC  | 668       |  |
| <i>Procavia capensis</i> GPA1      | 614 | AATTTT-TGACATTT  | AATTGAGTAATGA    | TGACACATTTA      | AGCATAAGGAAAGCTTTC | 672       |  |

|                                    |     | 730                         | 740                           | 750                       | 760 | 770 | 780 |  |
|------------------------------------|-----|-----------------------------|-------------------------------|---------------------------|-----|-----|-----|--|
| <i>Homo sapiens</i> GPA1           | 657 | AAAGTCTCTGCATATACCTTAATAAGA | ACTGAG                        | ----ACAGGCTTTTACTCATTCTC  | TT  | 711 |     |  |
| <i>Pan troglodytes</i> GPA1        | 657 | AAAGTCTCTGCGTATACCTTAATAAGA | ACAGAG                        | ----ACAGGCTTTTACTCATTCTC  | TT  | 711 |     |  |
| <i>Pongo abelii</i> GPA1           | 657 | AAAGTCTCTGCATATACCTTAATAAGA | ACAGAG                        | ----ACAGGCTTTTACTCATTCTC  | TT  | 711 |     |  |
| <i>Nomascus leucogenys</i> GPA1    | 657 | AGAGTCTCTGCATATACCTTATTAAGA | ACAGAG                        | ----ACAGGCTTTTACTCATTCTC  | TT  | 711 |     |  |
| <i>Callithrix jacchus</i> GPA1     | 653 | AGAATCTCTGCATACATGTTAGTAAGA | AAGAGAG                       | -----AAGCTTTTACTCATTCTC   | TT  | 705 |     |  |
| <i>Otolemur garnettii</i> GPA1     | 661 | AGAGTTTATGCATAAACCTTGGTAAGA | AGACAGTTAGACAAG               | -ATCTCCCAATTCAT           | TT  | 718 |     |  |
| <i>Mus musculus</i> GpA1           | 628 | ----TTTCTGCATAAATGTTGGTAG   | GAAAATAATT                    | ----AGGCATTCATTAATTTTC    | TT  | 678 |     |  |
| <i>Rattus norvegicus</i> GpA1      | 617 | ----TTTCTGCATCTATCTTGGTAAGA | AAAATAATT                     | ----AGGCATTTGGTTGATTTTC   | TT  | 667 |     |  |
| <i>Cavia porcellus</i> GPA1        | 657 | AGAGTTGATGCTTAAAGCTTAGTGAGA | AGAAATTAGACAGGCATTTACTCATTCTC | TT                        | 715 |     |     |  |
| <i>Oryctolagus cuniculus</i> GPA1  | 669 | AGAGTCTGTGCACAAACCTTAGTAAGA | AGAGTTAGATAGCCATTTACTCATTCTC  | TT                        | 727 |     |     |  |
| <i>Bos taurus</i> GPA1             | 667 | ---GGTTGTGCATAAACCTTAGTAAGA | AAGAGAG                       | ----ACAGGCATTTATGCATTCTC  | CT  | 718 |     |  |
| <i>Equus caballus</i> GPA1         | 670 | -----CTGTGCATAAACCTTAGTAAGA | AAGAAAG                       | ----ACAGGCATTTACACATTCTC  | TT  | 719 |     |  |
| <i>Canis lupus familiaris</i> GPA1 | 668 | -----CTATGCATAAGCCTTAGTGAG  | GAGAG                         | ----ACAGCATTTACACATTCTC   | TT  | 717 |     |  |
| <i>Myotis lucifugus</i> GPA1       | 671 | -----CTGTGCATAAACCTTAGTAAA  | AAAGGGGG                      | ----AGAGCGTTGACACATTTCTC  | TT  | 720 |     |  |
| <i>Dasyopus novemcinctus</i> GPA1  | 670 | AGAGTCTATGCTAATGACTTTAATAAG | ATGAGAC                       | ---AGGAGGTATTTGCTCACTTTTC | TT  | 728 |     |  |
| <i>Loxodonta africana</i> GPA1     | 669 | AGAGTCTATGCTAATGACTTTAATAAG | ATGAGAC                       | ---AGGAGGTATTTGCTCACTTTTC | TT  | 724 |     |  |
| <i>Procavia capensis</i> GPA1      | 673 | AGCGTCCACATAACAACCTTGGTAAG  | ATGAGAG                       | ---AGGAGGTATTTGCTCACTTTTC | TT  | 727 |     |  |

|                                    |     | 790                         | 800                       | 810      | 820       | 830       | 840 |  |
|------------------------------------|-----|-----------------------------|---------------------------|----------|-----------|-----------|-----|--|
| <i>Homo sapiens</i> GPA1           | 712 | TTCAGCACTTATGATTTGAATTAGAAG | GGAAGTCTCTAAAA            | ---TTTGG | CT---     | GTGATCATA | 766 |  |
| <i>Pan troglodytes</i> GPA1        | 712 | TTCAGCACTTATGATTTGAATTAGAAG | GGAAGTCTCTAAAA            | ---TTTGG | CT---     | GTGATCATA | 766 |  |
| <i>Pongo abelii</i> GPA1           | 712 | TTCAGCACTTATGATTTGAATTAGAAG | GGAAGTCTCTAAAA            | ---TTTGG | CT---     | GTGATCATA | 766 |  |
| <i>Nomascus leucogenys</i> GPA1    | 712 | TTCAGCACTTATGATTTGAATTAGAAG | GGAAGTCTCTACAA            | ---TTTGG | CT---     | GTGATCATA | 766 |  |
| <i>Callithrix jacchus</i> GPA1     | 706 | TTCAGCACTCATGAGTTGAATTTGGAG | GGAAGTCTCTAAAACTGTGG      | CT---    | GTGATCATA | 761       |     |  |
| <i>Otolemur garnettii</i> GPA1     | 719 | TT-AGTACTCATGATTTGAATTTGGAG | GGAAGTCTCTAAAACTGTGGTCT   | ---      | GCAATCACA | 774       |     |  |
| <i>Mus musculus</i> GpA1           | 679 | TATGGTGTCTATGCTGAGTTGGAGGG  | AGGCTCTAAGACTGTAAGCTAAGG  | CAATCGTA | 738       |           |     |  |
| <i>Rattus norvegicus</i> GpA1      | 668 | TATGGTGTCTATGACTGAGTTGGAGG  | AGGCTCTCTCAA              | ---TGT   | -----     | 709       |     |  |
| <i>Cavia porcellus</i> GPA1        | 716 | TTTATCACTCATGACTAAATTTGGAG  | GGAAGTCT-CAAAATTTGTGGTCT  | -----    | 762       |           |     |  |
| <i>Oryctolagus cuniculus</i> GPA1  | 728 | GTCAGCACTTACGATTTGAATTTGGAG | GGAAGTCTCTAAAACTGTGGTCT   | ---      | GTGCTCATG | 784       |     |  |
| <i>Bos taurus</i> GPA1             | 719 | TTCAGCACTCATGATTTGAATTTGGAG | GGAAGTCTCTAAAACTGTGGTCT   | ---      | GTGATCACA | 775       |     |  |
| <i>Equus caballus</i> GPA1         | 720 | TTCAGCACTCATGATTTGAATTTGGAG | GGAAGTCTCTCAAAATTTGTGGTCT | ---      | GTGATCACA | 776       |     |  |
| <i>Canis lupus familiaris</i> GPA1 | 718 | TTCAGCACTCATGATTTGAATTTGGAG | GGAAGTCTCTAAAACTGTGGTCT   | ----     | GATCACA   | 772       |     |  |
| <i>Myotis lucifugus</i> GPA1       | 721 | TCCAGCACTCATGATTTGAATTTGGAG | GGAAGTCTCTAATATTGTGGTCT   | ---      | ATGATCACA | 777       |     |  |
| <i>Dasyopus novemcinctus</i> GPA1  | 729 | TTCAGCACTCATGATTTGAATTTGGAG | GGAAGTCTCTAAAACTGTGGTCT   | ---      | GAGATCACA | 785       |     |  |
| <i>Loxodonta africana</i> GPA1     | 725 | T-CAGCGCTCACGATTAAGTTAGGAG  | GGAAGTCTCTAAAAATTTGTGGTCT | ---      | GCGATCACA | 780       |     |  |
| <i>Procavia capensis</i> GPA1      | 728 | TTCAGCACTCATTAATTTAAACTTTGG | GGAAGTCTCTAAAACTGTGGCT    | ---      | GTGATCACA | 784       |     |  |

|                                    |     | 850                         | 860                        | 870         | 880 | 890 | 900 |  |
|------------------------------------|-----|-----------------------------|----------------------------|-------------|-----|-----|-----|--|
| <i>Homo sapiens</i> GPA1           | 767 | GGGTAAGATGTTATCTAACAGAAAGCC | CAGAAACCCAAATGTCTCCTGCTGAG | ATGCTT      | 826 |     |     |  |
| <i>Pan troglodytes</i> GPA1        | 767 | GGGTAAGATGTTATCTAACAGAAAGCC | CAGAAACCCAAATGTCTCCTGCTGAG | ATGCTT      | 826 |     |     |  |
| <i>Pongo abelii</i> GPA1           | 767 | GGGTAAGATGTTATCTAACAGAAAGCC | CAGAAACCCAAATGTCTCCTGCTGAG | ATGCTT      | 826 |     |     |  |
| <i>Nomascus leucogenys</i> GPA1    | 767 | GGGTAAGATGTTATCTAACAGAAAGCC | CAGAAACCCAAATGTCTCCTGCTGAG | ATGCTT      | 826 |     |     |  |
| <i>Callithrix jacchus</i> GPA1     | 762 | GGCTAGGATGTTATCTA---GAAGCC  | AGCAACCCAAATGTCTCCTGCTGAG  | ATGCTT      | 818 |     |     |  |
| <i>Otolemur garnettii</i> GPA1     | 775 | GGCTCAGATGTCATCTAACAAATCC   | AGAAATAAATGTCTCCTGCTAAGAT  | GCTGTAGT    | 834 |     |     |  |
| <i>Mus musculus</i> GpA1           | 739 | AGCTAAGATGTTATCTGGAAGAGCC   | AGGATACAAGTATCTCCTGCTGAG   | CTGCTGAA    | 798 |     |     |  |
| <i>Rattus norvegicus</i> GpA1      | 710 | AGCTAAGGTTGTTTCTAACAGAAAGCC | AGGATACAAGTATCTCCTGCTGAG   | CTGCTGAA    | 754 |     |     |  |
| <i>Cavia porcellus</i> GPA1        | 763 | -----GATCTAACAAAGCC         | CAGAAATCAAATGTCTCCTGCTGAT  | TACTGGAG    | 810 |     |     |  |
| <i>Oryctolagus cuniculus</i> GPA1  | 785 | GGCTAAGATGTTATCTAACAGAAAGCC | CAGAAACCCAAATGTCTCCTGCC    | GAGATGCC    | 844 |     |     |  |
| <i>Bos taurus</i> GPA1             | 776 | GGCTAAGATGTTATCTAACATGAAGCC | CAGAAACCAAATGTCTCCTGCTGT   | GATGCTGAGT  | 835 |     |     |  |
| <i>Equus caballus</i> GPA1         | 777 | GGCTAAGATGTTATCTAACAGAAAGCC | CAGAAACCAAATGTCTCCTGCTGAG  | ATGCCGTGAGT | 836 |     |     |  |
| <i>Canis lupus familiaris</i> GPA1 | 773 | GGCTAAGATGTTATCTAACAGAAA    | CCAGAAACCAAATGTCTCCTGCTGAG | ATGTGCAAGT  | 832 |     |     |  |
| <i>Myotis lucifugus</i> GPA1       | 778 | GGCTAAGATGTTATCTAACAGAAAGCC | CAGAAACCAAATGTCTCCTGCTGAG  | ATGTGCTGAGT | 837 |     |     |  |
| <i>Dasyopus novemcinctus</i> GPA1  | 786 | GGCTAAGATGTTATCTAACAGAAAGCC | CAGAAACCAAATGTCTCCTGCTGAG  | ATGCCGTGAGT | 845 |     |     |  |
| <i>Loxodonta africana</i> GPA1     | 781 | AGCTAAGATATTATCTAGCAGAAAGCC | CAGAAACCAAATTT---CTACTAG   | GATGCTTGAAT | 837 |     |     |  |
| <i>Procavia capensis</i> GPA1      | 785 | GGCTAAGATATTATCTAACAGAAAGCC | CAGAAAGCAGATTT---CTGCTGAC  | ATGCTTGAAT  | 841 |     |     |  |

|                                    |     | 910   | 920         | 930                 | 940            | 950             | 960        |     |
|------------------------------------|-----|-------|-------------|---------------------|----------------|-----------------|------------|-----|
| <i>Homo sapiens</i> GPA1           | 827 | GCCTG | -----       | TCAGGATCTAAAAAATTTT | CCTCAAGAATTACT | GTATGTCATTGGA   |            | 876 |
| <i>Pan troglodytes</i> GPA1        | 827 | GCCTG | -----       | TCAGGATCTAAAAAATTTT | CCTCAAGAATTAT  | GTATGTCATTGGA   |            | 876 |
| <i>Pongo abelii</i> GPA1           | 827 | GCCTG | -----       | TCAGGATCTAAAAAATTTT | CCTCAAGAATTAT  | GTATGTCATTGGA   |            | 876 |
| <i>Nomascus leucogenys</i> GPA1    | 827 | GCCTG | -----       | TCAGGATCTAAAAAATTTT | CCTCAGGAATTAT  | GTATGTCATTGGA   |            | 876 |
| <i>Callithrix jacchus</i> GPA1     | 819 | GCCTG | -----       | TCAGCATCAAAAAAATTTT | CCTCAAGAATTAT  | GGATGCCATTGGA   |            | 868 |
| <i>Otolemur garnettii</i> GPA1     | 835 | GCCTG | -----       | TCAGTATTTACAA-TTTT  | CCTCAAGAATTACT | TATATGTCATATAT  |            | 883 |
| <i>Mus musculus</i> GpA1           | 799 | GCCT  | AAAATCTAAAA | TCAAAACTAAAAATTTT   | CTCAAGAACCATT  | GCACGTCATTGGA   |            | 858 |
| <i>Rattus norvegicus</i> GpA1      | 755 | ----- | -----       | TCAAAACTAAAAATTTT   | CTCAAGAACCA    | -----TTTGA      |            | 789 |
| <i>Cavia porcellus</i> GPA1        | 811 | ACTTG | -----       | TCAATATCTACAAATCTT  | GTCAAAAA       | -----GGATGTCATT | TGA        | 855 |
| <i>Oryctolagus cuniculus</i> GPA1  | 845 | GCCTG | -----       | TCAGTAGCTAAAAAATTTT | CCTCAAGAATTAT  | GGATGTCATTTGA   |            | 894 |
| <i>Bos taurus</i> GPA1             | 836 | GCCTG | -----       | TCAGTAACTAAAAAATTTT | CTCAAGAGATAT   | GGATGTCATTTGA   |            | 885 |
| <i>Equus caballus</i> GPA1         | 837 | GCCTG | -----       | TCAGTATCTAAAAAATTTT | CCTTAGGAAATAT  | GGATGTCATTTGA   |            | 886 |
| <i>Canis lupus familiaris</i> GPA1 | 833 | GCCTG | -----       | TCAGTATCTAAACATTTT  | CCTCAAGAAATAT  | GGGTATCATTTGA   |            | 882 |
| <i>Myotis lucifugus</i> GPA1       | 838 | GCCCG | -----       | TCAGTATCTAAAAAATTTT | CTCACGAAATAT   | GGGATGTCATTGGA  | -GTCATTTGA | 886 |
| <i>Dasyurus novemcinctus</i> GPA1  | 846 | GCCTG | -----       | TCAGTATCTAAAAAATTTT | CTCAA-AAATAT   | GGGTGTTATTTGA   |            | 894 |
| <i>Loxodonta africana</i> GPA1     | 838 | GCTTG | -----       | TCAGTATCTAAAAAATTTT | CCTTAAGAATTAT  | TAGATGTCATTTGA  |            | 887 |
| <i>Procavia capensis</i> GPA1      | 842 | ACTTG | -----       | TTAGTACTAAAAAA-TTC  | CATAAGAATTAT   | TAGATATCATTTGA  |            | 890 |

|                                    |     | 970        | 980               |                 |
|------------------------------------|-----|------------|-------------------|-----------------|
| <i>Homo sapiens</i> GPA1           | 877 | AAGACGTTT  | -----TTTTGAGTGGCT | 897 (-6500 bp)  |
| <i>Pan troglodytes</i> GPA1        | 877 | AAGACATTC  | -----TTTTGAGTGGCT | 897 (-6521 bp)  |
| <i>Pongo abelii</i> GPA1           | 877 | AAGACATTC  | -----TTTTGAGTGGCT | 897 (-7878 bp)  |
| <i>Nomascus leucogenys</i> GPA1    | 877 | AAGACATTC  | -----TTTTGAGTGGCT | 897 (-7110 bp)  |
| <i>Callithrix jacchus</i> GPA1     | 869 | AAGGCATTC  | -----TTTTGAGTGGCT | 889 (-13370 bp) |
| <i>Otolemur garnettii</i> GPA1     | 884 | AAGGCATTT  | -----TTTTTAGAAACT | 904 (-9528 bp)  |
| <i>Mus musculus</i> GpA1           | 859 | AGGGCCTTCA | TTTTGAGTATCT      | 880 (-9821 bp)  |
| <i>Rattus norvegicus</i> GpA1      | 790 | AGGGCCTTCA | TTTTGCTCATCT      | 811 (-9008 bp)  |
| <i>Cavia porcellus</i> GPA1        | 856 | AAGGCATTA  | TTTTGAGCGGCT      | 876 (-13271 bp) |
| <i>Oryctolagus cuniculus</i> GPA1  | 895 | AAGGCATTC  | TTTTGAGTGGCT      | 915 (-17837 bp) |
| <i>Bos taurus</i> GPA1             | 886 | AAGGCATCC  | -----GTTTCAGTGGCT | 906 (-13904 bp) |
| <i>Equus caballus</i> GPA1         | 887 | AAGGCATTC  | TTTTGAGTGACT      | 907 (-10508 bp) |
| <i>Canis lupus familiaris</i> GPA1 | 883 | AAGACATTT  | -----GTTTGTAGTACT | 903 (-15867 bp) |
| <i>Myotis lucifugus</i> GPA1       | 887 | AAGGCATTC  | -----TTCTGAGTGGCT | 907 (-7396 bp)  |
| <i>Dasyurus novemcinctus</i> GPA1  | 895 | AACATATTC  | -----TTTTGAATGGCT | 915 (-14762 bp) |
| <i>Loxodonta africana</i> GPA1     | 888 | AAGGCATTC  | -----TTCCGAGTGGCT | 908 (-8983 bp)  |
| <i>Procavia capensis</i> GPA1      | 891 | AAGGCATTC  | -----TTCTAAGTGGCT | 911 (-10795 bp) |
