# Supplementary material for: Initial description of primate-specific cystine-knot Prometheus genes and differential gene expansions of D-dopachrome tautomerase genes
Source: PubMed Central journal article supplement — Meta Gene. 2015 Apr 25;4:118–28. doi: 10.1016/j.mgene.2015.02.005 (PMC4412970; doi:10.1016/j.mgene.2015.02.005), 2015-04-25
Supplement: mmc8.pdf [file mmc8.pdf]

**Supplementary data file 5:** Pairwise nucleotide sequence identities of eutherian adenohipophys cystine-knot genes, and D-dopachrome tautomerase and macrophage migration inhibitory factor genes.

|            | $\bar{a}$    | $a_{\max}$   | $a_{\min}$   | $\bar{a}_{\text{ad}}$ | $\bar{a}$    | $a_{\max}$   | $a_{\min}$   | $\bar{a}_{\text{ad}}$ | $\bar{a}$    | $a_{\max}$ | $a_{\min}$   | $\bar{a}_{\text{ad}}$ |
|------------|--------------|--------------|--------------|-----------------------|--------------|--------------|--------------|-----------------------|--------------|------------|--------------|-----------------------|
| Cluster    | <b>1</b>     |              |              |                       | <b>2</b>     |              |              |                       |              |            |              |                       |
| <b>1</b>   | <b>0,94</b>  | <b>0,997</b> | <b>0,89</b>  | <b>0,018</b>          |              |              |              |                       |              |            |              |                       |
| <b>2</b>   | 0,178        | 0,197        | 0,159        | 0,006                 | <b>0,883</b> | <b>0,997</b> | <b>0,814</b> | <b>0,029</b>          |              |            |              |                       |
| <b>3</b>   | 0,149        | 0,161        | 0,128        | 0,005                 | 0,335        | 0,359        | 0,303        | 0,008                 |              |            |              |                       |
| <b>4</b>   | 0,155        | 0,173        | 0,14         | 0,005                 | 0,361        | 0,387        | 0,331        | 0,008                 |              |            |              |                       |
| <b>5</b>   | 0,135        | 0,156        | 0,116        | 0,009                 | 0,326        | 0,384        | 0,285        | 0,028                 |              |            |              |                       |
| <b>6</b>   | 0,139        | 0,152        | 0,125        | 0,005                 | 0,214        | 0,243        | 0,186        | 0,01                  |              |            |              |                       |
| <b>7</b>   | 0,127        | 0,141        | 0,113        | 0,005                 | 0,237        | 0,281        | 0,194        | 0,009                 |              |            |              |                       |
| Cluster    | <b>3</b>     |              |              |                       | <b>4</b>     |              |              |                       | <b>5</b>     |            |              |                       |
| <b>3</b>   | <b>0,877</b> | <b>0,997</b> | <b>0,784</b> | <b>0,031</b>          |              |              |              |                       |              |            |              |                       |
| <b>4</b>   | 0,431        | 0,458        | 0,397        | 0,008                 | <b>0,869</b> | <b>0,984</b> | <b>0,779</b> | <b>0,032</b>          |              |            |              |                       |
| <b>5</b>   | 0,332        | 0,387        | 0,293        | 0,02                  | 0,364        | 0,423        | 0,318        | 0,026                 | <b>0,782</b> | <b>1</b>   | <b>0,608</b> | <b>0,112</b>          |
| <b>6</b>   | 0,152        | 0,18         | 0,132        | 0,007                 | 0,179        | 0,203        | 0,163        | 0,006                 | 0,168        | 0,2        | 0,145        | 0,011                 |
| <b>7</b>   | 0,176        | 0,191        | 0,147        | 0,007                 | 0,21         | 0,241        | 0,188        | 0,006                 | 0,223        | 0,268      | 0,194        | 0,012                 |
| Cluster    | <b>6</b>     |              |              |                       | <b>7</b>     |              |              |                       |              |            |              |                       |
| <b>6</b>   | <b>0,873</b> | <b>0,944</b> | <b>0,804</b> | <b>0,031</b>          |              |              |              |                       |              |            |              |                       |
| <b>7</b>   | 0,297        | 0,324        | 0,277        | 0,007                 | <b>0,867</b> | <b>1</b>     | <b>0,742</b> | <b>0,044</b>          |              |            |              |                       |
| Cluster    | <b>DDT</b>   |              |              |                       | <b>MIF</b>   |              |              |                       |              |            |              |                       |
| <b>DDT</b> | <b>0,751</b> | <b>1</b>     | <b>0,568</b> | <b>0,087</b>          |              |              |              |                       |              |            |              |                       |
| <b>MIF</b> | 0,445        | 0,494        | 0,36         | 0,03                  | <b>0,908</b> | <b>0,994</b> | <b>0,856</b> | <b>0,02</b>           |              |            |              |                       |

$\bar{a}$ , average pairwise identity;  $\bar{a}_{\text{ad}}$ , average absolute deviation for  $\bar{a}$ ;  $a_{\max}$ , largest pairwise identity;  $a_{\min}$ , smallest pairwise identity; bold, calculation within major gene cluster.
