# Supplementary material for: Initial description of primate-specific cystine-knot Prometheus genes and differential gene expansions of D-dopachrome tautomerase genes
Source: PubMed Central journal article supplement — Meta Gene. 2015 Apr 25;4:118–28. doi: 10.1016/j.mgene.2015.02.005 (PMC4412970; doi:10.1016/j.mgene.2015.02.005), 2015-04-25
Supplement: mmc9.pdf [file mmc9.pdf]

|                                  |    |       |           |                  |      |    |
|----------------------------------|----|-------|-----------|------------------|------|----|
|                                  | 10 | 20    | 30        | 40               | 50   |    |
| <i>Homo sapiens</i> PREA1        | 1  | ----- | MRCVTRTRN | NWRRRAARMPRAGSSA | ---- | 24 |
| <i>Homo sapiens</i> PREA2        | 1  | ----- | MRCVTRTRN | NWRRRAARMPRAGSSA | ---- | 24 |
| <i>Homo sapiens</i> PREA3        | 1  | ----- | MRCVTRTRN | NWRRRAARMPRAGSSA | ---- | 24 |
| <i>Pan troglodytes</i> PREA1     | 1  | ----- | MRCVTRTRN | NWRRRAARMPRAGSSA | ---- | 24 |
| <i>Pongo abelii</i> PREA1        | 1  | ----- | MRCVTRTRN | NWRRRATRMPRAGSSA | ---- | 24 |
| <i>Nomascus leucogenys</i> PREA1 | 1  | ----- | MRCVTRTRN | NWRRRATRMPRAGSSA | ---- | 24 |
| <i>Homo sapiens</i> PREB         | 1  | ----- | MRCVTRTRH | WRRRAARMPRAGSSA  | ---- | 24 |
| <i>Pan troglodytes</i> PREB      | 1  | ----- | MRCVTRTRH | WRRRAARMPRAGSSA  | ---- | 24 |
| <i>Pongo abelii</i> PREB         | 1  | ----- | MRYVTRTRH | WRTAARMLRAGSSA   | ---- | 24 |
| <i>Macaca mulatta</i> PREB       | 1  | ----- | MRCVTRTRN | NWRRRAARMPRAGSSA | ---- | 24 |
| <i>Papio hamadryas</i> PREB      | 1  | ----- | MRCVTRTRN | NWRRRAARMPRACSSA | ---- | 24 |

|                                    |   |                                                                                                |    |
|------------------------------------|---|------------------------------------------------------------------------------------------------|----|
| <i>Homo sapiens</i> FSHB           | 1 | <b>M</b> KTL <b>Q</b> - <b>F</b> FFLFCC- <b>W</b> KAI <b>C</b> - <b>C</b> ----- <b>NS</b> ---- | 20 |
| <i>Homo sapiens</i> GPB5           | 1 | MKLA--FLFLGPMALL--LLAGYGCVLG-----A--SSGNLR                                                     | 31 |
| <i>Pan troglodytes</i> GPB5        | 1 | MKLA--FLFLGPMALL--LLAGYGCVLG-----A--SSGNLR                                                     | 31 |
| <i>Pongo abelii</i> GPB5           | 1 | MKLA--FLFLGPMALL--LLAGYGCVLG-----A--SSGNLR                                                     | 31 |
| <i>Macaca mulatta</i> GPB5         | 1 | MKLA--FLFLGPMALL--LLVGCVCVLG-----T--SSGNLR                                                     | 31 |
| <i>Papio hamadryas</i> GPB5        | 1 | MKLV--YLVLGAVALL--LLGGCVCVLG-----T--SSGNLR                                                     | 31 |
| <i>Callithrix jacchus</i> GPB5     | 1 | MKLA--ILFLGPMALL--LLAGCVCVLG-----A--SSGNLH                                                     | 31 |
| <i>Microcebus murinus</i> GPB5     | 1 | MKLA--HLFLGPAALL--LLAGGARVLG-----T--SGGDLR                                                     | 32 |
| <i>Tupaia belangeri</i> GPB5       | 1 | MKLA--YLVFLGPMALL--LLAGCSCVLS-----T--SSENLR                                                    | 31 |
| <i>Mus musculus</i> GpB5           | 1 | MKLV--YLVLGAVALL--LLGGPDSVLS-----S--SSGNLH                                                     | 31 |
| <i>Rattus norvegicus</i> GpB5      | 1 | MKLV--YLVLGTAAL--LLGSDSVLS-----S--SSGNLH                                                       | 30 |
| <i>Dipodomys ordii</i> GPB5        | 1 | MKLT--CLVLSGSGALL--VLCVCGSVLS-----T--SSENLR                                                    | 31 |
| <i>Cavia porcellus</i> GPB5        | 1 | MKPV--SLFLGALALL--FLDGYGSVLG-----A--SSDELH                                                     | 31 |
| <i>Oryctolagus cuniculus</i> GPB5  | 1 | MKLA--FLFLGPMVLL--LLAGCVCVLS-----S--SSNLR                                                      | 31 |
| <i>Ochotona princeps</i> GPB5      | 1 | MKQP--SLVLPMPVLL--LLADCGCAL--L--SNGNLR                                                         | 31 |
| <i>Tursiops truncatus</i> GPB5     | 1 | MRLA--YLVFLGPAALL--LLAGCVCVLS-----T--SGGNLH                                                    | 31 |
| <i>Bos taurus</i> GPB5             | 1 | MRLV--YLVFLGPMVLL--LLAGCVCVLS-----T--SSENLR                                                    | 31 |
| <i>Equus caballus</i> GPB5         | 1 | MKLA--YLVFLGPMALL--LLAGCVCVLG-----T--YSGDLR                                                    | 31 |
| <i>Canis lupus familiaris</i> GPB5 | 1 | MKLA--YLVFLGPMVLL--LLAGCVCVLS-----T--SSGNLH                                                    | 31 |
| <i>Myotis lucifugus</i> GPB5       | 1 | MKLA--YLVFLGPMALL--LLAGCVCVLS-----T--SSGNLR                                                    | 31 |
| <i>Erinaceus europaeus</i> GPB5    | 1 | MKLV--YLVFLGPMALL--LLAGCVCVLS-----N--ASRDLH                                                    | 31 |
| <i>Dasyurus novemcinctus</i> GPB5  | 1 | MKTA--YLVFVGPVALL--LLAGCVCVLS-----T--SSGDLH                                                    | 31 |
| <i>Echinops telfairi</i> GPB5      | 1 | MKAA--YLVFLGPAVALL--LLAGCGVSS-----T--SSRDLH                                                    | 31 |
| <i>Loxodonta africana</i> GPB5     | 1 | MRPA--YLVFLGPMALL--LLVGCSCVLS-----T--SNESLH                                                    | 31 |
| <i>Homo sapiens</i> TSHB           | 1 | MTAL--FLMSMLF---GLA-CG-----QA-M                                                                | 19 |
| <i>Macaca mulatta</i> TSHB         | 1 | MTAV--FLMSVLF---GLA-CG-----QA-M                                                                | 19 |
| <i>Papio hamadryas</i> TSHB        | 1 | MTAV--FLMSMLF---GLA-CG-----QA-M                                                                | 19 |
| <i>Tarsius syrichta</i> TSHB       | 1 | MTAI--FLMSMLF---GLT-CG-----QA-M                                                                | 19 |
| <i>Otolemur garnettii</i> TSHB     | 1 | MTAT--FLKAMLF---GLA-YG-----QA-M                                                                | 19 |
| <i>Tupaia belangeri</i> TSHB       | 1 | MTAI--FLISMLF---GLA-YG-----QA-M                                                                | 19 |
| <i>Mus musculus</i> TshB           | 1 | MSAA--VLLSVLF---ALA-CG-----QA-A                                                                | 19 |
| <i>Rattus norvegicus</i> TshB      | 1 | MNAV--VLFVSVLF---ALA-CG-----QV-S                                                               | 19 |
| <i>Cavia porcellus</i> TSHB        | 1 | MPAI--FLMSLLF---GLA-CG-----QA-I                                                                | 19 |
| <i>Oryctolagus cuniculus</i> TSHB  | 1 | MTAI--FLMSILF---GLA-CG-----QT-M                                                                | 19 |
| <i>Tursiops truncatus</i> TSHB     | 1 | MTAI--FLMSMLF---GLA-CG-----QA-M                                                                | 19 |
| <i>Bos taurus</i> TSHB             | 1 | MTAT--FLMSMLF---GLA-CG-----QA-M                                                                | 19 |
| <i>Vicugna pacos</i> TSHB          | 1 | MTAI--FLMSVLF---GLA-CG-----QA-M                                                                | 19 |
| <i>Equus caballus</i> TSHB         | 1 | MTAI--FLMSMVF---GLA-CG-----QT-M                                                                | 19 |
| <i>Canis lupus familiaris</i> TSHB | 1 | MTAI--YLMMSLF---GLA-CG-----QA-M                                                                | 19 |
| <i>Myotis lucifugus</i> TSHB       | 1 | MTAI--FLISMLF---GLL-CG-----QA-T                                                                | 19 |
| <i>Dasyurus novemcinctus</i> TSHB  | 1 | MSAI--FLVSMLL---GLA-CG-----QA-M                                                                | 19 |
| <i>Echinops telfairi</i> TSHB      | 1 | MTAI--FLMSMVL---GLV-CG-----QA-V                                                                | 19 |
| <i>Loxodonta africana</i> TSHB     | 1 | MTAI--FVMSILF---GFI-CG-----QT-M                                                                | 19 |
| <i>Homo sapiens</i> FSHB           | 1 | MKTLQ-FFFLFCC---WKAIC-C-----NS----                                                             | 20 |
| <i>Pan troglodytes</i> FSHB        | 1 | MKTLQ-FFFLFCC---WKAIC-C-----NS----                                                             | 20 |
| <i>Pongo abelii</i> FSHB           | 1 | MKTVQ-FFFLFCC---WKAIC-C-----NS----                                                             | 20 |
| <i>Nomascus leucogenys</i> FSHB    | 1 | MKTVQ-FFFLFCC---WKAIC-S-----NS----                                                             | 20 |
| <i>Macaca mulatta</i> FSHB         | 1 | MKTVQ-FCFLFCC---WKAIC-C-----NS----                                                             | 20 |
| <i>Callithrix jacchus</i> FSHB     | 1 | MKTVQ-FCFLFCC---WKAIC-C-----NS----                                                             | 20 |
| <i>Mus musculus</i> FshB           | 1 | MMKLIQ-LCILFWC---WRAIC-C-----HS----                                                            | 21 |
| <i>Rattus norvegicus</i> FshB      | 1 | MMKSIQ-LCILLWC---LRAVC-C-----HS----                                                            | 21 |
| <i>Cavia porcellus</i> FSHB        | 1 | MKSIQ-FCFFFCC---WKAIC-C-----NG----                                                             | 20 |
| <i>Oryctolagus cuniculus</i> FSHB  | 1 | MKSVQ-FCFLFCC---WKAIC-C-----SS----                                                             | 20 |
| <i>Ochotona princeps</i> FSHB      | 1 | MKSVL-FCFLFCC---WKAIC-C-----SS----                                                             | 20 |
| <i>Bos taurus</i> FSHB             | 1 | MKSVQ-FCFLFCC---WRAIC-C-----RS----                                                             | 20 |
| <i>Vicugna pacos</i> FSHB          | 1 | MKSLH-FCFLFCC---WKAIC-C-----NS----                                                             | 20 |
| <i>Equus caballus</i> FSHB         | 1 | MKSVQ-FCFLFCC---WKAVC-C-----NS----                                                             | 20 |
| <i>Canis lupus familiaris</i> FSHB | 1 | MRSVR-FCFLFCC---WRAAC-G-----AG----                                                             | 20 |
| <i>Myotis lucifugus</i> FSHB       | 1 | MKSVQ-LYFLLCC---WKAMC-C-----NS----                                                             | 20 |
| <i>Pteropus vampyrus</i> FSHB      | 1 | MKSVQ-LCFLFCF---WKAIC-C-----NS----                                                             | 20 |
| <i>Sorex araneus</i> FSHB          | 1 | MKPVQ-FCFLFCC---WKALC-S-----YS----                                                             | 20 |
| <i>Dasyurus novemcinctus</i> FSHB  | 1 | MKAIQ-FCFLFYC---WKAIC-C-----HS----                                                             | 20 |

|                                          |   |     |    |       |     |      |     |     |     |     |       |     |      |       |      |     |     |      |      |      |    |     |     |      |      |      |      |    |
|------------------------------------------|---|-----|----|-------|-----|------|-----|-----|-----|-----|-------|-----|------|-------|------|-----|-----|------|------|------|----|-----|-----|------|------|------|------|----|
| <i>Choloepus hoffmanni</i> FSHB          | 1 | MKS | VQ | -FC   | FL  | FYC  | --- | WK  | VM  | -C  | ----- | NS  | ---- | 20    |      |     |     |      |      |      |    |     |     |      |      |      |      |    |
| <i>Loxodonta africana</i> FSHB           | 1 | MKS | IQ | -FY   | FL  | FCC  | --- | WK  | AM  | -C  | ----- | SS  | ---- | 20    |      |     |     |      |      |      |    |     |     |      |      |      |      |    |
| <i>Homo sapiens</i> LHB                  | 1 | MEM | LQ | ----- | LL  | LLLL | LS  | MG  | GA  | WA  | ----- | SRE | PLR  | 26    |      |     |     |      |      |      |    |     |     |      |      |      |      |    |
| <i>Pan troglodytes</i> LHB               | 1 | MEM | LQ | ----- | LL  | LLLL | LS  | MG  | GA  | WA  | ----- | SRE | PLR  | 26    |      |     |     |      |      |      |    |     |     |      |      |      |      |    |
| <i>Macaca mulatta</i> LHB                | 1 | MEM | LQ | ----- | LLL | WLLL | LS  | MG  | GA  | RA  | ----- | SRE | PLR  | 26    |      |     |     |      |      |      |    |     |     |      |      |      |      |    |
| <i>Mus musculus</i> LhB                  | 1 | MER | LQ | ----- | LLL | WLLL | LS  | PS  | VV  | WA  | ----- | SRG | PLR  | 26    |      |     |     |      |      |      |    |     |     |      |      |      |      |    |
| <i>Rattus norvegicus</i> LhB             | 1 | MER | LQ | ----- | LLL | WLLL | LS  | PS  | VV  | WA  | ----- | SRG | PLR  | 26    |      |     |     |      |      |      |    |     |     |      |      |      |      |    |
| <i>Cavia porcellus</i> LHB               | 1 | MEM | LQ | ----- | LLL | GLLL | LS  | TS  | GS  | VW  | ----- | SRG | PLR  | 26    |      |     |     |      |      |      |    |     |     |      |      |      |      |    |
| <i>Spermophilus tridecemlineatus</i> LHB | 1 | MEM | LQ | ----- | LLL | WLLL | LS  | MS  | GS  | VW  | ----- | SRG | PLR  | 26    |      |     |     |      |      |      |    |     |     |      |      |      |      |    |
| <i>Ochotona princeps</i> LHB             | 1 | MEL | LQ | ----- | LLL | WLLL | LS  | GM  | GG  | VW  | ----- | SRG | PLR  | 26    |      |     |     |      |      |      |    |     |     |      |      |      |      |    |
| <i>Canis lupus familiaris</i> LHB        | 1 | MET | LQ | ----- | LLL | WLLL | LS  | VS  | GG  | VW  | ----- | SRG | PLR  | 26    |      |     |     |      |      |      |    |     |     |      |      |      |      |    |
| <i>Homo sapiens</i> CGB1                 | 1 | MEM | FQ | ----- | LLL | LLLL | LS  | MG  | GT  | WA  | ----- | SKE | PLR  | 26    |      |     |     |      |      |      |    |     |     |      |      |      |      |    |
| <i>Homo sapiens</i> CGB2                 | 1 | MEM | FQ | ----- | LLL | LLLL | LS  | MG  | GT  | WA  | ----- | SKE | PLR  | 26    |      |     |     |      |      |      |    |     |     |      |      |      |      |    |
| <i>Homo sapiens</i> CGB3                 | 1 | MEM | FQ | ----- | LLL | LLLL | LS  | MG  | GT  | WA  | ----- | SKE | PLR  | 26    |      |     |     |      |      |      |    |     |     |      |      |      |      |    |
| <i>Homo sapiens</i> CGB4                 | 1 | MEM | FQ | ----- | LLL | LLLL | LS  | MG  | GT  | WA  | ----- | SKE | PLR  | 26    |      |     |     |      |      |      |    |     |     |      |      |      |      |    |
| <i>Homo sapiens</i> CGB5                 | 1 | MEM | FQ | ----- | LLL | LLLL | LS  | MG  | GT  | WA  | ----- | SRE | MLR  | 26    |      |     |     |      |      |      |    |     |     |      |      |      |      |    |
| <i>Pan troglodytes</i> CGB1              | 1 | MEM | FQ | ----- | LLL | LLLL | LS  | MG  | GT  | WA  | ----- | SKE | PLR  | 26    |      |     |     |      |      |      |    |     |     |      |      |      |      |    |
| <i>Pongo abelii</i> CGB1                 | 1 | MEM | LQ | ----- | LLL | LMLL | LS  | MG  | GT  | WA  | ----- | SKE | PLR  | 26    |      |     |     |      |      |      |    |     |     |      |      |      |      |    |
| <i>Pongo abelii</i> CGB2                 | 1 | MEM | LQ | ----- | LLL | LMLL | LS  | MG  | GT  | WA  | ----- | SKE | PLR  | 26    |      |     |     |      |      |      |    |     |     |      |      |      |      |    |
| <i>Pongo abelii</i> CGB3                 | 1 | MEM | LQ | ----- | LLL | LMLL | LS  | MG  | RT  | WA  | ----- | SKE | PLR  | 26    |      |     |     |      |      |      |    |     |     |      |      |      |      |    |
| <i>Macaca mulatta</i> CGB1               | 1 | MEM | LQ | ----- | LLL | WLLL | LS  | MG  | GA  | RA  | ----- | SRE | PLR  | 26    |      |     |     |      |      |      |    |     |     |      |      |      |      |    |
|                                          |   |     |    |       |     |      |     |     |     |     |       |     |      |       |      |     |     |      |      |      |    |     |     |      |      |      |      |    |
| <i>Homo sapiens</i> GPA1                 | 1 | M   | DY | RK    | YAA | AIF  | --- | LVT | --- | SVF | -LHV  | LHS | ---  | APD   | ---- | 27  |     |      |      |      |    |     |     |      |      |      |      |    |
| <i>Homo sapiens</i> GPA1                 | 1 | M   | DY | RK    | YAA | AIF  | --- | LVT | --- | SVF | -LHV  | LHS | ---  | APD   | ---- | 27  |     |      |      |      |    |     |     |      |      |      |      |    |
| <i>Pan troglodytes</i> GPA1              | 1 | M   | DC | YR    | KYA | VIF  | --- | LVT | --- | SVF | -LHV  | LHS | ---  | SPD   | ---- | 27  |     |      |      |      |    |     |     |      |      |      |      |    |
| <i>Pongo abelii</i> GPA1                 | 1 | M   | DY | RK    | YAA | AIF  | --- | LVI | --- | SVF | -LHV  | LHS | ---  | APD   | ---- | 27  |     |      |      |      |    |     |     |      |      |      |      |    |
| <i>Nomascus leucogenys</i> GPA1          | 1 | M   | DY | RK    | YAA | AVI  | --- | LVT | --- | SVF | -LHV  | LHS | ---  | APDG  | ---- | 28  |     |      |      |      |    |     |     |      |      |      |      |    |
| <i>Callithrix jacchus</i> GPA1           | 1 | M   | DS | YR    | KYA | AII  | --- | LIT | --- | SVF | -LHI  | LHS | ---  | LPDGE | ---- | 29  |     |      |      |      |    |     |     |      |      |      |      |    |
| <i>Otolemur garnettii</i> GPA1           | 1 | M   | DH | YR    | NCA | AVT  | --- | DAL | --- | SVL | -LYG  | LHS | ---  | FPDGE | ---- | 29  |     |      |      |      |    |     |     |      |      |      |      |    |
| <i>Mus musculus</i> GPA1                 | 1 | M   | DY | RK    | YAA | AVI  | --- | LVM | --- | SMF | -LHI  | LHS | ---  | LPDGD | ---- | 29  |     |      |      |      |    |     |     |      |      |      |      |    |
| <i>Rattus norvegicus</i> GPA1            | 1 | M   | DC | YR    | YAA | AVI  | --- | LVM | --- | SMV | -LHI  | LHS | ---  | LPDGD | ---- | 29  |     |      |      |      |    |     |     |      |      |      |      |    |
| <i>Cavia porcellus</i> GPA1              | 1 | M   | DY | RK    | YTA | AAI  | --- | LAI | --- | CVC | -LHD  | LQS | ---  | FPDRE | ---- | 29  |     |      |      |      |    |     |     |      |      |      |      |    |
| <i>Oryctolagus cuniculus</i> GPA1        | 1 | M   | GY | RK    | YAA | AVI  | --- | DAT | --- | SVF | -LHI  | LHS | ---  | FPDGE | ---- | 29  |     |      |      |      |    |     |     |      |      |      |      |    |
| <i>Bos taurus</i> GPA1                   | 1 | M   | DY | RK    | YAA | AVI  | --- | LAI | --- | SLF | -LQI  | LHS | ---  | FPDGE | ---- | 29  |     |      |      |      |    |     |     |      |      |      |      |    |
| <i>Equus caballus</i> GPA1               | 1 | M   | DY | RK    | HAA | AVI  | --- | DAT | --- | SVF | -LHI  | LHS | ---  | FPDGE | ---- | 29  |     |      |      |      |    |     |     |      |      |      |      |    |
| <i>Canis lupus familiaris</i> GPA1       | 1 | M   | DY | RK    | YAV | VII  | --- | LAA | --- | SVF | -LHI  | LHS | ---  | FPDGE | ---- | 29  |     |      |      |      |    |     |     |      |      |      |      |    |
| <i>Myotis lucifugus</i> GPA1             | 1 | M   | DY | RK    | HAA | AVI  | --- | DAT | --- | FVF | -LHI  | LHS | ---  | FPDGE | ---- | 29  |     |      |      |      |    |     |     |      |      |      |      |    |
| <i>Erinaceus europaeus</i> GPA1          | 1 | M   | DS | YR    | KYA | AAV  | --- | LAM | --- | SVF | -LHI  | LHS | ---  | FPDGE | ---- | 29  |     |      |      |      |    |     |     |      |      |      |      |    |
| <i>Dasypus novemcinctus</i> GPA1         | 1 | M   | DY | RK    | YAA | AVI  | --- | DAT | --- | FMF | -LHI  | LHS | ---  | FPDGE | ---- | 29  |     |      |      |      |    |     |     |      |      |      |      |    |
| <i>Loxodonta africana</i> GPA1           | 1 | M   | DY | RK    | YAV | VII  | --- | DAT | --- | SVF | -LHL  | LHS | ---  | FPDGE | ---- | 29  |     |      |      |      |    |     |     |      |      |      |      |    |
| <i>Procavia capensis</i> GPA1            | 1 | M   | DY | RK    | HAV | VII  | --- | DAT | --- | SVF | -LHL  | LHS | ---  | FPDGE | ---- | 29  |     |      |      |      |    |     |     |      |      |      |      |    |
| <i>Homo sapiens</i> GPA2                 | 1 | M   | P  | MA    | SQ  | T    | L   | V   | --- | I   | Y     | L   | V    | L     | A    | --- | QE  | ---- | 25   |      |    |     |     |      |      |      |      |    |
| <i>Pan troglodytes</i> GPA2              | 1 | M   | P  | MA    | SQ  | T    | L   | V   | --- | I   | Y     | L   | V    | L     | A    | --- | QE  | ---- | 25   |      |    |     |     |      |      |      |      |    |
| <i>Gorilla gorilla</i> GPA2              | 1 | M   | P  | MA    | SQ  | T    | L   | V   | --- | I   | C     | L   | V    | L     | A    | --- | QE  | ---- | 25   |      |    |     |     |      |      |      |      |    |
| <i>Pongo abelii</i> GPA2                 | 1 | M   | P  | MA    | SQ  | T    | L   | V   | --- | I   | C     | L   | V    | L     | A    | --- | QE  | ---- | 25   |      |    |     |     |      |      |      |      |    |
| <i>Macaca mulatta</i> GPA2               | 1 | M   | L  | M     | A   | SQ   | T   | L   | V   | --- | I     | C   | L    | V     | L    | A   | --- | QE   | ---- | 25   |    |     |     |      |      |      |      |    |
| <i>Papio hamadryas</i> GPA2              | 1 | M   | L  | M     | A   | SQ   | T   | L   | V   | --- | I     | C   | L    | V     | L    | A   | --- | QE   | ---- | 25   |    |     |     |      |      |      |      |    |
| <i>Microcebus murinus</i> GPA2           | 1 | M   | P  | T     | A   | S    | P   | H   | T   | L   | ---   | I   | C    | L     | V    | L   | A   | ---  | QE   | ---- | 25 |     |     |      |      |      |      |    |
| <i>Otolemur garnettii</i> GPA2           | 1 | M   | P  | M     | A   | F    | Q   | P   | L   | L   | ---   | I   | C    | L     | V    | L   | A   | ---  | QE   | ---- | 25 |     |     |      |      |      |      |    |
| <i>Mus musculus</i> GPA2                 | 1 | M   | P  | M     | A   | -P   | R   | V   | L   | L   | ---   | I   | C    | L     | G    | L   | A   | ---  | PE   | ---- | 24 |     |     |      |      |      |      |    |
| <i>Rattus norvegicus</i> GPA2            | 1 | M   | P  | M     | A   | -P   | R   | V   | L   | L   | ---   | F   | C    | L     | G    | L   | A   | ---  | LE   | ---  | A  | 25  |     |      |      |      |      |    |
| <i>Dipodomys ordii</i> GPA2              | 1 | --- | M  | A     | S   | L    | P   | A   | L   | --- | I     | S   | L    | V     | L    | V   | --- | V    | S    | E    | G  | Q   | --- | QE   | ---- | 23   |      |    |
| <i>Cavia porcellus</i> GPA2              | 1 | M   | L  | M     | A   | S    | P   | G   | A   | L   | ---   | I   | C    | A     | V    | L   | A   | ---  | V    | S    | E  | G   | R   | G    | ---  | RE   | ---- | 25 |
| <i>Ochotona princeps</i> GPA2            | 1 | --- | M  | R     | S   | P    | P   | A   | L   | --- | I     | Y   | L    | V     | ---  | I   | T   | E    | G    | W    | G  | --- | RE  | ---- | 21   |      |      |    |
| <i>Bos taurus</i> GPA2                   | 1 | M   | P  | M     | A   | SQ   | T   | L   | L   | --- | I     | C   | L    | L     | L    | A   | --- | V    | T    | E    | G  | Q   | S   | ---  | QQ   | ---- | 25   |    |
| <i>Canis lupus familiaris</i> GPA2       | 1 | --- | M  | A     | SQ  | T    | L   | F   | --- | I   | C     | L   | V    | L     | A    | --- | V   | T    | E    | G    | W  | G   | --- | RQ   | ---- | 23   |      |    |
| <i>Myotis lucifugus</i> GPA2             | 1 | M   | P  | M     | A   | SQ   | T   | L   | L   | --- | F     | C   | L    | F     | L    | V   | --- | V    | T    | E    | G  | R   | G   | ---  | QQ   | ---- | 25   |    |
| <i>Loxodonta africana</i> GPA2           | 1 | --- | M  | A     | SQ  | T    | L   | L   | --- | I   | C     | L   | V    | L     | A    | --- | V   | T    | E    | G    | W  | A   | --- | GA   | ---- | 23   |      |    |

|                                  |    |              |                 |           |              |     |    |
|----------------------------------|----|--------------|-----------------|-----------|--------------|-----|----|
|                                  | 60 | 70           | 80              | 90        | 100          | 110 |    |
| <i>Homo sapiens</i> PREA1        | 25 | -WWVAVC----- | KQV-CTRVGTY--   | A-VC----- | WCSWNTGRFTGC |     | 55 |
| <i>Homo sapiens</i> PREA2        | 25 | -WWVAVC----- | KQV-CTRVGTY--   | A-VC----- | WCSWNTGRFTGC |     | 55 |
| <i>Homo sapiens</i> PREA3        | 25 | -WWVAVC----- | KQV-CTRVGTY--   | A-VC----- | WCSWNTGRFTGC |     | 55 |
| <i>Pan troglodytes</i> PREA1     | 25 | -WWVAVC----- | KQV-CTRVGTY--   | A-VC----- | WCSWNTGRFTGC |     | 55 |
| <i>Pongo abelii</i> PREA1        | 25 | -WWVAVC----- | KQV-CTRVGTC--   | A-AC----- | RCSWNTGRSTGC |     | 55 |
| <i>Nomascus leucogenys</i> PREA1 | 25 | -WWVAVC----- | KQV-CTHVGTGTC-- | A-AC----- | WWSWDTGRSTGC |     | 55 |
| <i>Homo sapiens</i> PREB         | 25 | -WWVAVR----- | KQV-CTRVGTC--   | A-AC----- | WCSWSTGRSTAC |     | 55 |
| <i>Pan troglodytes</i> PREB      | 25 | -WWVAVC----- | KQV-CTRVGTC--   | A-AC----- | WCSWSTGRSTGC |     | 55 |
| <i>Pongo abelii</i> PREB         | 25 | -WWVAVC----- | KQA-CTRVGTC--   | A-AC----- | WCSWNTGRSTGC |     | 55 |
| <i>Macaca mulatta</i> PREB       | 25 | -WWVAVC----- | KQV-CTRVGTC--   | A-AC----- | WCSWNTGRSTGR |     | 55 |
| <i>Papio hamadryas</i> PREB      | 25 | -RWVAVC----- | KQV-CTRVGTC--   | A-AC----- | WCSWNTGRSTGR |     | 55 |

|                                    |    |              |                                 |            |              |          |    |
|------------------------------------|----|--------------|---------------------------------|------------|--------------|----------|----|
| <i>Homo sapiens</i> FSHB           | 21 | -----        | CEL <sup>H</sup> --NITIAIEKEE-- | C-R-F----- | C-ISINTTWC-- | A--GY--C | 50 |
| <i>Homo sapiens</i> GPB5           | 32 | TF-V-GCAVR-- | EFTFLAKKPG--                    | C-R-G----- | LRITTDAC--   | W--GR--C | 64 |
| <i>Pan troglodytes</i> GPB5        | 32 | TF-V-GCAVR-- | EFTFLAKKPG--                    | C-R-G----- | LRITTDAC--   | W--GR--C | 64 |
| <i>Pongo abelii</i> GPB5           | 32 | TF-V-GCAVR-- | EFTFLAKKPG--                    | C-R-G----- | LRITTDAC--   | W--GR--C | 64 |
| <i>Macaca mulatta</i> GPB5         | 32 | TF-V-GCAVR-- | EFTFLAKKPG--                    | C-R-G----- | LRITTDAC--   | W--GR--C | 64 |
| <i>Papio hamadryas</i> GPB5        | 32 | TF-V-GCAVR-- | EFTFLAKKPG--                    | C-R-G----- | LRITTDAC--   | W--GR--C | 64 |
| <i>Callithrix jacchus</i> GPB5     | 32 | TF-V-GCAVR-- | EFTFLAKKPG--                    | C-K-G----- | LRITTDAC--   | W--GR--C | 64 |
| <i>Microcebus murinus</i> GPB5     | 33 | TF-V-GCAVR-- | EFTFLAKKPG--                    | C-R-G----- | LRITTDAC--   | W--GR--C | 65 |
| <i>Tupaia belangeri</i> GPB5       | 32 | TF-V-GCAVR-- | EFTFLAKKPG--                    | C-R-G----- | LRITTDAC--   | W--GR--C | 64 |
| <i>Mus musculus</i> GpB5           | 32 | TF-V-GCAVR-- | EFTFLAKKPG--                    | C-R-G----- | LRITTDAC--   | W--GR--C | 64 |
| <i>Rattus norvegicus</i> GpB5      | 31 | TF-V-GCAVR-- | EFTFVAKKPG--                    | C-R-G----- | LRITTDAC--   | W--GR--C | 63 |
| <i>Dipodomys ordii</i> GPB5        | 32 | TF-V-GCAVR-- | EFTFLAKKPG--                    | C-R-G----- | LRITTDAC--   | W--GR--C | 64 |
| <i>Cavia porcellus</i> GPB5        | 32 | TF-V-GCAVR-- | EFTFLAKKPG--                    | C-K-G----- | LRITTDAC--   | W--GR--C | 64 |
| <i>Oryctolagus cuniculus</i> GPB5  | 32 | TF-V-GCAVR-- | EFTFLAKKPG--                    | C-R-G----- | LRITTDAC--   | W--GR--C | 64 |
| <i>Ochotona princeps</i> GPB5      | 32 | TF-L-GCAVR-- | EFTFLAKKPG--                    | C-R-G----- | LRITTDAC--   | W--GR--C | 64 |
| <i>Tursiops truncatus</i> GPB5     | 32 | TF-V-GCAVR-- | EFTFLAKKPG--                    | C-K-G----- | LRITTDAC--   | W--GR--C | 64 |
| <i>Bos taurus</i> GPB5             | 32 | TF-V-GCAVR-- | EFTFLAKKPG--                    | C-R-G----- | LRITTDAC--   | W--GR--C | 64 |
| <i>Equus caballus</i> GPB5         | 32 | TF-V-GCAVR-- | EFTFLAKKPG--                    | C-R-G----- | LRITTDAC--   | W--GR--C | 64 |
| <i>Canis lupus familiaris</i> GPB5 | 32 | TF-V-GCAVR-- | EFTFVAKKPG--                    | C-R-G----- | LRITTDAC--   | W--GR--C | 64 |
| <i>Myotis lucifugus</i> GPB5       | 32 | TF-V-GCAVR-- | EFTFLAKKPG--                    | C-R-G----- | LRITTDAC--   | W--GR--C | 64 |
| <i>Erinaceus europaeus</i> GPB5    | 32 | TF-V-GCAVR-- | EFTFLAKKPG--                    | C-R-G----- | LRITTDAC--   | W--GR--C | 64 |
| <i>Dasyurus novemcinctus</i> GPB5  | 32 | TF-V-GCAVR-- | EFTFLAKKPG--                    | C-R-G----- | LRITTDAC--   | W--GR--C | 64 |
| <i>Echinops telfairi</i> GPB5      | 32 | TF-V-GCAVR-- | EFTFVAKKPG--                    | C-R-G----- | LRITTDAC--   | W--GR--C | 64 |
| <i>Loxodonta africana</i> GPB5     | 32 | TF-V-GCAVR-- | EFTFVAKKPG--                    | C-R-G----- | LRITTDAC--   | W--GR--C | 64 |
| <i>Homo sapiens</i> TSHB           | 20 | SF----       | CIPT--EYIMHIERRE--              | C-A-Y----- | CLTINTTIC--  | A--GY--C | 51 |
| <i>Macaca mulatta</i> TSHB         | 20 | SF----       | CIPT--EYIMHIERRE--              | C-A-Y----- | CLTINTTIC--  | A--GY--C | 51 |
| <i>Papio hamadryas</i> TSHB        | 20 | SF----       | CIPT--EYIMHIERRE--              | C-A-Y----- | CLTINTTIC--  | A--GY--C | 51 |
| <i>Tarsius syrichta</i> TSHB       | 20 | SF----       | CIPT--EYIMHIERRE--              | C-A-Y----- | CLTINTTIC--  | A--GY--C | 51 |
| <i>Otolemur garnettii</i> TSHB     | 20 | SF----       | CVPT--EYIMHVERRE--              | C-A-Y----- | CLTINTTIC--  | A--GY--C | 51 |
| <i>Tupaia belangeri</i> TSHB       | 20 | SF----       | CIPT--EYIMHIERRE--              | C-A-Y----- | CLTINTTIC--  | A--GY--C | 51 |
| <i>Mus musculus</i> TshB           | 20 | SF----       | CIPT--EYIMYVDRRE--              | C-A-Y----- | CLTINTTIC--  | A--GY--C | 51 |
| <i>Rattus norvegicus</i> TshB      | 20 | SF----       | CIPT--EYIMYVDRRE--              | C-A-Y----- | CLTINTTIC--  | A--GY--C | 51 |
| <i>Cavia porcellus</i> TSHB        | 20 | SF----       | CIPT--EYIMHIDRRE--              | C-A-Y----- | CLTINTTIC--  | A--GY--C | 51 |
| <i>Oryctolagus cuniculus</i> TSHB  | 20 | SF----       | CIPT--EYIMHVDRRE--              | C-A-Y----- | CLTINTTIC--  | A--GY--C | 51 |
| <i>Tursiops truncatus</i> TSHB     | 20 | AL----       | CIPT--EYIMMVERKE--              | C-A-Y----- | CLTINTTIC--  | A--GY--C | 51 |
| <i>Bos taurus</i> TSHB             | 20 | SF----       | CIPT--EYIMMVERKE--              | C-A-Y----- | CLTINTTIC--  | A--GY--C | 51 |
| <i>Vicugna pacos</i> TSHB          | 20 | SF----       | CIPT--EYIMMVERKE--              | C-A-Y----- | CLTINTTIC--  | A--GY--C | 51 |
| <i>Equus caballus</i> TSHB         | 20 | SF----       | CIPT--EYIMMVERKE--              | C-A-Y----- | CLTINTTIC--  | A--GY--C | 51 |
| <i>Canis lupus familiaris</i> TSHB | 20 | SF----       | CFPT--EYIMHVERKE--              | C-A-Y----- | CLTINTTIC--  | A--GY--C | 51 |
| <i>Myotis lucifugus</i> TSHB       | 20 | SF----       | CIPT--EYIMMVERKE--              | C-D-Y----- | CLTINTTIC--  | A--GY--C | 51 |
| <i>Dasyurus novemcinctus</i> TSHB  | 20 | SF----       | CVPT--EYIMHVERRE--              | C-A-Y----- | CLTINTTIC--  | A--GY--C | 51 |
| <i>Echinops telfairi</i> TSHB      | 20 | SF----       | CVPT--EYIMHVERRE--              | C-A-Y----- | CLTINTTIC--  | A--GY--C | 51 |
| <i>Loxodonta africana</i> TSHB     | 20 | SF----       | CVPT--EYIMHVERWE--              | C-A-Y----- | CLTINTTIC--  | A--GY--C | 51 |
| <i>Homo sapiens</i> FSHB           | 21 | -----        | CEL <sup>H</sup> --NITIAIEKEE-- | C-R-F----- | C-ISINTTWC-- | A--GY--C | 50 |
| <i>Pan troglodytes</i> FSHB        | 21 | -----        | CEL <sup>H</sup> --NITIAIEKEE-- | C-R-F----- | C-ISINTTWC-- | A--GH--C | 50 |
| <i>Pongo abelii</i> FSHB           | 21 | -----        | CEL <sup>H</sup> --NITIAIEKEE-- | C-R-F----- | C-ISINTTWC-- | A--GY--C | 50 |
| <i>Nomascus leucogenys</i> FSHB    | 21 | -----        | QLT--NITIAIEKEE--               | C-R-F----- | C-ISINTTWC-- | A--GY--C | 50 |
| <i>Macaca mulatta</i> FSHB         | 21 | -----        | CEL <sup>H</sup> --NITIAIEKEE-- | C-R-F----- | C-ISINTTWC-- | A--GY--C | 50 |
| <i>Callithrix jacchus</i> FSHB     | 21 | -----        | CEL <sup>H</sup> --NITIAIEKEE-- | C-R-F----- | C-ISINTTWC-- | A--GY--C | 50 |
| <i>Mus musculus</i> FshB           | 22 | -----        | CEL <sup>H</sup> --NITISVEKEE-- | C-R-F----- | C-ISINTTWC-- | A--GY--C | 51 |
| <i>Rattus norvegicus</i> FshB      | 22 | -----        | CEL <sup>H</sup> --NITISVEKEE-- | C-R-F----- | C-ISINTTWC-- | E--GY--C | 51 |
| <i>Cavia porcellus</i> FSHB        | 21 | -----        | CEL <sup>H</sup> --NITITVEREE-- | C-R-F----- | C-ISVNTTWC-- | A--GY--C | 50 |
| <i>Oryctolagus cuniculus</i> FSHB  | 21 | -----        | CEL <sup>H</sup> --NITIAVEKEE-- | C-R-F----- | C-ISINTTWC-- | S--GY--C | 50 |
| <i>Ochotona princeps</i> FSHB      | 21 | -----        | CEL <sup>H</sup> --NITIAVEKAE-- | C-R-F----- | C-ISVNTTWC-- | A--GY--C | 50 |
| <i>Bos taurus</i> FSHB             | 21 | -----        | CEL <sup>H</sup> --NITITVEKEE-- | C-G-F----- | C-ISINTTWC-- | A--GY--C | 50 |
| <i>Vicugna pacos</i> FSHB          | 21 | -----        | CEL <sup>H</sup> --NITITVEKEE-- | C-G-F----- | C-ISINTTWC-- | A--GY--C | 50 |
| <i>Equus caballus</i> FSHB         | 21 | -----        | CEL <sup>H</sup> --NITIAVEKEE-- | C-G-F----- | C-ISINTTWC-- | A--GY--C | 50 |
| <i>Canis lupus familiaris</i> FSHB | 21 | -----        | CEL <sup>H</sup> --NITIAVEKEE-- | C-R-F----- | C-ISVNTTWC-- | A--GY--C | 50 |
| <i>Myotis lucifugus</i> FSHB       | 21 | -----        | CEL <sup>H</sup> --NITITVEKEE-- | C-R-F----- | C-ISINTTWC-- | A--GY--C | 50 |
| <i>Pteropus vampyrus</i> FSHB      | 21 | -----        | CEL <sup>H</sup> --NITITVEREE-- | C-R-F----- | C-ISINTTWC-- | A--GY--C | 50 |
| <i>Sorex araneus</i> FSHB          | 21 | -----        | CEL <sup>H</sup> --NITITVEREE-- | C-R-F----- | C-ISINTTWC-- | A--GY--C | 50 |
| <i>Dasyurus novemcinctus</i> FSHB  | 21 | -----        | CEL <sup>H</sup> --NITIAVEKEE-- | C-R-F----- | C-ISINTTWC-- | A--GY--C | 50 |

|                                          |    |         |          |            |    |             |             |            |        |        |      |    |    |
|------------------------------------------|----|---------|----------|------------|----|-------------|-------------|------------|--------|--------|------|----|----|
| <i>Choloepus hoffmanni</i> FSHB          | 21 | ----    | CELT--NI | TIKVEKEE   | -C | -R-F        | ----        | C-ISINTTW  | C      | -A--GY | ---- | C  | 50 |
| <i>Loxodonta africana</i> FSHB           | 21 | ----    | CELT--NV | IAVEKEE    | -C | -R-F        | ----        | C-ISINTTW  | C      | -A--GY | ---- | C  | 50 |
| <i>Homo sapiens</i> LHB                  | 27 | PW----  | CHPI--NA | LAVEKEG    | -C | -P-V        | ----        | C-ITVNTTIC | A      | -GY    | ---- | C  | 58 |
| <i>Pan troglodytes</i> LHB               | 27 | PW----  | CHPI--NA | LAVEKEG    | -C | -P-V        | ----        | C-ITVNTTIC | A      | -GY    | ---- | C  | 58 |
| <i>Macaca mulatta</i> LHB                | 27 | PL----  | CRPI--NA | LAAEKEA    | -C | -P-V        | ----        | C-ITVNTTIC | A      | -GY    | ---- | C  | 58 |
| <i>Mus musculus</i> LhB                  | 27 | PL----  | CRPV--NA | LAAENEK    | -C | -P-V        | ----        | C-ITFTTSTC | A      | -GY    | ---- | C  | 58 |
| <i>Rattus norvegicus</i> LhB             | 27 | PL----  | CRPV--NA | LAAENEK    | -C | -P-V        | ----        | C-ITFTTSTC | A      | -GY    | ---- | C  | 58 |
| <i>Cavia porcellus</i> LHB               | 27 | PY----  | CRPI--NA | LAAEKEA    | -C | -P-I        | ----        | C-VTFTTSTC | A      | -GY    | ---- | C  | 58 |
| <i>Spermophilus tridecemlineatus</i> LHB | 27 | PL----  | CRPI--NA | LAAEHEA    | -C | -P-V        | ----        | C-ITFTTSTC | A      | -GY    | ---- | C  | 58 |
| <i>Ochotona princeps</i> LHB             | 27 | PL----  | CRPV--NA | LAAEKEA    | -C | -P-V        | ----        | C-ITVNTTIC | A      | -GY    | ---- | C  | 58 |
| <i>Canis lupus familiaris</i> LHB        | 27 | PL----  | CRPI--NA | LAAEKEA    | -C | -P-V        | ----        | C-ITFTTSTC | A      | -GY    | ---- | C  | 58 |
| <i>Homo sapiens</i> CGB1                 | 27 | PR----  | CRPI--NA | LAVEKEG    | -C | -P-V        | ----        | C-ITVNTTIC | A      | -GY    | ---- | C  | 58 |
| <i>Homo sapiens</i> CGB2                 | 27 | PR----  | CRPI--NA | LAVEKEG    | -C | -P-V        | ----        | C-ITVNTTIC | A      | -GY    | ---- | C  | 58 |
| <i>Homo sapiens</i> CGB3                 | 27 | PR----  | CRPI--NA | LAVEKEG    | -C | -P-V        | ----        | C-ITVNTTIC | A      | -GY    | ---- | C  | 58 |
| <i>Homo sapiens</i> CGB4                 | 27 | PR----  | CRPI--NA | LAVEKEG    | -C | -P-V        | ----        | C-ITVNTTIC | A      | -GY    | ---- | C  | 58 |
| <i>Homo sapiens</i> CGB5                 | 27 | PR----  | CRPI--NA | LAVEKEG    | -C | -P-V        | ----        | C-ITVNTTIC | A      | -GY    | ---- | C  | 58 |
| <i>Pan troglodytes</i> CGB1              | 27 | PR----  | CRPI--NA | LAVEKEG    | -C | -P-V        | ----        | C-ITVNTTIC | A      | -GY    | ---- | C  | 58 |
| <i>Pongo abelii</i> CGB1                 | 27 | PR----  | CRPI--NA | LAVEKEG    | -C | -P-V        | ----        | C-ITVNTTIC | A      | -GY    | ---- | C  | 58 |
| <i>Pongo abelii</i> CGB2                 | 27 | PR----  | CRPI--NA | LAVEKEG    | -C | -P-V        | ----        | C-VTVNTTIC | A      | -GY    | ---- | C  | 58 |
| <i>Pongo abelii</i> CGB3                 | 27 | PR----  | CRPI--NA | LAVEKEG    | -C | -P-V        | ----        | C-VTVNTTIC | A      | -GY    | ---- | C  | 58 |
| <i>Macaca mulatta</i> CGB1               | 27 | PL----  | CRPI--NA | LAAEKEA    | -C | -P-V        | ----        | C-ITVNTTIC | A      | -GY    | ---- | C  | 58 |
| <i>Homo sapiens</i> GPA1                 | 28 | ---     | VQDC     | -----      | PE | -C          | -TLQE-NPFFS | -QPGAPILQ  | C      | -M--GC | ---- | C  | 56 |
| <i>Homo sapiens</i> GPA1                 | 28 | ---     | VQDC     | -----      | PE | -C          | -TLQE-NPFFS | -QPGAPILQ  | C      | -M--GC | ---- | C  | 56 |
| <i>Pan troglodytes</i> GPA1              | 28 | ---     | VQDC     | -----      | PE | -C          | -TLQE-NPFFS | -QPGAPILQ  | C      | -M--GC | ---- | C  | 56 |
| <i>Pongo abelii</i> GPA1                 | 28 | ---     | VQDC     | -----      | PE | -C          | -TLQE-NPFFS | -QPGAPILQ  | C      | -M--GC | ---- | C  | 56 |
| <i>Nomascus leucogenys</i> GPA1          | 29 | ---     | VQDC     | -----      | PE | -C          | -QLHE-NPFFS | -QPGAPILQ  | C      | -M--GC | ---- | C  | 57 |
| <i>Callithrix jacchus</i> GPA1           | 30 | -FTAEE  | C-----   | PE         | -C | -KLKE-NKYFS | -RLGAPIYQ   | C          | -M--GC | ----   | C    | 60 |    |
| <i>Otolemur garnettii</i> GPA1           | 30 | -FTVQGC | -----    | PE         | -C | -KLKE-NKYFS | -RLGAPIYQ   | C          | -M--GC | ----   | C    | 60 |    |
| <i>Mus musculus</i> GpA1                 | 30 | -FIIQGC | -----    | PE         | -C | -KLKE-NKYFS | -KLGAPIYQ   | C          | -M--GC | ----   | C    | 60 |    |
| <i>Rattus norvegicus</i> GpA1            | 30 | -LIIQGC | -----    | PE         | -C | -KLKE-NKYFS | -KLGAPIYQ   | C          | -M--GC | ----   | C    | 60 |    |
| <i>Cavia porcellus</i> GPA1              | 30 | -YTMQGC | -----    | PE         | -C | -KLKE-NKLF  | -MLGAPIYQ   | C          | -M--GC | ----   | C    | 60 |    |
| <i>Oryctolagus cuniculus</i> GPA1        | 30 | -FAMQGC | -----    | PE         | -C | -KLKE-NKYFS | -KLGAPIYQ   | C          | -M--GC | ----   | C    | 60 |    |
| <i>Bos taurus</i> GPA1                   | 30 | -FTMQGC | -----    | PE         | -C | -KLKE-NKYFS | -KPDAPIYQ   | C          | -M--GC | ----   | C    | 60 |    |
| <i>Equus caballus</i> GPA1               | 30 | -FTTQDC | -----    | PE         | -C | -KLRE-NKYFF | -KLGAPIYQ   | C          | -K--GC | ----   | C    | 60 |    |
| <i>Canis lupus familiaris</i> GPA1       | 30 | -FTMQGC | -----    | PE         | -C | -KLKE-NKYFS | -KLGAPIYQ   | C          | -M--GC | ----   | C    | 60 |    |
| <i>Myotis lucifugus</i> GPA1             | 30 | -FTMQVC | -----    | PE         | -C | -KLKE-NKYFS | -KLGAPIYQ   | C          | -M--GC | ----   | C    | 60 |    |
| <i>Erinaceus europaeus</i> GPA1          | 30 | -FTMQGC | -----    | PE         | -C | -RLKE-NKYFS | -KLGAPIYQ   | C          | -M--GC | ----   | C    | 60 |    |
| <i>Dasyurus novemcinctus</i> GPA1        | 30 | -FPMQGC | -----    | PE         | -C | -KLKE-NKYFS | -KLGAPIYQ   | C          | -M--GC | ----   | C    | 60 |    |
| <i>Loxodonta africana</i> GPA1           | 30 | -FALQGC | -----    | PE         | -C | -KLKE-NKYFS | -KLGAPIYQ   | C          | -M--GC | ----   | C    | 60 |    |
| <i>Procavia capensis</i> GPA1            | 30 | -FAVQGC | -----    | PE         | -C | -KLKE-NKYFS | -RLGAPIYQ   | C          | -M--GC | ----   | C    | 60 |    |
| <i>Homo sapiens</i> GPA2                 | 26 | -AVIPGC | HLHPFNVT | TVRSRQGT   | -Q | -GS-HVAQA   | -----       | C-V--GH    | ----   | C      | 61   |    |    |
| <i>Pan troglodytes</i> GPA2              | 26 | -AVIPGC | HLHPFNVT | TVRSRQGT   | -Q | -GS-HVAQA   | -----       | C-V--GH    | ----   | C      | 61   |    |    |
| <i>Gorilla gorilla</i> GPA2              | 26 | -AVIPGC | HLHPFNVT | TVRSRQGT   | -Q | -GS-HVAQA   | -----       | C-V--GH    | ----   | C      | 61   |    |    |
| <i>Pongo abelii</i> GPA2                 | 26 | -AVIPGC | HLHPFNVT | TVRSRQGT   | -Q | -GS-HVAQA   | -----       | C-V--GH    | ----   | C      | 61   |    |    |
| <i>Macaca mulatta</i> GPA2               | 26 | -AVIPGC | HLHPFIVT | TVRSRQGT   | -Q | -GS-HMAQA   | -----       | C-V--GH    | ----   | C      | 61   |    |    |
| <i>Papio hamadryas</i> GPA2              | 26 | -AVIPGC | HLHPFNVT | TVRSRQGT   | -Q | -GS-HMAQA   | -----       | C-V--GH    | ----   | C      | 61   |    |    |
| <i>Microcebus murinus</i> GPA2           | 26 | -TAIPGC | HMHPFNVT | TVRSRQGT   | -Q | -GS-HVAQA   | -----       | C-V--GH    | ----   | C      | 61   |    |    |
| <i>Otolemur garnettii</i> GPA2           | 26 | -TAIPGC | HLHPFNVT | TVRSRQGT   | -Q | -GS-HVAQA   | -----       | C-V--GH    | ----   | C      | 61   |    |    |
| <i>Mus musculus</i> GpA2                 | 25 | -TAIPGC | HLHPFNVT | TVRSRDLGT  | -Q | -GS-HVAQA   | -----       | C-V--GH    | ----   | C      | 60   |    |    |
| <i>Rattus norvegicus</i> GpA2            | 26 | -AVIPGC | HLHPFNVT | TVRSRDRHGT | -Q | -GS-HVAQA   | -----       | C-V--GH    | ----   | C      | 62   |    |    |
| <i>Dipodomys ordii</i> GPA2              | 24 | -TAIPGC | YLHSFNVT | MRSRQGT    | -Q | -GS-HVAQA   | -----       | C-V--GH    | ----   | C      | 59   |    |    |
| <i>Cavia porcellus</i> GPA2              | 26 | -AAIPGC | HLHPFNVT | TVRSDPQGT  | -Q | -GS-HVAQA   | -----       | C-V--GH    | ----   | C      | 61   |    |    |
| <i>Ochotona princeps</i> GPA2            | 22 | -PASPGC | HLYPFNVT | IRSDRQGT   | -Q | -GS-HVAQA   | -----       | C-V--GH    | ----   | C      | 57   |    |    |
| <i>Bos taurus</i> GPA2                   | 26 | -AAIPGC | YLHPFNVT | TVRSRQGT   | -Q | -GS-HVAQA   | -----       | C-V--GH    | ----   | C      | 61   |    |    |
| <i>Canis lupus familiaris</i> GPA2       | 24 | -AAIPGC | HLHPFNVT | TVRSRQGT   | -Q | -GS-HVAQA   | -----       | C-V--GH    | ----   | C      | 59   |    |    |
| <i>Myotis lucifugus</i> GPA2             | 26 | -AAIPGC | HLHPFNVT | TVRSRQGT   | -Q | -GS-HVAQA   | -----       | C-V--GH    | ----   | C      | 61   |    |    |
| <i>Loxodonta africana</i> GPA2           | 24 | -ASIPGC | HLHPFNVT | TVRSRQGT   | -Q | -GS-HVAQA   | -----       | C-V--GH    | ----   | C      | 59   |    |    |

|                                    | 120 | 130                                | 140                     | 150 | 160 |  |
|------------------------------------|-----|------------------------------------|-------------------------|-----|-----|--|
| <i>Homo sapiens</i> PREA1          | 56  | ----PSW-K--DFWKPVGP-A-LHVFDVK-C--- | EAQRGLKLTQPFTVACKIDP    | 96  |     |  |
| <i>Homo sapiens</i> PREA2          | 56  | ----PSW-K--DFWKPVGP-A-LHVFDVK-C--- | EAQRGLKLTQPFTVACKIDP    | 96  |     |  |
| <i>Homo sapiens</i> PREA3          | 56  | ----PSW-K--DFWKPVGP-A-LHVFNVK-C--- | EAQRGLKLTQPFTVACKIDP    | 96  |     |  |
| <i>Pan troglodytes</i> PREA1       | 56  | ----PSW-K--DFWKPVGP-A-LHVFDVK-C--- | EAQRGLKLTQPFTVACKIAP    | 96  |     |  |
| <i>Pongo abelii</i> PREA1          | 56  | ----PNW-K--DFWKPVGP-A-PHVFDVK-C--- | EAQRGVKLTQPFTVACRIDP    | 96  |     |  |
| <i>Nomascus leucogenys</i> PREA1   | 56  | ----PSW-K--DFWKPVGP-A-PHVFDVK-C--- | ETQRGLKLTQPFTVACKIDP    | 96  |     |  |
| <i>Homo sapiens</i> PREB           | 56  | ----PSW-K--DFWKPVGP-A-PHVLDVK-R--- | EAQRGLKLTQPFTVACKIDP    | 96  |     |  |
| <i>Pan troglodytes</i> PREB        | 56  | ----PSW-K--DFWKPVGP-A-PHVLDVK-R--- | EAQRGLKLTQPFTVACKIDP    | 96  |     |  |
| <i>Pongo abelii</i> PREB           | 56  | ----PSW-K--DFWKPVGP-A-PHVLDVK-C--- | EAQRG--LTQPFTVACKIDP    | 94  |     |  |
| <i>Macaca mulatta</i> PREB         | 56  | ----PSW-K--DFWKPVGP-A-PHVLDVK-C--- | EAQRGLMLTQPFTVACKIDP    | 96  |     |  |
| <i>Papio hamadryas</i> PREB        | 56  | ----PSW-K--DFWKPVGP-A-PHVLDVK-C--- | EAQRGLMLTQPFTVACKIDP    | 96  |     |  |
|                                    |     |                                    |                         |     |     |  |
| <i>Homo sapiens</i> FSHB           | 51  | ----YTRDLVYK--DP--ARP-KIQ-KT--     | CTFKEL-VYETVRVP--GC---- | 84  |     |  |
| <i>Homo sapiens</i> GPB5           | 65  | ----EWEKPI-L-EP--PYIEAHH-RV--      | CTYNET-KQVTVKLP--NC---- | 99  |     |  |
| <i>Pan troglodytes</i> GPB5        | 65  | ----EWEKPI-L-EP--PYIEAHH-RV--      | CTYNET-KQVTVKLP--NC---- | 99  |     |  |
| <i>Pongo abelii</i> GPB5           | 65  | ----EWEKPI-L-EP--PYIEAHH-RV--      | CTYNET-KHVTVKLP--NC---- | 99  |     |  |
| <i>Macaca mulatta</i> GPB5         | 65  | ----EWEKPI-L-EP--PYIEAHH-RV--      | CTYNET-KQVTVKLP--NC---- | 99  |     |  |
| <i>Papio hamadryas</i> GPB5        | 65  | ----EWEKPI-L-EP--PYIEAHH-RV--      | CTYNET-KQVTVKLP--NC---- | 99  |     |  |
| <i>Callithrix jacchus</i> GPB5     | 65  | ----EWEKPI-L-EP--PYIEAHH-RV--      | CTYNET-KQVTVKLP--NC---- | 99  |     |  |
| <i>Microcebus murinus</i> GPB5     | 66  | ----EWEKPI-L-EP--PYIEAHH-RV--      | CTYNET-KQVTVKLP--NC---- | 100 |     |  |
| <i>Tupaia belangeri</i> GPB5       | 65  | ----EWEKPI-L-EP--PYIEAHH-RV--      | CTYNET-RQVTVKLP--NC---- | 99  |     |  |
| <i>Mus musculus</i> GpB5           | 65  | ----EWEKPI-L-EP--PYIEAYH-RV--      | CTYNET-RQVTVKLP--NC---- | 99  |     |  |
| <i>Rattus norvegicus</i> GpB5      | 64  | ----EWEKPI-L-EP--PYIEAYH-RV--      | CTYNET-RQVTVKLP--NC---- | 98  |     |  |
| <i>Dipodomys ordii</i> GPB5        | 65  | ----KWEKPI-L-QP--PYIEAHH-RV--      | CTYKET-RQVTVQLP--HC---- | 99  |     |  |
| <i>Cavia porcellus</i> GPB5        | 65  | ----EWERPI-L-EP--PYIEAHH-RV--      | CTYNET-RQVTVKLP--KC---- | 99  |     |  |
| <i>Oryctolagus cuniculus</i> GPB5  | 65  | ----EWEKPI-L-EP--PYIEAHH-RV--      | CTYNET-RHVTVKLP--GC---- | 99  |     |  |
| <i>Ochotona princeps</i> GPB5      | 65  | ----EWEKPI-L-EP--PYIEAYH-RV--      | CTYNET-KQVTVKLP--NC---- | 99  |     |  |
| <i>Tursiops truncatus</i> GPB5     | 65  | ----EWEKPI-L-EP--PYIEAHH-RV--      | CTYNET-KQVTVKLP--NC---- | 99  |     |  |
| <i>Bos taurus</i> GPB5             | 65  | ----EWEKPI-L-EP--PYIEAHH-RV--      | CTYNET-KQVTVKLP--NC---- | 99  |     |  |
| <i>Equus caballus</i> GPB5         | 65  | ----EWEKPI-L-EP--PYIEAHH-RV--      | CTYNET-KQVTVKLP--NC---- | 99  |     |  |
| <i>Canis lupus familiaris</i> GPB5 | 65  | ----EWEKPI-L-EP--PYIEAHH-RV--      | CTYNET-RQVTVKLP--NC---- | 99  |     |  |
| <i>Myotis lucifugus</i> GPB5       | 65  | ----EWEKPI-L-EP--PYIEAHH-RV--      | CTYNET-KQVTVKLP--SC---- | 99  |     |  |
| <i>Erinaceus europaeus</i> GPB5    | 65  | ----EWEKPI-L-EP--PYIEAYH-RV--      | CTYNET-KQVTVKLP--NC---- | 99  |     |  |
| <i>Dasyurus novemcinctus</i> GPB5  | 65  | ----EWEKPI-L-EP--PYIEAYH-RV--      | CTYNET-RYKTVKLP--NC---- | 99  |     |  |
| <i>Echinops telfairi</i> GPB5      | 65  | ----EWEKPI-L-EP--PYIEAHH-RV--      | CTYNET-RQVTVKLP--NC---- | 99  |     |  |
| <i>Loxodonta africana</i> GPB5     | 65  | ----EWEKPI-L-EP--PYIEAYH-RV--      | CTYNET-KQVTVKLP--NC---- | 99  |     |  |
| <i>Homo sapiens</i> TSHB           | 52  | ----MTRDINGKLF--KYA-LSQ-DV--       | CTYRDF-IYRTVETP--GC---- | 87  |     |  |
| <i>Macaca mulatta</i> TSHB         | 52  | ----MTRDINGKLF--KYA-LSQ-DV--       | CTYRDF-IYRTVETP--GC---- | 87  |     |  |
| <i>Papio hamadryas</i> TSHB        | 52  | ----MTRDINGKLF--KYA-LSQ-DV--       | CTYRDF-IYRTVETP--GC---- | 87  |     |  |
| <i>Tarsius syrichta</i> TSHB       | 52  | ----MTRDINGKLF--KYA-LSQ-DV--       | CTYRDF-IYRTVETP--GC---- | 87  |     |  |
| <i>Otolemur garnettii</i> TSHB     | 52  | ----MTRDINGKLF--KYA-LSQ-NV--       | CTYRDF-IYRTVETP--GC---- | 87  |     |  |
| <i>Tupaia belangeri</i> TSHB       | 52  | ----MTRDINGKLF--KYA-LSQ-DV--       | CTYRDF-IYRTVETP--GC---- | 87  |     |  |
| <i>Mus musculus</i> TshB           | 52  | ----MTRDINGKLF--KYA-LSQ-DV--       | CTYRDF-IYRTVETP--GC---- | 87  |     |  |
| <i>Rattus norvegicus</i> TshB      | 52  | ----MTRDINGKLF--KYA-LSQ-DV--       | CTYRDF-IYRTVETP--GC---- | 87  |     |  |
| <i>Cavia porcellus</i> TSHB        | 52  | ----MTRDSNRKTFVS--SHA-RFQ-NV--     | CTYGDF-IYKTVETP--GC---- | 87  |     |  |
| <i>Oryctolagus cuniculus</i> TSHB  | 52  | ----MTRDINGKLF--KYA-LSQ-DV--       | CTYRDF-IYRTVETP--GC---- | 87  |     |  |
| <i>Tursiops truncatus</i> TSHB     | 52  | ----MTRDFNGKLF--KYA-LSQ-DV--       | CTYRDF-MYKTVETP--GC---- | 87  |     |  |
| <i>Bos taurus</i> TSHB             | 52  | ----MTRDVNGKLF--KYA-LSQ-DV--       | CTYRDF-MYKTAETP--GC---- | 87  |     |  |
| <i>Vicugna pacos</i> TSHB          | 52  | ----MTRDFNGKLF--KFA-LSQ-DV--       | CTYRDF-MYKTVETP--GC---- | 87  |     |  |
| <i>Equus caballus</i> TSHB         | 52  | ----MTRDINGKLF--KYA-LSQ-DV--       | CTYRDF-MYKTVETP--GC---- | 87  |     |  |
| <i>Canis lupus familiaris</i> TSHB | 52  | ----MTRDINGKLF--KYA-LSQ-DV--       | CTYRDF-MYKTVETP--GC---- | 87  |     |  |
| <i>Myotis lucifugus</i> TSHB       | 52  | ----MTRDINGKQFL--KYA-LSQ-DV--      | CTYGDF-IYKTVETP--GC---- | 87  |     |  |
| <i>Dasyurus novemcinctus</i> TSHB  | 52  | ----MTRDISGKLF--KYA-LSQ-DI--       | CTYRDF-IYRTVETP--GC---- | 87  |     |  |
| <i>Echinops telfairi</i> TSHB      | 52  | ----MTRDINGKLF--KYA-LSQ-DV--       | CTYRDF-IYRTVETP--GC---- | 87  |     |  |
| <i>Loxodonta africana</i> TSHB     | 52  | ----MTRDINGKLF--KYA-LSQ-NV--       | CTYRDF-VYRTVETP--GC---- | 87  |     |  |
| <i>Homo sapiens</i> FSHB           | 51  | ----YTRDLVYK--DP--ARP-KIQ-KT--     | CTFKEL-VYETVRVP--GC---- | 84  |     |  |
| <i>Pan troglodytes</i> FSHB        | 51  | ----YTRDLVYK--DP--ARP-NIQ-KT--     | CTFKEL-VYETVRVP--GC---- | 84  |     |  |
| <i>Pongo abelii</i> FSHB           | 51  | ----YTRDLVYK--DP--ARP-NIQ-KT--     | CTFKEL-VYETVRVP--GC---- | 84  |     |  |
| <i>Nomascus leucogenys</i> FSHB    | 51  | ----YTRDLVFK--DP--ARP-NMQ-KI--     | CTFKEL-VYETVRVP--GC---- | 84  |     |  |
| <i>Macaca mulatta</i> FSHB         | 51  | ----YTRDLVYK--DP--ARP-NIQ-KT--     | CTFKEV-VYETVRVP--GC---- | 84  |     |  |
| <i>Callithrix jacchus</i> FSHB     | 51  | ----YTRDLVYK--DP--ATP-NIQ-TT--     | CTFKEL-VYETVRVP--GC---- | 84  |     |  |
| <i>Mus musculus</i> FshB           | 52  | ----YTRDLVYK--DP--ARP-NTQ-KV--     | CTFKEL-VYETVRVP--GC---- | 85  |     |  |
| <i>Rattus norvegicus</i> FshB      | 52  | ----YTRDLVYK--DP--ARP-NTQ-KV--     | CTFKEL-VYETVRVP--GC---- | 85  |     |  |
| <i>Cavia porcellus</i> FSHB        | 51  | ----YTRDLVYR--DP--ARP-NIQ-KT--     | CTFKEL-VYETVRVP--GC---- | 84  |     |  |
| <i>Oryctolagus cuniculus</i> FSHB  | 51  | ----YTRDLVYK--DP--ARP-NIQ-KI--     | CTFKEL-VYETVRVP--GC---- | 84  |     |  |
| <i>Ochotona princeps</i> FSHB      | 51  | ----YTRDLVYK--DP--ARL-NIQ-KT--     | CTFKEL-VYETVRVP--GC---- | 84  |     |  |
| <i>Bos taurus</i> FSHB             | 51  | ----YTRDLVYR--DP--ARP-NIQ-KT--     | CTFKEL-VYETVRVP--GC---- | 84  |     |  |
| <i>Vicugna pacos</i> FSHB          | 51  | ----YTRDLVYK--DP--ARP-NIQ-KT--     | CTFKEL-VYETVRVP--GC---- | 84  |     |  |
| <i>Equus caballus</i> FSHB         | 51  | ----YTRDLVYK--DP--ARP-NIQ-KT--     | CTFKEL-VYETVRVP--GC---- | 84  |     |  |
| <i>Canis lupus familiaris</i> FSHB | 51  | ----YTRDLVYK--DA--ARP-SIQ-KT--     | CTFREL-VYETVRVP--GC---- | 84  |     |  |
| <i>Myotis lucifugus</i> FSHB       | 51  | ----YTRDLVYK--DP--TRR-NTQ-KA--     | CTFKEL-VYETVRVP--GC---- | 84  |     |  |
| <i>Pteropus vampyrus</i> FSHB      | 51  | ----YTRDLVYK--DP--ARP-NIQ-KT--     | CTFKEL-VYETVRVP--GC---- | 84  |     |  |
| <i>Sorex araneus</i> FSHB          | 51  | ----YTRDLVYK--DP--ARP-NIQ-KT--     | CTFKEL-VYETVRVP--GC---- | 84  |     |  |
| <i>Dasyurus novemcinctus</i> FSHB  | 51  | ----YTRDLVYK--DP--ARP-NIQ-KT--     | CTFKEL-VYETVRVP--GC---- | 84  |     |  |

|                                          |    |                                                        |    |
|------------------------------------------|----|--------------------------------------------------------|----|
| <i>Choloepus hoffmanni</i> FSHB          | 51 | ----YTRDRVYK--DP--ARP-NIQ-KV--CTFKQL-VYETVVRVP--GC---- | 84 |
| <i>Loxodonta africana</i> FSHB           | 51 | ----YTRDLVYK--DP--ARP-NTQ-KT--CTFKEL-VYETVVRVP--GC---- | 84 |
| <i>Homo sapiens</i> LHB                  | 59 | ----PTMMRVLQAVLP--PLP-QV---V--CTYRDV-RFESIRLP--GC----  | 92 |
| <i>Pan troglodytes</i> LHB               | 59 | ----PTMMRVLQAVLP--PLP-QV---V--CTYRDV-RFESIRLP--GC----  | 92 |
| <i>Macaca mulatta</i> LHB                | 59 | ----PTMMRVLQAALL--PLP-QV---V--CTYREV-RFDSIQLP--GC----  | 92 |
| <i>Mus musculus</i> LhB                  | 59 | ----PSMVRVLPALP--PVP-QP---V--CTYREL-RFASVRLP--GC----   | 92 |
| <i>Rattus norvegicus</i> LhB             | 59 | ----PSMVRVLPALP--PVP-QP---V--CTYREL-RFASVRLP--GC----   | 92 |
| <i>Cavia porcellus</i> LHB               | 59 | ----PSMMRVLTTARR--PVP-QL---V--CTYDEL-RFASIRLP--GC----  | 92 |
| <i>Spermophilus tridecemlineatus</i> LHB | 59 | ----PSMVRVLPALP--PVP-QP---V--CTYREL-RFSSIRLP--GC----   | 92 |
| <i>Ochotona princeps</i> LHB             | 59 | ----PSMVRVLPALP--PVP-QP---V--CTYREL-HFASIRLP--GC----   | 92 |
| <i>Canis lupus familiaris</i> LHB        | 59 | ----PSMVRVLPALP--PVP-QP---V--CTYHEL-HFASIRLP--GC----   | 92 |
| <i>Homo sapiens</i> CGB1                 | 59 | ----PTMTRVLQGVLP--ALP-QV---V--CNYRDV-RFESIRLP--GC----  | 92 |
| <i>Homo sapiens</i> CGB2                 | 59 | ----PTMTRVLQGVLP--ALP-QV---V--CNYRDV-RFESIRLP--GC----  | 92 |
| <i>Homo sapiens</i> CGB3                 | 59 | ----PTMTRVLQGVLP--ALP-QV---V--CNYRDV-RFESIRLP--GC----  | 92 |
| <i>Homo sapiens</i> CGB4                 | 59 | ----PTMTRVLQGVLP--ALP-QV---V--CNYRDV-RFESIRLP--GC----  | 92 |
| <i>Homo sapiens</i> CGB5                 | 59 | ----PTMTRVLQGVLP--ALP-QV---V--CNYRDV-RFESIRLP--GC----  | 92 |
| <i>Pan troglodytes</i> CGB1              | 59 | ----PTMTRVLQGVLP--ALP-QV---V--CNYRDV-RFESIRLP--GC----  | 92 |
| <i>Pongo abelii</i> CGB1                 | 59 | ----PTMTRVLQGVLP--ALP-QV---V--CNYRDV-RFESIRLP--GC----  | 92 |
| <i>Pongo abelii</i> CGB2                 | 59 | ----PTMTRVLQSVLP--PLP-QV---V--CTYRDV-RFEYIRLP--GC----  | 92 |
| <i>Pongo abelii</i> CGB3                 | 59 | ----PTMTRVLQSVLP--PLP-QV---V--CNYRDV-RFEYIRLP--GC----  | 92 |
| <i>Macaca mulatta</i> CGB1               | 59 | ----PTMMRVLQAVLP--PVP-QV---V--CNYREV-RFESIRLP--GC----  | 92 |

|                                    |    |                                                               |     |
|------------------------------------|----|---------------------------------------------------------------|-----|
| <i>Homo sapiens</i> GPA1           | 57 | <b>FSRAYPTPLRSKKTML-V-QK--NVTSESTCC--VAKSYN-RVT-----</b>      | 93  |
| <i>Homo sapiens</i> GPA1           | 57 | <b>FSRAYPTPLRSKKTML-V-QK--NVTSESTCC--VAKSYN-RVT-----</b>      | 93  |
| <i>Pan troglodytes</i> GPA1        | 57 | <b>FSRAYPTPLRSKKTML-V-VK--NVTSESTCC--VAKSYN-RVT-----</b>      | 93  |
| <i>Pongo abelii</i> GPA1           | 57 | <b>FSRAYPTPLRSKKTML-V-QK--NVTSESTCC--VAKSYN-RVT-----</b>      | 93  |
| <i>Nomascus leucogenys</i> GPA1    | 58 | <b>FSRAFFTPLRSKKTML-V-EK--NVTSESTCC--VAKSYN-MVT-----</b>      | 94  |
| <i>Callithrix jacchus</i> GPA1     | 61 | <b>FSRAYPTPLRSKKTML-V-PK--NVTSESTCC--VARAYT-KAT-----</b>      | 97  |
| <i>Otolemur garnettii</i> GPA1     | 61 | <b>FSRAYPTPARSKKTML-V-PK--NITSEATCC--VARAFT-KAT-----</b>      | 97  |
| <i>Mus musculus</i> GpA1           | 61 | <b>FSRAYPTPARSKKTML-V-PK--NITSEATCC--VARAFT-KAT-----</b>      | 97  |
| <i>Rattus norvegicus</i> GpA1      | 61 | <b>FSRAYPTPARSKKTML-V-PK--NITSEATCC--VARAFT-KAT-----</b>      | 97  |
| <i>Cavia porcellus</i> GPA1        | 61 | <b>FSRAYPTPARSKKTML-V-PK--NITSEASCC--VARAFT-KAT-----</b>      | 97  |
| <i>Oryctolagus cuniculus</i> GPA1  | 61 | <b>FSRAYPTPARSKKTML-V-PK--NITSEATCC--VARAFT-KAT-----</b>      | 97  |
| <i>Bos taurus</i> GPA1             | 61 | <b>FSRAYPTPARSKKTML-V-PK--NITSEATCC--VARAFT-KAT-----</b>      | 97  |
| <i>Equus caballus</i> GPA1         | 61 | <b>FSRAYPTPARSKKTML-V-PK--NITSEATCC--VARAFT-KAT-----</b>      | 97  |
| <i>Canis lupus familiaris</i> GPA1 | 61 | <b>FSRAYPTPARSKKTML-V-PK--NITSEATCC--VARAFT-KAT-----</b>      | 97  |
| <i>Myotis lucifugus</i> GPA1       | 61 | <b>FSRAYPTPARSKKTML-V-PK--NITSEATCC--VARAFT-KAT-----</b>      | 97  |
| <i>Erinaceus europaeus</i> GPA1    | 61 | <b>FSRAYPTPARSKKTML-V-PK--NITSEATCC--VARAFT-KAT-----</b>      | 97  |
| <i>Dasyurus novemcinctus</i> GPA1  | 61 | <b>FSRAYPTPARSKKTML-V-PK--NITSEATCC--VARAFT-KAT-----</b>      | 97  |
| <i>Loxodonta africana</i> GPA1     | 61 | <b>FSRAYPTPARSKKTML-V-PK--NITSEATCC--VARAFT-KAT-----</b>      | 97  |
| <i>Procavia capensis</i> GPA1      | 61 | <b>FSRAYPTPARSKKTML-V-PK--NITSEATCC--VARAFT-KAT-----</b>      | 97  |
| <i>Homo sapiens</i> GPA2           | 62 | <b>ESSAFPSRYSVLVASG-Y-RH--NITSVSCCCTISGLKRVKV-QLQ---C----</b> | 103 |
| <i>Pan troglodytes</i> GPA2        | 62 | <b>ESSAFPSRYSVLVASG-Y-RH--NITSVSCCCTISGLKRVKV-QLQ---C----</b> | 103 |
| <i>Gorilla gorilla</i> GPA2        | 62 | <b>ESSAFPSRYSVLVASG-Y-RH--NITSVSCCCTISGLKRVKV-QLQ---C----</b> | 103 |
| <i>Pongo abelii</i> GPA2           | 62 | <b>ESSAFPSRYSVLVASG-Y-RH--NITSVSCCCTISGLKRVKV-QLQ---C----</b> | 103 |
| <i>Macaca mulatta</i> GPA2         | 62 | <b>ESSAFPSRYSVLVASG-Y-RH--NITSVSCCCTISGLKRVKV-QLQ---C----</b> | 103 |
| <i>Papio hamadryas</i> GPA2        | 62 | <b>ESSAFPSRYSVLVASG-Y-RH--NITSVSCCCTISGLKRVKV-QLQ---C----</b> | 103 |
| <i>Microcebus murinus</i> GPA2     | 62 | <b>ESSAFPSRYSVLVASG-Y-RH--NITSVSCCCTISGLKRVKV-QLQ---C----</b> | 103 |
| <i>Otolemur garnettii</i> GPA2     | 62 | <b>ESSAFPSRYSVLVASG-Y-RH--NITSVSCCCTISGLKRVKV-QLQ---C----</b> | 103 |
| <i>Mus musculus</i> GpA2           | 61 | <b>ESSAFPSRYSVLVASG-Y-RH--NITSSSCCCTISSLRVVRV-WLQ---C----</b> | 102 |
| <i>Rattus norvegicus</i> GpA2      | 63 | <b>ESSAFPSRYSVLVASG-Y-RH--NITSVSCCCTISSLRVVRV-WLH---C----</b> | 104 |
| <i>Dipodomys ordii</i> GPA2        | 60 | <b>ESSAFPSRYSVLVASS-Y-QH--NITSVSCCCTISGLKRVKV-QLR---C----</b> | 101 |
| <i>Cavia porcellus</i> GPA2        | 62 | <b>ESSAFPSRYSVLVASG-Y-RH--NITSVSCCCTIHGLRVRV-QLQ---C----</b>  | 103 |
| <i>Ochotona princeps</i> GPA2      | 58 | <b>ESSAFPSRYSVLVASG-Y-RH--NITSVSCCCTISSLRVVRV-QLQ---C----</b> | 99  |
| <i>Bos taurus</i> GPA2             | 62 | <b>ESSAFPSRYSVLVASG-Y-RH--NITSVSCCCTISSLRVVRV-QLH---C----</b> | 103 |
| <i>Canis lupus familiaris</i> GPA2 | 60 | <b>ESSAFPSRYSVLVASG-Y-RH--NMTSVSCCCTISGLKRVKV-QLQ---C----</b> | 101 |
| <i>Myotis lucifugus</i> GPA2       | 62 | <b>ESSAFPSRYSVLVASG-Y-RH--NVTSTSCCCTITGLRVRV-QLQ---C----</b>  | 103 |
| <i>Loxodonta africana</i> GPA2     | 60 | <b>ESSAFPSRHSVLVASG-Y-RH--NITSVSCCCTISGLKRVKV-QLQ---C----</b> | 101 |

|                                    |     |              |            |           |              |             |     |
|------------------------------------|-----|--------------|------------|-----------|--------------|-------------|-----|
|                                    | 170 | 180          | 190        | 200       | 210          | 220         |     |
| <i>Homo sapiens</i> PREA1          | 97  | VLCKSGLGFP   | QLFTGCVLST | YTPWQQAEC | VRCPRDSNRCK  | RITPS-ACL&- | 148 |
| <i>Homo sapiens</i> PREA2          | 97  | VLCKSGLGFP   | QLFTGCVLST | YTPWQQAEC | VRCPRDSNRCK  | RITPS-ACL&- | 148 |
| <i>Homo sapiens</i> PREA3          | 97  | VLCKSGLGFP   | QLFTGCVLST | YTPWQQAEC | VRCPRDSNRCK  | RITPS-ACL&- | 148 |
| <i>Pan troglodytes</i> PREA1       | 97  | VLCKSGLGFP   | QLFTGCVLST | YTPWQQAEC | VRCPRDSNRCK  | RITPS-ACL&- | 148 |
| <i>Pongo abelii</i> PREA1          | 97  | GLYKSGLGFP   | QLFTGCVLST | YTPWQQAEC | LQCPRDSNRCK  | RITPS-ACL&- | 148 |
| <i>Nomascus leucogenys</i> PREA1   | 97  | GLYKSGLGFP   | PFTGCVLST  | YTPWQQAEC | LQCPRGSKRCK  | RITPS-ACL&- | 148 |
| <i>Homo sapiens</i> PREB           | 97  | GLYKSGLGFP   | QLFTGCVLST | YTPWQQAEC | YLRYPRDSNRCK | RITPS-ACL&- | 148 |
| <i>Pan troglodytes</i> PREB        | 97  | GLYKSGLGFP   | QLFTGCVLST | YTPWQQAEC | YLRYPRDSNRCK | RITPS-ACL&- | 148 |
| <i>Pongo abelii</i> PREB           | 95  | GLYKSGLGFP   | QLFTGCVLST | YTPWQQAEC | LYRPRESNRCK  | RITPS---L&- | 144 |
| <i>Macaca mulatta</i> PREB         | 97  | GLYKSGLGFP   | QLFTGCVLST | YTPWQQAEC | KLRCPRDSNRCK | RITPS-ACL&- | 148 |
| <i>Papio hamadryas</i> PREB        | 97  | GLYKSGLGFP   | QLFTGCVLST | YTPWQQAEC | KLRCPRDSNRCK | RITPS-ACL&- | 148 |
| <i>Homo sapiens</i> FSHB           | 85  | ---AHHA---DS | -----LYTYP | VAT-QC-HC | -----GKCDS   | SDS-T-DCT-V | 114 |
| <i>Homo sapiens</i> GPB5           | 100 | ---APGV---DP | -----FYTYP | VAI-RC-DC | -----GACSTAT | -T-ECE-T    | 129 |
| <i>Pan troglodytes</i> GPB5        | 100 | ---APGV---DP | -----FYTYP | VAI-RC-DC | -----GACSTAT | -T-ECE-T    | 129 |
| <i>Pongo abelii</i> GPB5           | 100 | ---APGV---DP | -----FYTYP | VAI-RC-DC | -----GACSTAT | -T-ECE-T    | 129 |
| <i>Macaca mulatta</i> GPB5         | 100 | ---APGV---DP | -----FYTYP | VAV-RC-DC | -----GTCSTAT | -T-ECE-T    | 129 |
| <i>Papio hamadryas</i> GPB5        | 100 | ---APGV---DP | -----FYTYP | VAV-RC-DC | -----GTCSTAT | -T-ECE-T    | 129 |
| <i>Callithrix jacchus</i> GPB5     | 100 | ---APGV---DP | -----FYTYP | VAV-RC-DC | -----GACSTAT | -T-ECE-T    | 129 |
| <i>Microcebus murinus</i> GPB5     | 101 | ---APGV---DP | -----FYTYP | VAV-RC-DC | -----GACSTAT | -T-ECE-T    | 130 |
| <i>Tupaia belangeri</i> GPB5       | 100 | ---APGV---DP | -----FYTYP | VAV-RC-DC | -----GACSTAT | -T-ECE-T    | 129 |
| <i>Mus musculus</i> GpB5           | 100 | ---APGV---DP | -----FYTYP | MAV-RC-DC | -----GACSTAT | -T-ECE-T    | 129 |
| <i>Rattus norvegicus</i> GpB5      | 99  | ---APGV---DP | -----FYTYP | MAV-RC-DC | -----GACSTAT | -T-ECE-T    | 128 |
| <i>Dipodomys ordii</i> GPB5        | 100 | ---TPGV---NP | -----FYTYP | AV-RC-EC  | -----GGCSTAT | -T-ECE-T    | 129 |
| <i>Cavia porcellus</i> GPB5        | 100 | ---APGI---DP | -----FYTYP | VAV-RC-DC | -----GACSTAT | -T-ECE-T    | 129 |
| <i>Oryctolagus cuniculus</i> GPB5  | 100 | ---APGI---DP | -----FYTYP | VAV-RC-DC | -----GACSTAT | -T-ECE-T    | 129 |
| <i>Ochotona princeps</i> GPB5      | 100 | ---VPGV---DP | -----SYTYP | VAV-RC-DC | -----GTCSTAT | -T-ECE-T    | 129 |
| <i>Tursiops truncatus</i> GPB5     | 100 | ---APGV---DP | -----FYTYP | VAV-RC-DC | -----GACSTAT | -T-ECE-T    | 129 |
| <i>Bos taurus</i> GPB5             | 100 | ---APGV---DP | -----FYTYP | VAV-RC-DC | -----GACSTAT | -T-ECE-T    | 129 |
| <i>Equus caballus</i> GPB5         | 100 | ---APGV---DP | -----FYTYP | VAV-RC-DC | -----GACSTAT | -T-ECE-T    | 129 |
| <i>Canis lupus familiaris</i> GPB5 | 100 | ---APGV---DP | -----FYTYP | VAV-RC-DC | -----GACSTAT | -T-ECE-T    | 129 |
| <i>Myotis lucifugus</i> GPB5       | 100 | ---APGV---DP | -----FYTYP | VAV-RC-DC | -----GACSTAT | -T-ECE-T    | 129 |
| <i>Erinaceus europaeus</i> GPB5    | 100 | ---APGV---DP | -----FYTYP | VAV-RC-DC | -----GACSTAT | -T-ECE-T    | 129 |
| <i>Dasyurus novemcinctus</i> GPB5  | 100 | ---APGV---DP | -----FYTYP | VAI-RC-DC | -----GACSTAT | -T-ECE-T    | 129 |
| <i>Echinops telfairi</i> GPB5      | 100 | ---APGV---DP | -----FYTYP | VAV-RC-DC | -----GACSTAT | -T-ECE-T    | 129 |
| <i>Loxodonta africana</i> GPB5     | 100 | ---APGV---DP | -----FYTYP | VAV-RC-DC | -----GACSTAT | -T-ECE-T    | 129 |
| <i>Homo sapiens</i> TSHB           | 88  | ---PLHV---AP | -----YFSYP | VAL-SC-KC | -----GKCNTDY | -S-DCI-H    | 117 |
| <i>Macaca mulatta</i> TSHB         | 88  | ---PLHV---AP | -----YFSYP | VAL-SC-KC | -----GKCNTDY | -S-DCI-H    | 117 |
| <i>Papio hamadryas</i> TSHB        | 88  | ---PLHV---AP | -----YFSYP | VAL-SC-KC | -----GKCNTDY | -S-DCI-H    | 117 |
| <i>Tarsius syrichta</i> TSHB       | 88  | ---PHHV---AP | -----YFSYP | VAV-SC-NC | -----GKCNTDY | -S-DCI-H    | 117 |
| <i>Otolemur garnettii</i> TSHB     | 88  | ---PHHV---AP | -----YFSYP | VAI-SC-KC | -----GKCNTDY | -S-DCI-H    | 117 |
| <i>Tupaia belangeri</i> TSHB       | 88  | ---PHHV---AP | -----YFSYP | VAV-SC-KC | -----GKCNTDN | -S-DCI-H    | 117 |
| <i>Mus musculus</i> Tshb           | 88  | ---PHHV---TP | -----YFSYP | VAI-SC-KC | -----GKCNTDN | -S-DCI-H    | 117 |
| <i>Rattus norvegicus</i> Tshb      | 88  | ---PHHV---AP | -----YFSYP | VAL-SC-KC | -----GKCNTDY | -S-DCT-H    | 117 |
| <i>Cavia porcellus</i> TSHB        | 88  | ---PHQV---AP | -----YFSYP | VAV-SC-KC | -----GKCNTDY | -S-DCI-H    | 117 |
| <i>Oryctolagus cuniculus</i> TSHB  | 88  | ---PHHV---TP | -----YFSYP | VAV-SC-KC | -----GKCNTDY | -S-DCI-H    | 117 |
| <i>Tursiops truncatus</i> TSHB     | 88  | ---PRHV---TP | -----YFSYP | VAI-SC-KC | -----GKCNTDY | -S-DCI-H    | 117 |
| <i>Bos taurus</i> TSHB             | 88  | ---PRHV---TP | -----YFSYP | VAI-SC-KC | -----GKCNTDY | -S-DCI-H    | 117 |
| <i>Vicugna pacos</i> TSHB          | 88  | ---PHHV---TP | -----YFSYP | VAV-SC-KC | -----GKCNTDY | -S-DCI-Q    | 117 |
| <i>Equus caballus</i> TSHB         | 88  | ---PDRV---TP | -----YFSYP | VAV-SC-KC | -----GKCNTDY | -S-DCI-H    | 117 |
| <i>Canis lupus familiaris</i> TSHB | 88  | ---PRHV---TP | -----YFSYP | VAA-SC-KC | -----GKCNTDY | -S-DCI-H    | 117 |
| <i>Myotis lucifugus</i> TSHB       | 88  | ---PRHV---SP | -----YFSYP | VAV-SC-KC | -----GKCNTDY | -S-DCV-H    | 117 |
| <i>Dasyurus novemcinctus</i> TSHB  | 88  | ---PYHV---AP | -----YFSYP | VAV-SC-KC | -----GKCNTDY | -T-DCM-H    | 117 |
| <i>Echinops telfairi</i> TSHB      | 88  | ---PDHV---AP | -----YFSYP | VAV-SC-KC | -----GKCNTDY | -S-DCI-H    | 117 |
| <i>Loxodonta africana</i> TSHB     | 88  | ---PRHV---AP | -----YFSYP | VAV-SC-RC | -----GKCNTDY | -S-DCI-Q    | 117 |
| <i>Homo sapiens</i> FSHB           | 85  | ---AHHA---DS | -----LYTYP | VAT-QC-HC | -----GKCDS   | SDS-T-DCT-V | 114 |
| <i>Pan troglodytes</i> FSHB        | 85  | ---AHHA---DS | -----LYTYP | VAT-QC-HC | -----GKCDS   | SDS-T-DCT-V | 114 |
| <i>Pongo abelii</i> FSHB           | 85  | ---AHHA---DS | -----LYTYP | VAT-QC-HC | -----GKCDS   | SDS-T-DCT-V | 114 |
| <i>Nomascus leucogenys</i> FSHB    | 85  | ---AHHA---DS | -----LHTYP | VAT-QC-HC | -----GKCDS   | SDS-T-DCT-V | 114 |
| <i>Macaca mulatta</i> FSHB         | 85  | ---AHHA---DS | -----LYTYP | VAT-QC-HC | -----GKCDS   | SDS-T-DCT-V | 114 |
| <i>Callithrix jacchus</i> FSHB     | 85  | ---AHHA---DS | -----LYTYP | VAT-QC-HC | -----GKCDS   | SDS-T-DCT-M | 114 |
| <i>Mus musculus</i> Fshb           | 86  | ---ARHS---DS | -----LYTYP | VAT-EC-HC | -----GKCDS   | SDS-T-DCT-V | 115 |
| <i>Rattus norvegicus</i> Fshb      | 86  | ---ARHS---DS | -----LYTYP | VAT-EC-HC | -----GKCDS   | SDS-T-DCT-V | 115 |
| <i>Cavia porcellus</i> FSHB        | 85  | ---AHHA---DS | -----LYTYP | VAT-EC-QC | -----GKCDS   | SDS-T-DCT-V | 114 |
| <i>Oryctolagus cuniculus</i> FSHB  | 85  | ---AHHA---DS | -----LYTYP | VAT-EC-HC | -----GKCDS   | SDS-T-DCT-V | 114 |
| <i>Ochotona princeps</i> FSHB      | 85  | ---AKQA---DS | -----LYTYP | VAT-EC-HC | -----GKCDS   | SDS-T-DCT-V | 114 |
| <i>Bos taurus</i> FSHB             | 85  | ---AHHA---DS | -----LYTYP | VAT-EC-HC | -----SKCDS   | SDS-T-DCT-V | 114 |
| <i>Vicugna pacos</i> FSHB          | 85  | ---AHHA---DS | -----LYTYP | VAT-EC-HC | -----GKCDS   | SDS-T-DCT-V | 114 |
| <i>Equus caballus</i> FSHB         | 85  | ---AHHA---DS | -----LYTYP | VAT-AC-HC | -----GKCNS   | SDS-T-DCT-V | 114 |
| <i>Canis lupus familiaris</i> FSHB | 85  | ---ARHA---DS | -----LHTYP | VAT-EC-HC | -----GKCDS   | SDS-T-DCT-V | 114 |
| <i>Myotis lucifugus</i> FSHB       | 85  | ---AHHA---DS | -----VYTYP | VAT-EC-HC | -----GKCNR   | SDS-T-DCT-V | 114 |
| <i>Pteropus vampyrus</i> FSHB      | 85  | ---AHHA---NS | -----LYAYP | VAT-EC-HC | -----GKCDS   | SDN-T-DCT-V | 114 |
| <i>Sorex araneus</i> FSHB          | 85  | ---AHHA---DS | -----LYTYP | VAT-EC-HC | -----GKCDS   | SDS-T-DCT-V | 114 |
| <i>Dasyurus novemcinctus</i> FSHB  | 85  | ---AHHT---DS | -----LYTYP | VAT-EC-HC | -----GKCDS   | SHS-T-DCT-V | 114 |

|                                          |     |     |      |      |       |          |               |      |             |       |     |
|------------------------------------------|-----|-----|------|------|-------|----------|---------------|------|-------------|-------|-----|
| <i>Choloepus hoffmanni</i> FSHB          | 85  | --- | AHRT | -DS- | ----- | -LYTYP-  | VAT-EC-HC-    | ---- | GKCDSDS-T-  | DCT-V | 114 |
| <i>Loxodonta africana</i> FSHB           | 85  | --- | AHHA | -DS- | ----- | -LYTYP-  | VAT-EC-HC-    | ---- | GKCDSDS-T-  | DCT-V | 114 |
| <i>Homo sapiens</i> LHB                  | 93  | --- | PRGV | -DP- | ----- | -VVSFP-  | VAL-SC-RC-    | ---- | GPCRST-S-   | DCG-G | 122 |
| <i>Pan troglodytes</i> LHB               | 93  | --- | PRGV | -DP- | ----- | -VVSFP-  | VAL-SC-RC-    | ---- | GPCRST-S-   | DCG-G | 122 |
| <i>Macaca mulatta</i> LHB                | 93  | --- | LPGV | -DP- | ----- | -VVSFP-  | VAL-SC-RC-    | ---- | GPCRST-S-   | DCG-G | 122 |
| <i>Mus musculus</i> LhB                  | 93  | --- | PPGV | -DP- | ----- | -IVSFP-  | VAL-SC-RC-    | ---- | GPCRST-S-   | DCG-G | 122 |
| <i>Rattus norvegicus</i> LhB             | 93  | --- | PPGV | -DP- | ----- | -IVSFP-  | VAL-SC-RC-    | ---- | GPCRST-S-   | DCG-G | 122 |
| <i>Cavia porcellus</i> LHB               | 93  | --- | PPGV | -DP- | ----- | -VVSFP-  | VAL-SC-HC-    | ---- | GTCRLSN-S-  | DCG-G | 122 |
| <i>Spermophilus tridecemlineatus</i> LHB | 93  | --- | PPGV | -DP- | ----- | -IVSFP-  | VAL-SC-HC-    | ---- | GPCRST-S-   | DCG-G | 122 |
| <i>Ochotona princeps</i> LHB             | 93  | --- | PPGV | -DP- | ----- | -MVSFP-  | VAL-SC-HC-    | ---- | GPCRST-S-   | DCG-G | 122 |
| <i>Canis lupus familiaris</i> LHB        | 93  | --- | PPGV | -DP- | ----- | -MVSFP-  | VAL-SC-RC-    | ---- | GPCRST-S-   | DCG-G | 122 |
| <i>Homo sapiens</i> CGB1                 | 93  | --- | PRGV | -NP- | ----- | -VVSFA-  | VAL-SC-QC-    | ---- | ALCRST-T-   | DCG-G | 122 |
| <i>Homo sapiens</i> CGB2                 | 93  | --- | PRGV | -NP- | ----- | -VVSFA-  | VAL-SC-QC-    | ---- | ALCRST-T-   | DCG-G | 122 |
| <i>Homo sapiens</i> CGB3                 | 93  | --- | PRGV | -NP- | ----- | -VVSFA-  | VAL-SC-QC-    | ---- | ALCRST-T-   | DCG-G | 122 |
| <i>Homo sapiens</i> CGB4                 | 93  | --- | PRGV | -NP- | ----- | -VVSFA-  | VAL-SC-QC-    | ---- | ALCRST-T-   | DCG-G | 122 |
| <i>Homo sapiens</i> CGB5                 | 93  | --- | PRGV | -NP- | ----- | -VVSFA-  | VAL-SC-QC-    | ---- | ALCRST-T-   | DCG-G | 122 |
| <i>Pan troglodytes</i> CGB1              | 93  | --- | PRGV | -NP- | ----- | -VVSFA-  | VAL-SC-QC-    | ---- | ALCRST-T-   | DCG-G | 122 |
| <i>Pongo abelii</i> CGB1                 | 93  | --- | PRGV | -NP- | ----- | -VVSFA-  | VAL-SC-QC-    | ---- | ALCRST-T-   | DCG-G | 122 |
| <i>Pongo abelii</i> CGB2                 | 93  | --- | PRGV | -NP- | ----- | -VVSFA-  | VAL-SC-QC-    | ---- | ALCRST-T-   | DCG-G | 122 |
| <i>Pongo abelii</i> CGB3                 | 93  | --- | PRGV | -NP- | ----- | -VVSFA-  | VAL-SC-QC-    | ---- | ALCRST-T-   | DCG-G | 122 |
| <i>Macaca mulatta</i> CGB1               | 93  | --- | PPGV | -DP- | ----- | -VVSFA-  | VAL-SC-RC-    | ---- | ALCRST-S-   | DCG-G | 122 |
|                                          |     |     |      |      |       |          |               |      |             |       |     |
| <i>Homo sapiens</i> GPA1                 | 94  | --- | VMGG | -FK- | ----- | -VE-NHT- | -AC-HC-       | ---- | STCYHK-S&-  | ----  | 116 |
| <i>Homo sapiens</i> GPA1                 | 94  | --- | VMGG | -FK- | ----- | -VE-NHT- | -AC-HC-       | ---- | STCYHK-S&-  | ----  | 116 |
| <i>Pan troglodytes</i> GPA1              | 94  | --- | VMGG | -FK- | ----- | -VE-NHT- | -AC-HC-       | ---- | STCYHK-S&-  | ----  | 116 |
| <i>Pongo abelii</i> GPA1                 | 94  | --- | VMGN | -FK- | ----- | -VE-NHT- | -AC-HC-       | ---- | STCYHK-S&-  | ----  | 116 |
| <i>Nomascus leucogenys</i> GPA1          | 95  | --- | VMGS | -LR- | ----- | -VE-NHT- | -AC-HC-       | ---- | STCYHK-S&-  | ----  | 117 |
| <i>Callithrix jacchus</i> GPA1           | 98  | --- | VMGN | -IR- | ----- | -VE-NHT- | -EC-HC-       | ---- | STCYHK-S&-  | ----  | 120 |
| <i>Otolemur garnettii</i> GPA1           | 98  | --- | VMGN | -AK- | ----- | -VE-NHT- | -DC-HC-       | ---- | STCYHK-S&-  | ----  | 120 |
| <i>Mus musculus</i> GPA1                 | 98  | --- | VMGN | -AR- | ----- | -VE-NHT- | -EC-HC-       | ---- | STCYHK-S&-  | ----  | 120 |
| <i>Rattus norvegicus</i> GPA1            | 98  | --- | VMGN | -AR- | ----- | -VE-NHT- | -DC-HC-       | ---- | STCYHK-S&-  | ----  | 120 |
| <i>Cavia porcellus</i> GPA1              | 98  | --- | VKGN | -VR- | ----- | -VE-NHT- | -EC-HC-       | ---- | STCYHK-S&-  | ----  | 120 |
| <i>Oryctolagus cuniculus</i> GPA1        | 98  | --- | VMGN | -AK- | ----- | -VE-NHT- | -EC-HC-       | ---- | STCYHK-S&-  | ----  | 120 |
| <i>Bos taurus</i> GPA1                   | 98  | --- | VMGN | -VR- | ----- | -VE-NHT- | -EC-HC-       | ---- | STCYHK-S&-  | ----  | 120 |
| <i>Equus caballus</i> GPA1               | 98  | --- | VMGN | -IK- | ----- | -LE-NHT- | -QC-YC-       | ---- | STCYHK-S&-  | ----  | 120 |
| <i>Canis lupus familiaris</i> GPA1       | 98  | --- | VMGN | -AK- | ----- | -VE-NHT- | -EC-HC-       | ---- | STCYHK-S&-  | ----  | 120 |
| <i>Myotis lucifugus</i> GPA1             | 98  | --- | VMGN | -VK- | ----- | -VE-NHT- | -EC-HC-       | ---- | STCYHK-S&-  | ----  | 120 |
| <i>Erinaceus europaeus</i> GPA1          | 98  | --- | VMGN | -AR- | ----- | -VE-NHT- | -EC-HC-       | ---- | STCYHK-S&-  | ----  | 120 |
| <i>Dasyurus novemcinctus</i> GPA1        | 98  | --- | VMGN | -AK- | ----- | -VE-NHT- | -EC-HC-       | ---- | STCYHK-S&-  | ----  | 120 |
| <i>Loxodonta africana</i> GPA1           | 98  | --- | VMGN | -AK- | ----- | -VE-NHT- | -EC-HC-       | ---- | STCYHK-S&-  | ----  | 120 |
| <i>Procavia capensis</i> GPA1            | 98  | --- | VMGN | -AK- | ----- | -VE-NHT- | -EC-HC-       | ---- | STCYHK-S&-  | ----  | 120 |
| <i>Homo sapiens</i> GPA2                 | 104 | --- | V-GS | -RR- | ----- | -EELE-   | -IFTAR-AC-QC- | ---- | DMCRLSR-Y&- | ----  | 129 |
| <i>Pan troglodytes</i> GPA2              | 104 | --- | V-GS | -RR- | ----- | -EELE-   | -IFTAR-AC-QC- | ---- | DMCRLSR-Y&- | ----  | 129 |
| <i>Gorilla gorilla</i> GPA2              | 104 | --- | V-GS | -RR- | ----- | -EELE-   | -IFTAR-AC-QC- | ---- | DMCRLSR-Y&- | ----  | 129 |
| <i>Pongo abelii</i> GPA2                 | 104 | --- | V-GS | -RR- | ----- | -EELE-   | -IFTAR-AC-QC- | ---- | DMCRLSR-Y&- | ----  | 129 |
| <i>Macaca mulatta</i> GPA2               | 104 | --- | V-GS | -RR- | ----- | -EELE-   | -IFTAR-AC-QC- | ---- | DMCRLSR-Y&- | ----  | 129 |
| <i>Papio hamadryas</i> GPA2              | 104 | --- | V-GS | -RR- | ----- | -EELE-   | -IFTAR-AC-QC- | ---- | DMCRLSR-Y&- | ----  | 129 |
| <i>Microcebus murinus</i> GPA2           | 104 | --- | V-GN | -RR- | ----- | -EELE-   | -IFTAR-AC-QC- | ---- | DMCRLSR-Y&- | ----  | 129 |
| <i>Otolemur garnettii</i> GPA2           | 104 | --- | V-GK | -RR- | ----- | -EELE-   | -IFTAR-AC-QC- | ---- | DMCRLSR-Y&- | ----  | 129 |
| <i>Mus musculus</i> GPA2                 | 103 | --- | V-GN | -QR- | ----- | -GELE-   | -IFTAR-AC-QC- | ---- | DMCRLSR-Y&- | ----  | 128 |
| <i>Rattus norvegicus</i> GPA2            | 105 | --- | V-GN | -QR- | ----- | -GELE-   | -IFTAR-AC-QC- | ---- | DMCRLSR-Y&- | ----  | 130 |
| <i>Dipodomys ordii</i> GPA2              | 102 | --- | A-GN | -RQ- | ----- | -GELE-   | -IFTAR-AC-QC- | ---- | DMCRLSR-Y&- | ----  | 127 |
| <i>Cavia porcellus</i> GPA2              | 104 | --- | T-GS | -QS- | ----- | -GELE-   | -IFTAR-AC-RC- | ---- | DMCRLSR-I&- | ----  | 129 |
| <i>Ochotona princeps</i> GPA2            | 100 | --- | G-GT | -RR- | ----- | -EELE-   | -FYTAR-AC-QC- | ---- | DMCRLSR-Y&- | ----  | 125 |
| <i>Bos taurus</i> GPA2                   | 104 | --- | G-GN | -RK- | ----- | -EELE-   | -IFTAR-AC-QC- | ---- | DMCRLSR-Y&- | ----  | 129 |
| <i>Canis lupus familiaris</i> GPA2       | 102 | --- | G-GD | -QK- | ----- | -EELE-   | -IFTAR-AC-QC- | ---- | DMCRLSR-Y&- | ----  | 127 |
| <i>Myotis lucifugus</i> GPA2             | 104 | --- | G-GG | -RR- | ----- | -EELE-   | -IFTAR-AC-QC- | ---- | DMCRLSR-Y&- | ----  | 129 |
| <i>Loxodonta africana</i> GPA2           | 102 | --- | A-GG | -QQ- | ----- | -EGLE-   | -IFTAR-AC-QC- | ---- | DMCRLSR-Y&- | ----  | 127 |



|                                    | 230 | 240                        | 250   | 260   |     |
|------------------------------------|-----|----------------------------|-------|-------|-----|
| <i>Homo sapiens</i> PREA1          | -   | -----                      | ----- | ----- | -   |
| <i>Homo sapiens</i> PREA2          | -   | -----                      | ----- | ----- | -   |
| <i>Homo sapiens</i> PREA3          | -   | -----                      | ----- | ----- | -   |
| <i>Pan troglodytes</i> PREA1       | -   | -----                      | ----- | ----- | -   |
| <i>Pongo abelii</i> PREA1          | -   | -----                      | ----- | ----- | -   |
| <i>Nomascus leucogenys</i> PREA1   | -   | -----                      | ----- | ----- | -   |
| <i>Homo sapiens</i> PREB           | -   | -----                      | ----- | ----- | -   |
| <i>Pan troglodytes</i> PREB        | -   | -----                      | ----- | ----- | -   |
| <i>Pongo abelii</i> PREB           | -   | -----                      | ----- | ----- | -   |
| <i>Macaca mulatta</i> PREB         | -   | -----                      | ----- | ----- | -   |
| <i>Papio hamadryas</i> PREB        | -   | -----                      | ----- | ----- | -   |
|                                    |     |                            |       |       |     |
| <i>Homo sapiens</i> FSHB           | 115 | R-GLGPSYCSFGEMKE&          | ----- | ----- | 129 |
| <i>Homo sapiens</i> GPB5           | 130 | I&                         | ----- | ----- | 130 |
| <i>Pan troglodytes</i> GPB5        | 130 | I&                         | ----- | ----- | 130 |
| <i>Pongo abelii</i> GPB5           | 130 | I&                         | ----- | ----- | 130 |
| <i>Macaca mulatta</i> GPB5         | 130 | I&                         | ----- | ----- | 130 |
| <i>Papio hamadryas</i> GPB5        | 130 | I&                         | ----- | ----- | 130 |
| <i>Callithrix jacchus</i> GPB5     | 130 | I&                         | ----- | ----- | 130 |
| <i>Microcebus murinus</i> GPB5     | 131 | I&                         | ----- | ----- | 131 |
| <i>Tupaia belangeri</i> GPB5       | 130 | I&                         | ----- | ----- | 130 |
| <i>Mus musculus</i> GpB5           | 130 | I&                         | ----- | ----- | 130 |
| <i>Rattus norvegicus</i> GpB5      | 129 | I&                         | ----- | ----- | 129 |
| <i>Dipodomys ordii</i> GPB5        | 130 | M&                         | ----- | ----- | 130 |
| <i>Cavia porcellus</i> GPB5        | 130 | M&                         | ----- | ----- | 130 |
| <i>Oryctolagus cuniculus</i> GPB5  | 130 | M&                         | ----- | ----- | 130 |
| <i>Ochotona princeps</i> GPB5      | 130 | F&                         | ----- | ----- | 130 |
| <i>Tursiops truncatus</i> GPB5     | 130 | I&                         | ----- | ----- | 130 |
| <i>Bos taurus</i> GPB5             | 130 | I&                         | ----- | ----- | 130 |
| <i>Equus caballus</i> GPB5         | 130 | I&                         | ----- | ----- | 130 |
| <i>Canis lupus familiaris</i> GPB5 | 130 | I&                         | ----- | ----- | 130 |
| <i>Myotis lucifugus</i> GPB5       | 130 | I&                         | ----- | ----- | 130 |
| <i>Erinaceus europaeus</i> GPB5    | 130 | I&                         | ----- | ----- | 130 |
| <i>Dasyopus novemcinctus</i> GPB5  | 130 | I&                         | ----- | ----- | 130 |
| <i>Echinops telfairi</i> GPB5      | 130 | I&                         | ----- | ----- | 130 |
| <i>Loxodonta africana</i> GPB5     | 130 | I&                         | ----- | ----- | 130 |
| <i>Homo sapiens</i> TSHB           | 118 | E-AIKTNYCTKPQKSY-LVGF-SV&  | ----- | ----- | 138 |
| <i>Macaca mulatta</i> TSHB         | 118 | E-AIKTNYCTKPQKSY-LVGF-SV&  | ----- | ----- | 138 |
| <i>Papio hamadryas</i> TSHB        | 118 | E-AIKTNYCTKPQKSY-LVGF-SV&  | ----- | ----- | 138 |
| <i>Tarsius syrichta</i> TSHB       | 118 | E-AIKTNYCTKPQKPY-GVGF-SV&  | ----- | ----- | 138 |
| <i>Otolemur garnettii</i> TSHB     | 118 | E-AVKTNYCTKPQKSY-LVGF-SV&  | ----- | ----- | 138 |
| <i>Tupaia belangeri</i> TSHB       | 118 | E-AIKTNYCTKPQKSY-LVGF-SV&  | ----- | ----- | 138 |
| <i>Mus musculus</i> Tshb           | 118 | E-AVRTNYCTKPKQSFY-LGGF-SV& | ----- | ----- | 138 |
| <i>Rattus norvegicus</i> Tshb      | 118 | E-AVKTNYCTKPKQTFY-LGGF-SG& | ----- | ----- | 138 |
| <i>Cavia porcellus</i> TSHB        | 118 | E-ATETNYCTKPEMSY-LMGF-SV&  | ----- | ----- | 138 |
| <i>Oryctolagus cuniculus</i> TSHB  | 118 | E-TIKTNYCTKPQKSY-LVGF-SV&  | ----- | ----- | 138 |
| <i>Tursiops truncatus</i> TSHB     | 118 | E-AIKTNYCTKPQKSY-VVGF-SI&  | ----- | ----- | 138 |
| <i>Bos taurus</i> TSHB             | 118 | E-AIKTNYCTKPQKSY-MVGF-SI&  | ----- | ----- | 138 |
| <i>Vicugna pacos</i> TSHB          | 118 | E-AVKMNYCTKPKQPH-VVGL-SI&  | ----- | ----- | 138 |
| <i>Equus caballus</i> TSHB         | 118 | E-AIKANYCTKPQKSY-VVEF-SI&  | ----- | ----- | 138 |
| <i>Canis lupus familiaris</i> TSHB | 118 | E-AIKTNYCTKPQKSY-VVGF-SI&  | ----- | ----- | 138 |
| <i>Myotis lucifugus</i> TSHB       | 118 | E-ITKTNYCTKPKQSY-LVGV-SI&  | ----- | ----- | 138 |
| <i>Dasyopus novemcinctus</i> TSHB  | 118 | E-ASKTNYCSKPKQSY-VRGF-SV&  | ----- | ----- | 138 |
| <i>Echinops telfairi</i> TSHB      | 118 | E-AIKTNYCTKPQKSY-MMGF-SV&  | ----- | ----- | 138 |
| <i>Loxodonta africana</i> TSHB     | 118 | E-AIKTDYCTKPQKSY-AVGF-SV&  | ----- | ----- | 138 |
| <i>Homo sapiens</i> FSHB           | 115 | R-GLGPSYCSFGEMKE&          | ----- | ----- | 129 |
| <i>Pan troglodytes</i> FSHB        | 115 | R-GLGPSYCSFGEMKE&          | ----- | ----- | 129 |
| <i>Pongo abelii</i> FSHB           | 115 | R-GLGPSYCSFGEMKE&          | ----- | ----- | 129 |
| <i>Nomascus leucogenys</i> FSHB    | 115 | R-GLGPSYCSFGEMKE&          | ----- | ----- | 129 |
| <i>Macaca mulatta</i> FSHB         | 115 | R-GLGPSYCSFSEMKE&          | ----- | ----- | 129 |
| <i>Callithrix jacchus</i> FSHB     | 115 | Q-GLGPDYCSFSEMKE&          | ----- | ----- | 129 |
| <i>Mus musculus</i> Fshb           | 116 | R-GLGPSYCSFSEMKE&          | ----- | ----- | 130 |
| <i>Rattus norvegicus</i> Fshb      | 116 | R-GLGPSYCSFGEMKE&          | ----- | ----- | 130 |
| <i>Cavia porcellus</i> FSHB        | 115 | R-GLGPSYCSFSEIKE&          | ----- | ----- | 129 |
| <i>Oryctolagus cuniculus</i> FSHB  | 115 | R-GLGPSYCSFGEMKE&          | ----- | ----- | 129 |
| <i>Ochotona princeps</i> FSHB      | 115 | R-GLGPSYCSFSEMKE&          | ----- | ----- | 129 |
| <i>Bos taurus</i> FSHB             | 115 | R-GLGPSYCSFREIKE&          | ----- | ----- | 129 |
| <i>Vicugna pacos</i> FSHB          | 115 | R-GLGPSYCSFSEMKE&          | ----- | ----- | 129 |
| <i>Equus caballus</i> FSHB         | 115 | R-GLGPSYCSFGDMKE&          | ----- | ----- | 129 |
| <i>Canis lupus familiaris</i> FSHB | 115 | R-GLGPGYCSFGEFQQ&          | ----- | ----- | 129 |
| <i>Myotis lucifugus</i> FSHB       | 115 | Q-GLGPSYCSFSEIKE&          | ----- | ----- | 129 |
| <i>Pteropus vampyrus</i> FSHB      | 115 | R-GLGPSYCSFSEMKE&          | ----- | ----- | 129 |
| <i>Sorex araneus</i> FSHB          | 115 | R-GLGPNYCSFGELKE&          | ----- | ----- | 129 |
| <i>Dasyopus novemcinctus</i> FSHB  | 115 | R-GLGPSYCSFSEMKE&          | ----- | ----- | 129 |

|                                          |     |                                                  |     |
|------------------------------------------|-----|--------------------------------------------------|-----|
| <i>Choloepus hoffmanni</i> FSHB          | 115 | R-GLGPSYCSFSEMKE&-----                           | 129 |
| <i>Loxodonta africana</i> FSHB           | 115 | R-GLGPSYCSFSEMKE&-----                           | 129 |
| <i>Homo sapiens</i> LHB                  | 123 | P-KDHPLTCDHPQLSG-LLFL&-----                      | 141 |
| <i>Pan troglodytes</i> LHB               | 123 | P-KDHPLTCDHPQLSG-LLFL&-----                      | 141 |
| <i>Macaca mulatta</i> LHB                | 123 | P-KDHPLTCDHPQLPG-LLFL&-----                      | 141 |
| <i>Mus musculus</i> LhB                  | 123 | P-RTQPMACDLPHLPG-LLLL&-----                      | 141 |
| <i>Rattus norvegicus</i> LhB             | 123 | P-RTQPMTCDLPHLPG-LLLL&-----                      | 141 |
| <i>Cavia porcellus</i> LHB               | 123 | L-RGQPSACELPHLPG-FFFL&-----                      | 141 |
| <i>Spermophilus tridecemlineatus</i> LHB | 123 | P-RAQPLACDLPLPG-LLFL&-----                       | 141 |
| <i>Ochotona princeps</i> LHB             | 123 | P-RAHPLTCELPHLPG-LFFL&-----                      | 141 |
| <i>Canis lupus familiaris</i> LHB        | 123 | P-RAQSLACDRPLLPG-LLFL&-----                      | 141 |
| <i>Homo sapiens</i> CGB1                 | 123 | P-KDHPLTCDPRFQA-SSSS-KA-PPPSLPSPSRLPGP-SDTPILPQ& | 165 |
| <i>Homo sapiens</i> CGB2                 | 123 | P-KDHPLTCDPRFQD-SSSS-KA-PPPSLPSPSRLPGP&-----     | 157 |
| <i>Homo sapiens</i> CGB3                 | 123 | P-KDHPLTCDPRFQD-SSSS-KA-PPPSLPSPSRLPGP-SDTPILPQ& | 165 |
| <i>Homo sapiens</i> CGB4                 | 123 | P-KDHPLTCDPRFQD-SSSS-KA-PPPSLPSPSRLPGP-SDTPILPQ& | 165 |
| <i>Homo sapiens</i> CGB5                 | 123 | P-KDHPLTCDPRFQA-SSSS-KA-PPPSLPSPSRLPGP-SDTPILPQ& | 165 |
| <i>Pan troglodytes</i> CGB1              | 123 | P-KDHPLTCDPRFQA-SSSS-KA-PPPSLPSPSRLPGP-SDTPILPQ& | 165 |
| <i>Pongo abelii</i> CGB1                 | 123 | P-KDHPLTCDPRFQD-PSSS-KA-PPPSLPSPSRLPEP-SGTPFLPQ& | 165 |
| <i>Pongo abelii</i> CGB2                 | 123 | P-KDHPLTCDPRFQD-PSSS-KA-PPPSLPSPSRLPEP-SGTPFLPQ& | 165 |
| <i>Pongo abelii</i> CGB3                 | 123 | P-KDHPLTCDPRFQD-PSSS-KA-PPPSLPSPSRLPEP-SDTPFLPQ& | 165 |
| <i>Macaca mulatta</i> CGB1               | 123 | P-KDHPLTCDPHLQA-SSSS-KD-PPPSFPSPSGLLEP-ADNPFLPQ& | 165 |
| <i>Homo sapiens</i> GPA1                 | -   | -----                                            | -   |
| <i>Homo sapiens</i> GPA1                 | -   | -----                                            | -   |
| <i>Homo sapiens</i> GPA1                 | -   | -----                                            | -   |
| <i>Pan troglodytes</i> GPA1              | -   | -----                                            | -   |
| <i>Pongo abelii</i> GPA1                 | -   | -----                                            | -   |
| <i>Nomascus leucogenys</i> GPA1          | -   | -----                                            | -   |
| <i>Callithrix jacchus</i> GPA1           | -   | -----                                            | -   |
| <i>Otolemur garnettii</i> GPA1           | -   | -----                                            | -   |
| <i>Mus musculus</i> GpA1                 | -   | -----                                            | -   |
| <i>Rattus norvegicus</i> GpA1            | -   | -----                                            | -   |
| <i>Cavia porcellus</i> GPA1              | -   | -----                                            | -   |
| <i>Oryctolagus cuniculus</i> GPA1        | -   | -----                                            | -   |
| <i>Bos taurus</i> GPA1                   | -   | -----                                            | -   |
| <i>Equus caballus</i> GPA1               | -   | -----                                            | -   |
| <i>Canis lupus familiaris</i> GPA1       | -   | -----                                            | -   |
| <i>Myotis lucifugus</i> GPA1             | -   | -----                                            | -   |
| <i>Erinaceus europaeus</i> GPA1          | -   | -----                                            | -   |
| <i>Dasyopus novemcinctus</i> GPA1        | -   | -----                                            | -   |
| <i>Loxodonta africana</i> GPA1           | -   | -----                                            | -   |
| <i>Procavia capensis</i> GPA1            | -   | -----                                            | -   |
| <i>Homo sapiens</i> GPA2                 | -   | -----                                            | -   |
| <i>Pan troglodytes</i> GPA2              | -   | -----                                            | -   |
| <i>Gorilla gorilla</i> GPA2              | -   | -----                                            | -   |
| <i>Pongo abelii</i> GPA2                 | -   | -----                                            | -   |
| <i>Macaca mulatta</i> GPA2               | -   | -----                                            | -   |
| <i>Papio hamadryas</i> GPA2              | -   | -----                                            | -   |
| <i>Microcebus murinus</i> GPA2           | -   | -----                                            | -   |
| <i>Otolemur garnettii</i> GPA2           | -   | -----                                            | -   |
| <i>Mus musculus</i> GpA2                 | -   | -----                                            | -   |
| <i>Rattus norvegicus</i> GpA2            | -   | -----                                            | -   |
| <i>Dipodomys ordii</i> GPA2              | -   | -----                                            | -   |
| <i>Cavia porcellus</i> GPA2              | -   | -----                                            | -   |
| <i>Ochotona princeps</i> GPA2            | -   | -----                                            | -   |
| <i>Bos taurus</i> GPA2                   | -   | -----                                            | -   |
| <i>Canis lupus familiaris</i> GPA2       | -   | -----                                            | -   |
| <i>Myotis lucifugus</i> GPA2             | -   | -----                                            | -   |
| <i>Loxodonta africana</i> GPA2           | -   | -----                                            | -   |
