# Supplementary material for: Initial description of primate-specific cystine-knot Prometheus genes and differential gene expansions of D-dopachrome tautomerase genes
Source: PubMed Central journal article supplement — Meta Gene. 2015 Apr 25;4:118–28. doi: 10.1016/j.mgene.2015.02.005 (PMC4412970; doi:10.1016/j.mgene.2015.02.005), 2015-04-25
Supplement: mmc11.pdf [file mmc11.pdf]

**Supplementary data file 8:** Gene data set of eutherian D-dopachrome tautomerase and macrophage migration inhibitory factor genes.

| Superordinal clade | Order    | Species <sup>a</sup> | Genome assembly <sup>b</sup> | Gene number | Gene        | Genomic coordinates <sup>c</sup>                                                                                     | GenBank ID |
|--------------------|----------|----------------------|------------------------------|-------------|-------------|----------------------------------------------------------------------------------------------------------------------|------------|
| Euarchontoglires   | Primates | Human                | GRCh37 (>7)                  | 5           | <i>DDT1</i> | exon 1: ch.22: 24316496-24316603 bp<br>exon 2: ch.22: 24315957-24316132 bp<br>exon 3: ch.22: 24313740-24313812 bp    | HF564786   |
|                    |          |                      |                              |             | <i>DDT2</i> | exon 1: ch.22: 24309103-24309210 bp<br>exon 2: ch.22: 24309574-24309749 bp<br>exon 3: ch.22: 24313475-24313595 bp    | HF564787   |
|                    |          |                      |                              |             | <i>DDT3</i> | exon 1: ch.22: 24373138-24373245 bp<br>exon 2: ch.22: 24373610-24373873 bp                                           | HF564788   |
|                    |          |                      |                              |             | <i>DDT4</i> | exon 1: ch.3: 38557217-38557321 bp<br>exon 2: ch.3: 38556936-38557181 bp                                             | HF564789   |
|                    |          |                      |                              |             | <i>MIF</i>  | exon 1: ch.22: 24236662-24236769 bp<br>exon 2: ch.22: 24236959-24237131 bp<br>exon 3: ch.22: 24237227-24237293 bp    | HF564790   |
|                    |          | Common chimpanzee    | CHIMP2.1.4 (6)               | 3           | <i>DDT1</i> | exon 1: ch.22: 22434079-22434186 bp<br>exon 2: ch.22: 22434550-22434725 bp<br>exon 3: ch.22: 22436874-22436946 bp    | HF564791   |
|                    |          |                      |                              |             | <i>DDT3</i> | exon 1: ch.22: 22488817-22488924 bp<br>exon 2: ch.22: 22489289-22489552 bp                                           | HF564792   |
|                    |          |                      |                              |             | <i>DDT4</i> | exon 1: ch.3: 39100637-39100741 bp<br>exon 2: ch.3: 39100356-39100601 bp                                             | HF564793   |
|                    |          | Western gorilla      | gorGor3.1 (2.1)              | 0           | putative    | exon 1: ch.22: 7877634-7877741 bp<br>exon 2: ch.22: 7877095-7877270 bp<br>exon 3: ch.22: 7874892-7874964 bp          | -          |
|                    |          |                      |                              |             | putative    | exon 1: ch.3: 39630299-39630403 bp<br>exon 2: ch.3: 39630018-39630263 bp                                             | -          |
|                    |          | Sumatran orangutan   | P_pygmaeus_2.0.2 (6)         | 1           | <i>DDT2</i> | exon 1: NW_002973107.1: 2712-2819 bp<br>exon 2: NW_002973107.1: 3184-3359 bp<br>exon 3: NW_002973107.1: 7140-7260 bp | HF564794   |
|                    |          |                      |                              |             | putative    | exon 1: ch.22: 18835908-18836015 bp<br>exon 2: ch.22: 18836205-18836377 bp                                           | -          |

|  |                               |                      |                |             |                                                                                                                                                             |                                                                                                                   |          |
|--|-------------------------------|----------------------|----------------|-------------|-------------------------------------------------------------------------------------------------------------------------------------------------------------|-------------------------------------------------------------------------------------------------------------------|----------|
|  |                               |                      |                |             | exon 3: ch.22: 18836489-18836555 bp                                                                                                                         |                                                                                                                   |          |
|  | Northern white-cheeked gibbon | Nleu1.1 (5.6)        | 2              | <i>DDT4</i> | exon 1: GL397269.1: 27011710-27011814 bp<br>exon 2: GL397269.1: 27011429-27011674 bp                                                                        | HF564795                                                                                                          |          |
|  |                               |                      |                | <i>MIF</i>  | exon 1: GL397571.1: 232324-232431 bp<br>exon 2: GL397571.1: 232621-232793 bp<br>exon 3: GL397571.1: 232889-232955 bp                                        | HF564796                                                                                                          |          |
|  | Rhesus monkey                 | Mmul_051212 (5.3)    | 0              | putative    | exon 1: NW_001096040.1: 297858-297965 bp<br>exon 2: NW_001096040.1: 298155-298327 bp<br>exon 3: NW_001096040.1: 298423-298489 bp                            | -                                                                                                                 |          |
|  | Hamadryas baboon              | Pham_1.0 (5.3)       | 2              | <i>DDT1</i> | exon 1: Contig385965_Contig130188: 48615-48722 bp<br>exon 2: Contig385965_Contig130188: 48092-48267 bp<br>exon 3: Contig385965_Contig130188: 45840-45912 bp | HF564797                                                                                                          |          |
|  |                               |                      |                | <i>MIF</i>  | exon 1: Contig562299_Contig129652: 43938-44045 bp<br>exon 2: Contig562299_Contig129652: 43575-43748 bp<br>exon 3: Contig562299_Contig129652: 43399-43465 bp | HF564798                                                                                                          |          |
|  | Common marmoset               | C_jacchus3.2.1 (6.6) | 1              | <i>DDT1</i> | exon 1: ch.1: 187585831-187585938 bp<br>exon 2: ch.1: 187585294-187585469 bp<br>exon 3: ch.1: 187583134-187583206 bp                                        | HF564799                                                                                                          |          |
|  | Philippine tarsier            | tarSyr1.0 (1.82)     | 0              | putative    | exon 1: scaffold_130591: 2825-2932 bp<br>exon 2: scaffold_130591: 2310-2485 bp<br>exon 3: scaffold_130591: 382-454 bp                                       | -                                                                                                                 |          |
|  | Northern greater galago       | otoGar3 (3.89)       | 1              | <i>MIF</i>  | exon 1: AAQR03184673.1: 6147-6254 bp<br>exon 2: AAQR03184673.1: 6451-6623 bp<br>exon 3: AAQR03184673.1: 6707-6773 bp                                        | HF564800                                                                                                          |          |
|  |                               |                      |                | putative    | exon 1: AAQR03184689.1: 10440-10547 bp<br>exon 2: AAQR03184689.1: 10870-11045 bp<br>exon 3: AAQR03184689.1: 12993-13065 bp                                  | -                                                                                                                 |          |
|  | Scadentia                     | Northern treeshrew   | tupBell (1.89) | 1           | <i>DDT1</i>                                                                                                                                                 | exon 1: scaffold_8737: 3969-4076 bp<br>exon 2: scaffold_8737: 3464-3639 bp<br>exon 3: scaffold_8737: 956-1028 bp  | HF564801 |
|  | Rodentia                      | Mouse                | GRCm38 (>7)    | 2           | <i>Ddt</i>                                                                                                                                                  | exon 1: ch.10: 75773216-75773323 bp<br>exon 2: ch.10: 75772738-75772913 bp<br>exon 3: ch.10: 75771434-75771506 bp | HF564802 |
|  |                               |                      |                | <i>Mif</i>  | exon 1: ch.10: 75860061-75860168 bp<br>exon 2: ch.10: 75859687-75859859 bp                                                                                  | HF564803                                                                                                          |          |

|                |                |                                |                  |   |            |                                                                                                                            |          |
|----------------|----------------|--------------------------------|------------------|---|------------|----------------------------------------------------------------------------------------------------------------------------|----------|
|                |                |                                |                  |   |            | exon 3: ch.10: 75859477-75859543 bp                                                                                        |          |
|                |                | Brown rat                      | Rnor_5.0 (>7)    | 2 | <i>Ddt</i> | exon 1: ch.20: 16016910-16017017 bp<br>exon 2: ch.20: 16017322-16017497 bp<br>exon 3: ch.20: 16019056-16019128 bp          | HF564804 |
|                |                |                                |                  |   | <i>Mif</i> | exon 1: ch.20: 15885332-15885439 bp<br>exon 2: ch.20: 15885632-15885804 bp<br>exon 3: ch.20: 15885927-15885993 bp          | HF564805 |
|                |                | Ord's kangaroo rat             | dipOrd1 (1.85)   | 0 | putative   | exon 1: scaffold_1047: 15358-15465 bp<br>exon 2: scaffold_1047: 14881-15056 bp<br>exon 3: scaffold_1047: 12195-12267 bp    | -        |
|                |                | Domesticated guinea pig        | cavPor3 (6.76)   | 0 | putative   | exon 1: scaffold_4: 8291720-8291827 bp<br>exon 2: scaffold_4: 8291997-8292169 bp<br>exon 3: scaffold_4: 8292301-8292367 bp | -        |
|                |                | Thirteen-lined ground squirrel | speTri1 (1.9)    | 0 | putative   | exon 1: JH393429.1: 1044856-1044963 bp<br>exon 2: JH393429.1: 1044345-1044520 bp<br>exon 3: JH393429.1: 1043188-1043260 bp | -        |
|                | Lagomorpha     | European rabbit                | oryCun2 (6.55)   | 0 | putative   | exon 1: GL018810.1: 883222-883329 bp<br>exon 2: GL018810.1: 882793-882968 bp<br>exon 3: GL018810.1: 881759-881831 bp       | -        |
| Laurasiatheria | Artiodactyla   | Domestic cattle                | Btau_4.6.1 (>7)  | 2 | <i>DDT</i> | exon 1: ch.17: 74396707-74396814 bp<br>exon 2: ch.17: 74397173-74397348 bp<br>exon 3: ch.17: 74399112-74399184 bp          | HF564806 |
|                |                |                                |                  |   | <i>MIF</i> | exon 1: ch.17: 74353811-74353918 bp<br>exon 2: ch.17: 74354058-74354230 bp<br>exon 3: ch.17: 74354313-74354380 bp          | HF564807 |
|                |                | Wild boar                      | Sscrofa10.2 (4)  | 0 | putative   | exon 1: ch.14: 53235266-53235373 bp<br>exon 2: ch.14: 53234792-53234967 bp<br>exon 3: ch.14: 53233178-53233250 bp          | -        |
|                |                |                                |                  |   | putative   | exon 1: ch.14: 53283160-53283267 bp<br>exon 2: ch.14: 53282820-53282992 bp<br>exon 3: ch.14: 53282671-53282737 bp          | -        |
|                |                | Vicugna                        | vicPac1.0 (2.51) | 0 | putative   | exon 1: TI2045130565: 214-321 bp<br>exon 2: TI2045130565: 468-640 bp<br>exon 3: TI2045130565: 722-788 bp                   | -        |
|                | Perissodactyla | Horse                          | EquCab2 (6.79)   | 1 | <i>MIF</i> | exon 1: ch.8: 1557344-1557451 bp                                                                                           | HF564808 |

|            |              |                        |                     |   |            |                                                                                                                                           |          |
|------------|--------------|------------------------|---------------------|---|------------|-------------------------------------------------------------------------------------------------------------------------------------------|----------|
|            |              |                        |                     |   |            | exon 2: ch.8: 1557014-1557186 bp<br>exon 3: ch.8: 1556854-1556920 bp                                                                      |          |
|            |              |                        |                     |   | putative   | exon 1: ch.8: 1479182-1479289 bp<br>exon 2: ch.8: 1478657-1478832 bp<br>exon 3: ch.8: 1477169-1477241 bp                                  | -        |
|            | Carnivora    | Domestic dog           | CanFam3.1 (>7)      | 0 | putative   | exon 1: ch.26: 28522347-28522454 bp<br>exon 2: ch.26: 28521929-28522104 bp<br>exon 3: ch.26: 28520398-28520470 bp                         | -        |
|            |              | Domestic cat           | Felis_catus-6.2 (2) | 1 | <i>DDT</i> | exon 1: ch.D3: 24858601-24858708 bp<br>exon 2: ch.D3: 24858097-24858272 bp<br>exon 3: ch.D3: 24856460-24856532 bp                         | HF564809 |
|            |              |                        |                     |   | putative   | exon 1: ch.D3: 29230481-29230588 bp<br>exon 2: ch.D3: 29230767-29230939 bp<br>exon 3: ch.D3: 29231064-29231130 bp                         | -        |
|            | Chiroptera   | Large flying fox       | pteVam1 (2.63)      | 1 | <i>MIF</i> | exon 1: GeneScaffold_3632: 101208-101315 bp<br>exon 2: GeneScaffold_3632: 101448-101620 bp<br>exon 3: GeneScaffold_3632: 101704-101770 bp | HF564810 |
|            | Eulipotyphla | West European hedgehog | eriEur1 (1.86)      | 1 | <i>DDT</i> | exon 1: GeneScaffold_1299: 23435-23542 bp<br>exon 2: GeneScaffold_1299: 23830-24005 bp<br>exon 3: GeneScaffold_1299: 25249-25321 bp       | HF564811 |
|            |              | Common shrew           | sorAra1 (1.92)      | 0 | putative   | exon 1: GeneScaffold_1025: 41451-41558 bp<br>exon 2: GeneScaffold_1025: 41914-42089 bp<br>exon 3: GeneScaffold_1025: 44651-44723 bp       | -        |
| Xenarthra  | Xenarthra    | Nine-banded armadillo  | dasNov3.0 (6)       | 1 | <i>DDT</i> | exon 1: JH569570.1: 244503-244610 bp<br>exon 2: JH569570.1: 243879-244054 bp<br>exon 3: JH569570.1: 242414-242486 bp                      | HF564812 |
|            |              |                        |                     |   | putative   | exon 1: JH569570.1: 375776-375883 bp<br>exon 2: JH569570.1: 375429-375601 bp<br>exon 3: JH569570.1: 375266-375332 bp                      | -        |
| Afrotheria | Tenrecidae   | Lesser hedgehog tenrec | echTell1 (1.9)      | 1 | <i>MIF</i> | exon 1: scaffold_253136: 540-647 bp<br>exon 2: scaffold_253136: 194-366 bp<br>exon 3: scaffold_253136: 38-109 bp                          | HF564813 |
|            |              |                        |                     |   | putative   | exon 1: scaffold_234745: 876-983 bp<br>exon 2: scaffold_234745: 1117-1292 bp<br>exon 3: scaffold_234745: 3219-3291 bp                     | -        |

|  |             |                       |                |   |            |                                                                                                                      |          |
|--|-------------|-----------------------|----------------|---|------------|----------------------------------------------------------------------------------------------------------------------|----------|
|  | Proboscidea | African bush elephant | loxAfr3 (6.77) | 1 | <i>DDT</i> | exon 1: GL010095.1: 803127-803234 bp<br>exon 2: GL010095.1: 803495-803670 bp<br>exon 3: GL010095.1: 805236-805308 bp | HF564814 |
|  | Hyracoidea  | Rock hyrax            | proCap1 (2.19) | 1 | <i>MIF</i> | exon 1: scaffold_86812: 701-808 bp<br>exon 2: scaffold_86812: 370-542 bp<br>exon 3: scaffold_86812: 213-279 bp       | HF564815 |

<sup>a</sup>, the common names of 35 eutherian species were provided according to Wilson and Reeder (2005); <sup>b</sup>, genomic sequence redundancy was given in brackets; <sup>c</sup>, translated exons; ch., chromosome.
