# Supplementary material for: Initial description of primate-specific cystine-knot Prometheus genes and differential gene expansions of D-dopachrome tautomerase genes
Source: PubMed Central journal article supplement — Meta Gene. 2015 Apr 25;4:118–28. doi: 10.1016/j.mgene.2015.02.005 (PMC4412970; doi:10.1016/j.mgene.2015.02.005), 2015-04-25
Supplement: mmc13.pdf [file mmc13.pdf]

|                                 |   |                                                                            |    |
|---------------------------------|---|----------------------------------------------------------------------------|----|
| <i>Homo sapiens</i> DDT1        | 1 | MPFLELDTNLPANRVPAG-L-EKRLC-AAAASILGKPADRVNVTVRPGLAMALSGSTEPCAQL-SISSIGVVG  | 69 |
| <i>Homo sapiens</i> MIF         | 1 | MPMFIVNTNVPRASVPDGFLSELTQ-QLAQAT--GKPPQYIAVHVVPDQLMAFGGSSEPCA-LCSLHSIGKIG  | 69 |
| <i>Homo sapiens</i> DDT1        | 1 | MPFLELDTNLPANRVPAG-L-EKRLC-AAAASILGKPADRVNVTVRPGLAMALSGSTEPCAQL-SISSIGVVG  | 69 |
| <i>Pan troglodytes</i> DDT1     | 1 | MPFLELDTNLPANRVPAG-L-EKRLC-AAAASILGKPADRVNVTVRPGLAMALSGSTEPCAQL-SISSIGVVG  | 69 |
| <i>Papio hamadryas</i> DDT1     | 1 | MPFVELDTNLPANRVPAG-L-EKRLC-AAAASILGKPADRVNVTVRPGLTMALSGSTEPCAQL-SVSSIGVVG  | 69 |
| <i>Callithrix jacchus</i> DDT1  | 1 | MPFLELDTNLPANRVPAG-L-EKRLC-AAAASILGKPADRVNVTMRPGLAMSLNGSTEPCAQL-SVSSIGVVG  | 69 |
| <i>Homo sapiens</i> DDT2        | 1 | MPFLELDTNLPANRVPAG-L-EKRLC-AAAASILGKPADRVNVTVRPGLAMALSGSTEPCAQL-SISSIGVVG  | 69 |
| <i>Pongo abelii</i> DDT2        | 1 | MPFLELDTNLPANRVPAG-L-EKRLC-AAAASILGKPADRVNVTVRPGLAMALSGSTEPCAQL-SVSSIGVVG  | 69 |
| <i>Homo sapiens</i> DDT3        | 1 | MPFLELHTNFPANRVPAG-L-EKRLC-AVAASILGKPADLVNVTVRPGLARALSGSTEPCAQL-SISSIGVVG  | 69 |
| <i>Pan troglodytes</i> DDT3     | 1 | MPFLELHTNFPANRVPAG-L-EKRLC-AVAASILGKPADLVNVTVRPGLARALSGSTEPCAQL-SISSIGVVG  | 69 |
| <i>Homo sapiens</i> DDT4        | 1 | MPFLELDTNLPANQVPAG-L-EKWLC--ATASILGKPKDHVNMMGVAGLTMVLSRSTEPWAQL-FISSTSMMD  | 68 |
| <i>Pan troglodytes</i> DDT4     | 1 | MPFLELDTNLPANQVPAG-L-EKWLC--ATASILGKPKDHVNMMGVAGLTMVLSRSTEPWVQL-FISSTSMMD  | 68 |
| <i>Nomascus leucogenys</i> DDT4 | 1 | MPFLELDTNLPANQVPAG-P-EKWLC--ATASILGKPKDHVNMTGVAGLTMVLSRPTAPWAQL-FISSTSMMD  | 68 |
| <i>Tupaia belangeri</i> DDT     | 1 | MPFLELDTNLPADRLPAG-L-EKRLC-AAAAAILGKPENRVNVTVRPGLPMAVSGSTEPCAQL-LVSSIGVVG  | 69 |
| <i>Mus musculus</i> Ddt         | 1 | MPFVELETNLPASRIPAG-L-ENRLC-AATATILDKPEDRVSVTIRPGMTLLMNKSTEPCAHL-LVSSIGVVG  | 69 |
| <i>Rattus norvegicus</i> Ddt    | 1 | MPFVELETNLPASRIPAG-L-ENRLC-AATATILDKPEDRVSVTIRPGMTLLMNKSTEPCAHL-LISSIGVVG  | 69 |
| <i>Bos taurus</i> DDT           | 1 | MPFVELDTSLEPAGRVPAG-L-EKRLC-AATAAILSKPEDRVNVTVRSGLAMVVGSAEPSAQL-LVSSIGVVG  | 69 |
| <i>Felis catus</i> DDT          | 1 | MPFVELDTNLPAGRVPAG-L-EKRLC-AATAAILSKPEDRVNVTLRPGLAMAVNGSTDPCAQL-IISSIGVVG  | 69 |
| <i>Erinaceus europaeus</i> DDT  | 1 | MPFVELDTNLPAGSVPAG-L-EKRLC-AATAAAILGKPEDRVNVTVRPGLLMAVNGSAEPCAQL-LVSSIGVVG | 69 |
| <i>Dasypus novemcinctus</i> DDT | 1 | MPFVELDTNLPANLVPAG-L-EKRLC-AAIAAILGKPEDRVNVTLRPGLTMVVSSEPCAQL-LVSSIGVVG    | 69 |
| <i>Loxodonta africana</i> DDT   | 1 | MPFVELDTNLPADRVPAG-L-EKRLC-AATASILGKPEERVNVTVRPGLAMTVNGSSEPCAQL-FVSSIGVVG  | 69 |
| <i>Homo sapiens</i> MIF         | 1 | MPMFIVNTNVPRASVPDGFLSELTQ-QLAQAT--GKPPQYIAVHVVPDQLMAFGGSSEPCA-LCSLHSIGKIG  | 69 |
| <i>Nomascus leucogenys</i> MIF  | 1 | MPMFIVNTNVPRASVPDGFLSELTQ-QLAQAT--GKPPQYIAVHVVPDQLMAFGGSSEPCA-LCSLHSIGKIG  | 69 |
| <i>Papio hamadryas</i> MIF      | 1 | MPMFIVNTNVPRASVPDGFLSELTQ-QLAQAT--GKPPQYIAVHVVPDQLMAFGGSSEPCA-LCSLHSIGKIG  | 69 |
| <i>Otolemur garnettii</i> MIF   | 1 | MPMFVVNTNVPRASVPDGFLSELTQ-QLAQAT--GKPPQYIAVHVVPDQLMAFGGSTEPPCA-LCSLHSIGKIG | 69 |
| <i>Mus musculus</i> Mif         | 1 | MPMFIVNTNVPRASVPEGFLSELTQ-QLAQAT--GKPAQYIAVHVVPDQLMTFSGTNDPCA-LCSLHSIGKIG  | 69 |
| <i>Rattus norvegicus</i> Mif    | 1 | MPMFIVNTNVPRASVPEGFLSELTQ-QLAQAT--GKPAQYIAVHVVPDQLMTFSGTSDPCA-LCSLHSIGKIG  | 69 |
| <i>Bos taurus</i> MIF           | 1 | MPMFVVNTNVPRASVPDGLLSELTQ-QLAQAT--GKPAQYIAVHVVPDQLMTFGGSSEPCA-LCSLHSIGKIG  | 69 |
| <i>Equus caballus</i> MIF       | 1 | MPMFVVNTNVPRASVPDGLLSELTQ-QLVQAT--GKPAQYIAVHVVPDQLMTFGGSSEPCA-LCSLHSIGKIG  | 69 |
| <i>Pteropus vampyrus</i> MIF    | 1 | MPMFVVNTNVSRSVPAGLLSELTQ-QLAQAT--GKPAQYIAVHVVPDQLMAFGGSSEPCA-LCSLHSIGKIG   | 69 |
| <i>Echinops telfairi</i> MIF    | 1 | MPMFVVNTNVPRASVPDGLLSELTQ-QLAQAT--GKPAQYIAVHVVPDQLMVFSGSSEPCA-LCSLHSIGKIG  | 69 |
| <i>Procavia capensis</i> MIF    | 1 | MPMFVVHTNVPRASVPDGLLSELTQ-QLAQAT--GKPAQYIAVLVIPDQLMAFGGSSEPCA-LCSLHSIGKIG  | 69 |

|                                 |    |                                                                         |     |
|---------------------------------|----|-------------------------------------------------------------------------|-----|
| <i>Homo sapiens</i> DDT1        | 70 | TAEDNRSHSAHF-FEFLTKELALGQDR-ILIRFFPLESWQIGKIG-TVMTFE&-----              | 118 |
| <i>Homo sapiens</i> MIF         | 70 | GA-QNRSYSKLLC-GLLAERLRISPDR-VYINYYDMNAANVG--W-NNSTFA&-----              | 115 |
| <i>Homo sapiens</i> DDT1        | 70 | TAEDNRSHSAHF-FEFLTKELALGQDR-ILIRFFPLESWQIGKIG-TVMTFE&-----              | 118 |
| <i>Pan troglodytes</i> DDT1     | 70 | TAEDNRSHSAHF-FEFLTKELALGQDR-ILIRFFPLESWQIGKIG-TVMTFE&-----              | 118 |
| <i>Papio hamadryas</i> DDT1     | 70 | TAEDNRSHSAHF-FEFLTKELALGQDR-ILIRFFPLESWQIGKIG-TVMTFE&-----              | 118 |
| <i>Callithrix jacchus</i> DDT1  | 70 | TAEDNRSHSAHF-FEFLTKELALDQDR-ILIRFFPLEPWQIGKKG-TVMTFE&-----              | 118 |
| <i>Homo sapiens</i> DDT2        | 70 | TAEDNRSHSAHF-FEFLTKELALGQDR-FPTVLSTSPAAGGPR-C-PGEI--IEGKKSCLNEEALFIYFI& | 134 |
| <i>Pongo abelii</i> DDT2        | 70 | TAEDNRSHSAHL-FEFLTKELALGQDR-FPTVLSTSPAAGGPR-C-PGER--TEGAKSCLNEEALFIYFI& | 134 |
| <i>Homo sapiens</i> DDT3        | 70 | TAEDNRSHSAHF-FEFLTKELALGQDRC-AGVVGPEYY-S-KT---QSEY--SIPANS-LKPNT-----&  | 123 |
| <i>Pan troglodytes</i> DDT3     | 70 | TAEDNRSHSAHF-FEFLTKELALGQDRC-AGVVGPEYY-S-KT---QSEY--SIPANS-LKPNT-----&  | 123 |
| <i>Homo sapiens</i> DDT4        | 69 | TTEENRSHSTHF-FEFLTEELALGQDQ-IIFHFSPLEPWQTGKKG-MVITF-&-----              | 116 |
| <i>Pan troglodytes</i> DDT4     | 69 | TTEENCSSHSTHF-FEFLTEELALGQDQ-IIFHFSPLEPWQTGKKG-MVITF-&-----             | 116 |
| <i>Nomascus leucogenys</i> DDT4 | 69 | TTEENRSHSTHF-FEFLTKELALGQDQ-IIFHFYPLEPWQTGKKG-MVITF-&-----              | 116 |
| <i>Tupaia belangeri</i> DDT     | 70 | TAEQNRASASAF-FEFLTKELALGQDR-INIRFFPLEPWQIGKNG-TVMTFE&-----              | 118 |
| <i>Mus musculus</i> Ddt         | 70 | TAEQNRTHSASF-FKFLTEELSLDQDR-IVIRFFPLEAWQIGKKG-TVMTFE&-----              | 118 |
| <i>Rattus norvegicus</i> Ddt    | 70 | TAEQNRSHSSSF-FKFLTEELSLDQDR-IIRFFPLEPWQIGKKG-TVMTFE&-----               | 118 |
| <i>Bos taurus</i> DDT           | 70 | TAEENRGHSARF-FEFLTKELDLAEDR-IMIRFFPLERWQIGKKG-TVMTFE&-----              | 118 |
| <i>Felis catus</i> DDT          | 70 | TAEENRGHSARF-FEFLTKEMGLQDR-IIRFFPLEPWQIGKKG-TVMTFE&-----                | 118 |
| <i>Erinaceus europaeus</i> DDT  | 70 | TAEENRGHSARL-FEFLTKELKLGQDR-IVVRFYPVEPWQIGKKG-TVMTFE&-----              | 118 |
| <i>Dasypus novemcinctus</i> DDT | 70 | TAEENRDHSARL-FEFLTKELSLGQDR-IIRFLPLEPWQIGKKG-TVMTFE&-----               | 118 |
| <i>Loxodonta africana</i> DDT   | 70 | TAEENRGHSAQF-FEFLTKELPLGQDR-IIRFFPLELWQIGKKG-TVMTFE&-----               | 118 |
| <i>Homo sapiens</i> MIF         | 70 | GA-QNRSYSKLLC-GLLAERLRISPDR-VYINYYDMNAANVG--W-NNSTFA&-----              | 115 |
| <i>Nomascus leucogenys</i> MIF  | 70 | SA-QNRSYSKLLC-GLLAERLRISPDR-VYINYYDMNAANVG--W-NNSTFA&-----              | 115 |
| <i>Papio hamadryas</i> MIF      | 70 | GA-QNRSYSKLLC-GLLAERLRISPDR-VYINYYDMNAANVG--W-NNSTFA&-----              | 115 |
| <i>Otolemur garnettii</i> MIF   | 70 | GT-QNRSYSKLLC-GLLAERLRISPDR-VYINFFDMNAANVG--W-NNAFTA&-----              | 115 |
| <i>Mus musculus</i> Mif         | 70 | GA-QNRNYSKLLC-GLLSDRLHISPDR-VYINYYDMNAANVG--W-NGSTFA&-----              | 115 |
| <i>Rattus norvegicus</i> Mif    | 70 | GA-QNRNYSKLLC-GLLSDRLHISPDR-VYINYYDMNAANVG--W-NGSTFA&-----              | 115 |
| <i>Bos taurus</i> MIF           | 70 | GA-QNRSYSKLLC-GLLTERLRISPDR-IYINFCMNAANVG--W-NGSTFA&-----               | 115 |
| <i>Equus caballus</i> MIF       | 70 | GA-QNRSYSKLLC-GLLAERLRVSPDR-IYINYYDMNAANVG--W-NGSTFA&-----              | 115 |
| <i>Pteropus vampyrus</i> MIF    | 70 | GP-QNRSYSKLLC-GLLAERLRISPDR-IYINYYDMNAAYVG--W-NGSTFA&-----              | 115 |
| <i>Echinops telfairi</i> MIF    | 70 | GA-QNRTYSKLLC-GLLAERLRISPDR-IYINYYDMNAANVG--W-NGSTFA&-----              | 115 |
| <i>Procavia capensis</i> MIF    | 70 | GP-QNRAYSKLLC-GLLAERLRISPDR-IYINYYDMNAANVG--W-NSSFTA&-----              | 115 |
