# Supplementary figures and images for: Initial description of primate-specific cystine-knot Prometheus genes and differential gene expansions of D-dopachrome tautomerase genes
Source: PubMed Central journal article supplement — Meta Gene. 2015 Apr 25;4:118–28. doi: 10.1016/j.mgene.2015.02.005 (PMC4412970; doi:10.1016/j.mgene.2015.02.005), 2015-04-25

**A**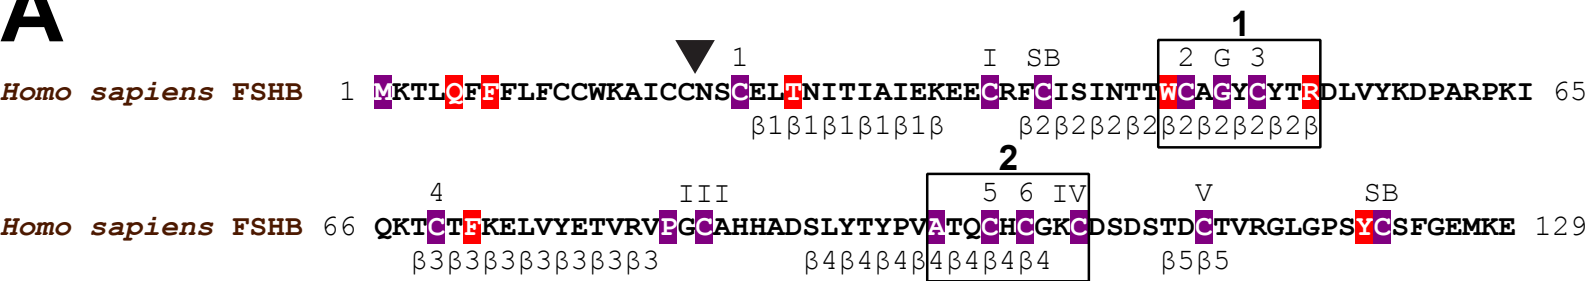**B**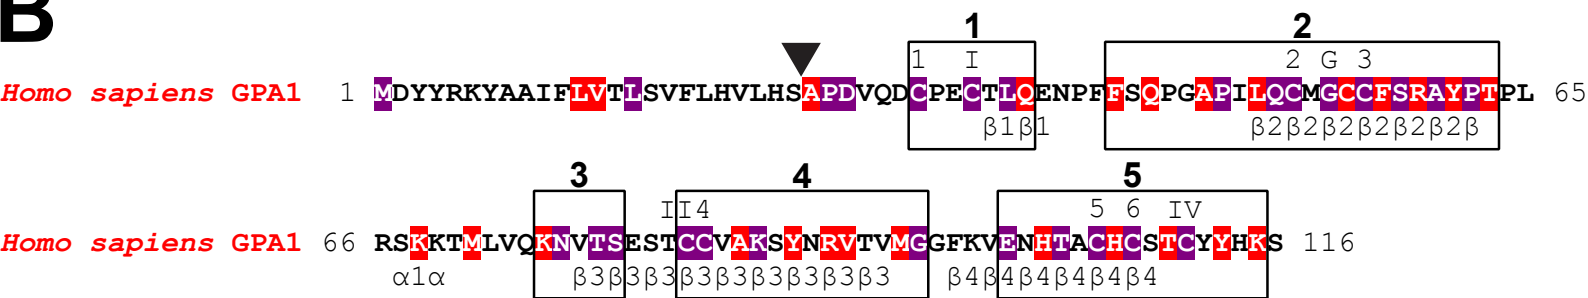**C**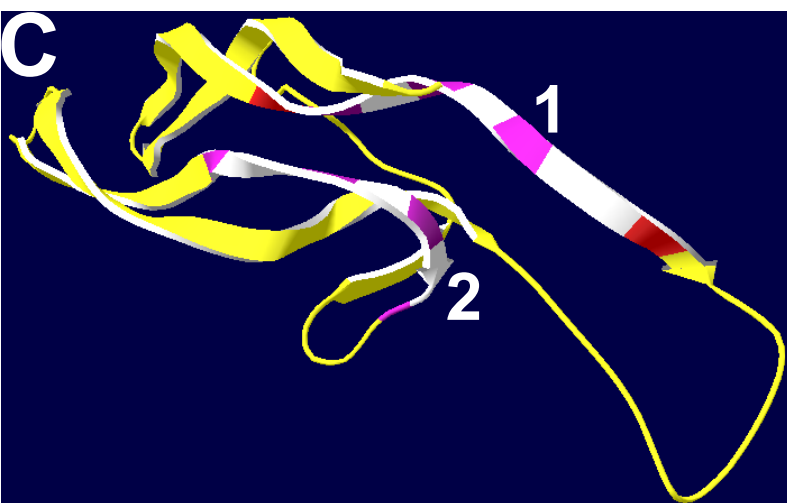**D**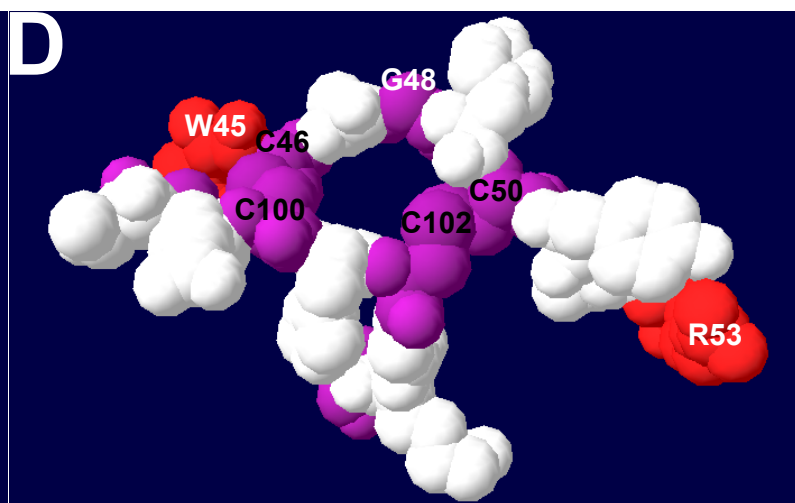**E**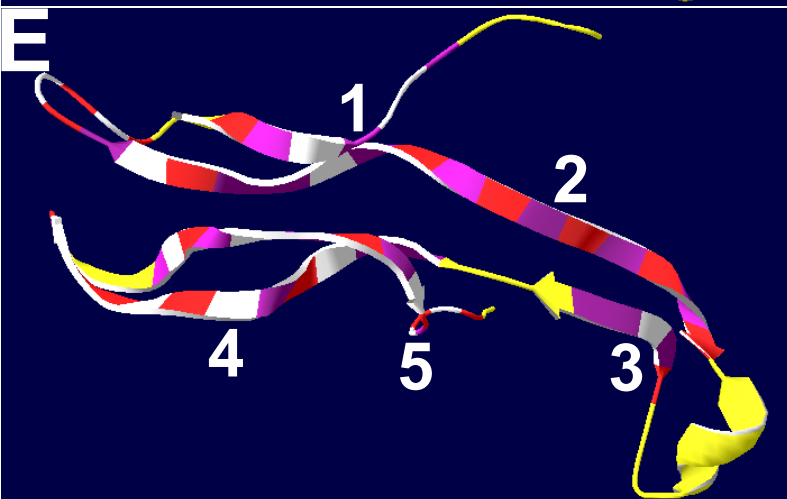**F**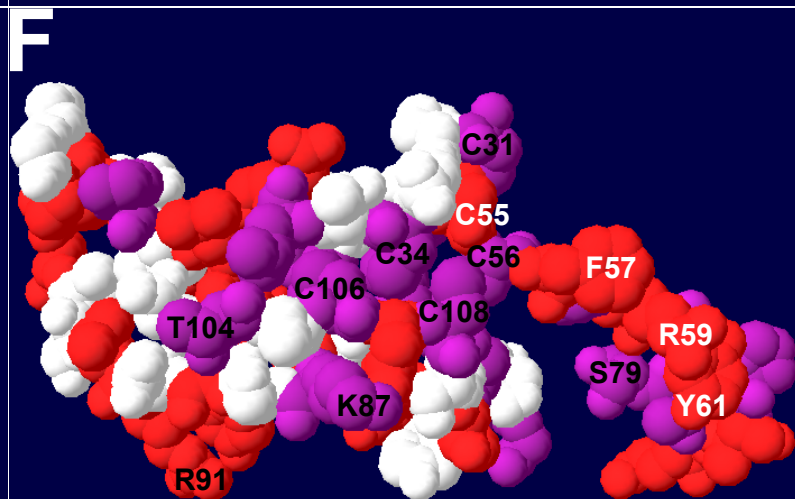

Supplement: mmc10.pdf [file mmc10.pdf]

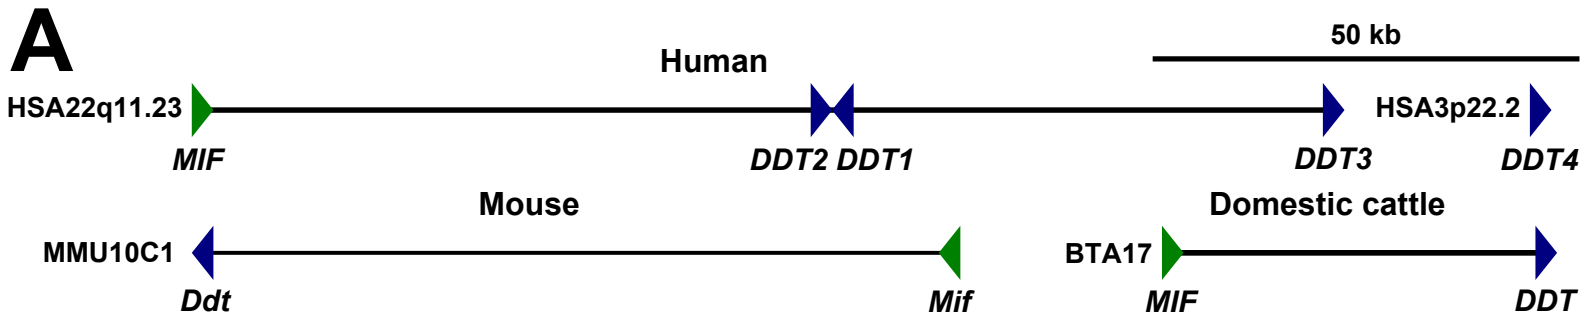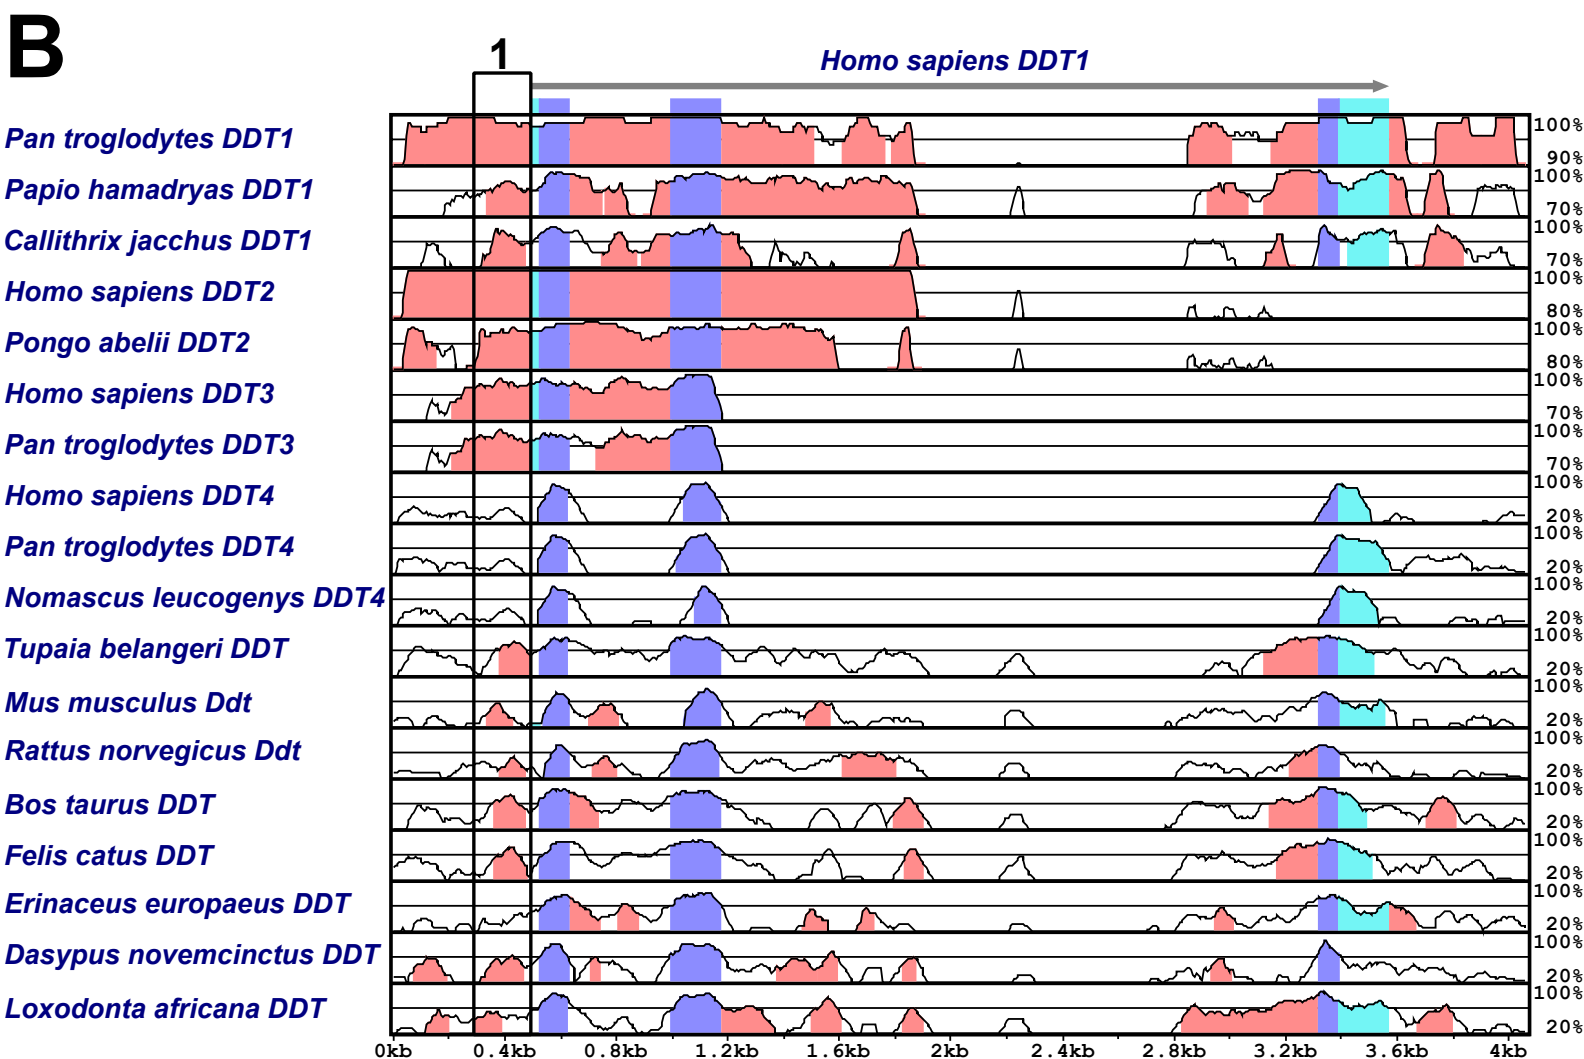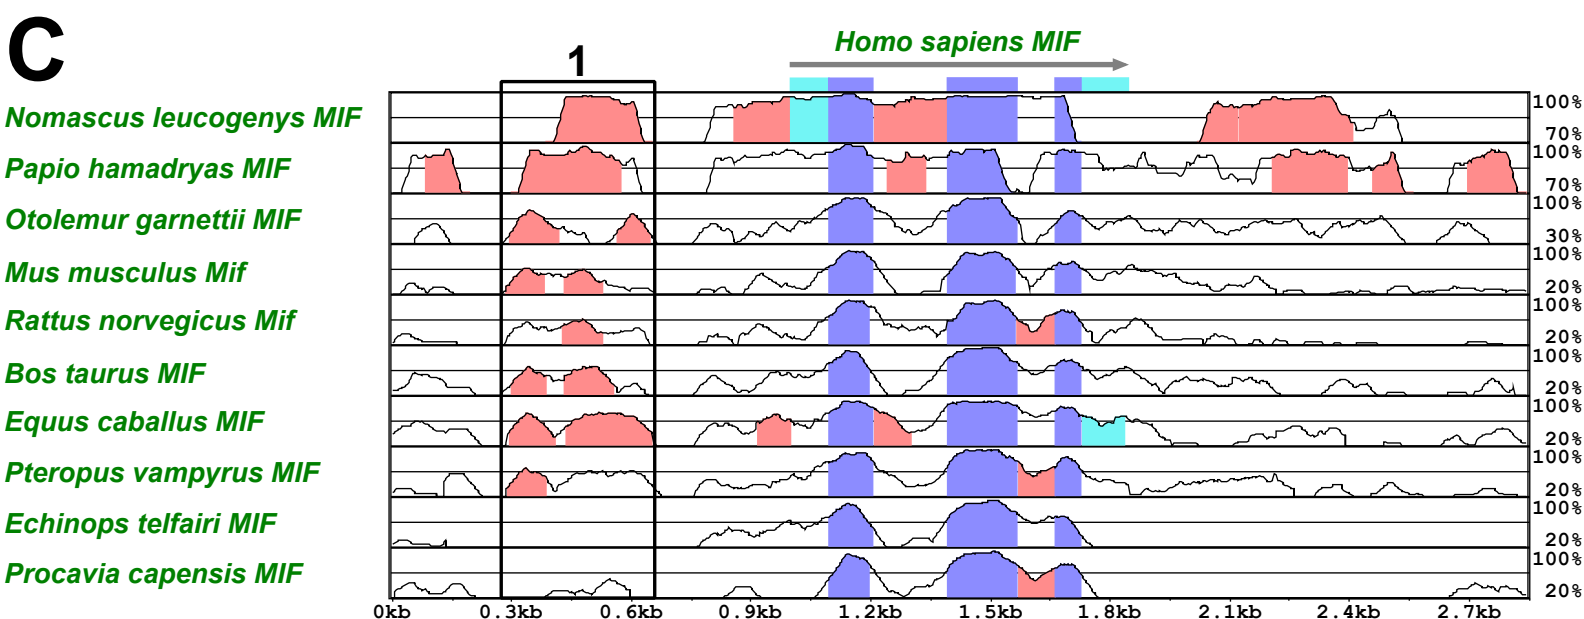

Supplement: mmc12.pdf [file mmc12.pdf]

**A***Homo sapiens* PREA2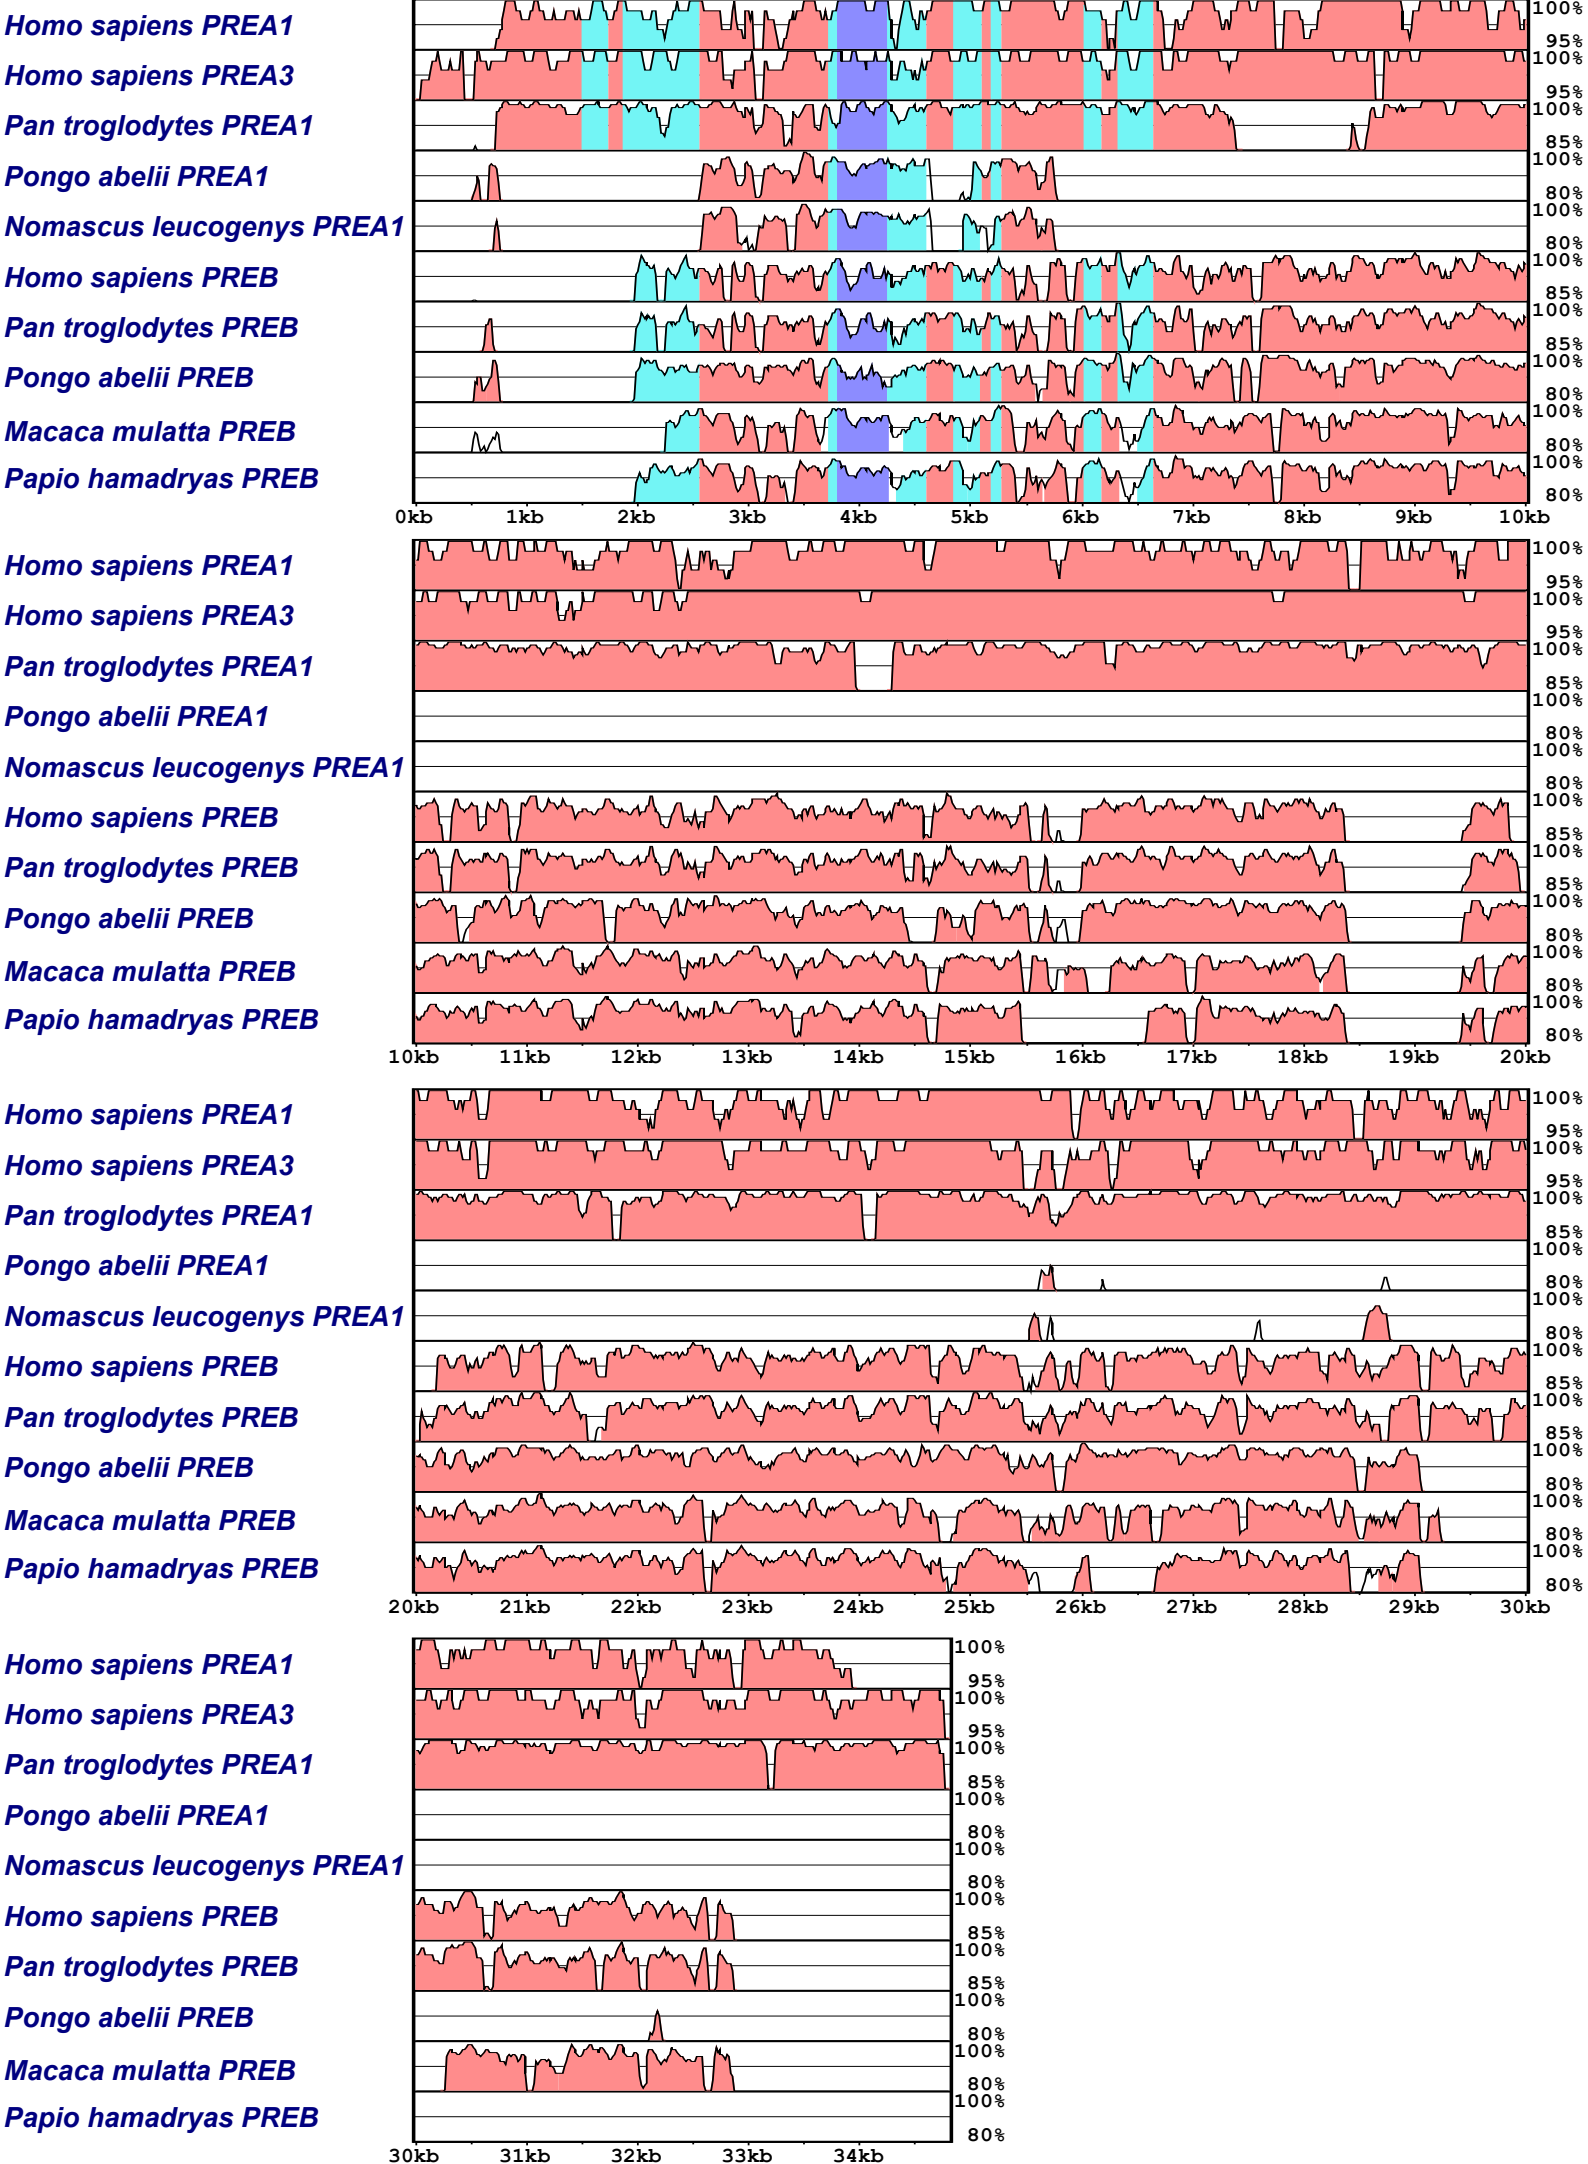

Supplement: mmc3.pdf [file mmc3.pdf]

**B**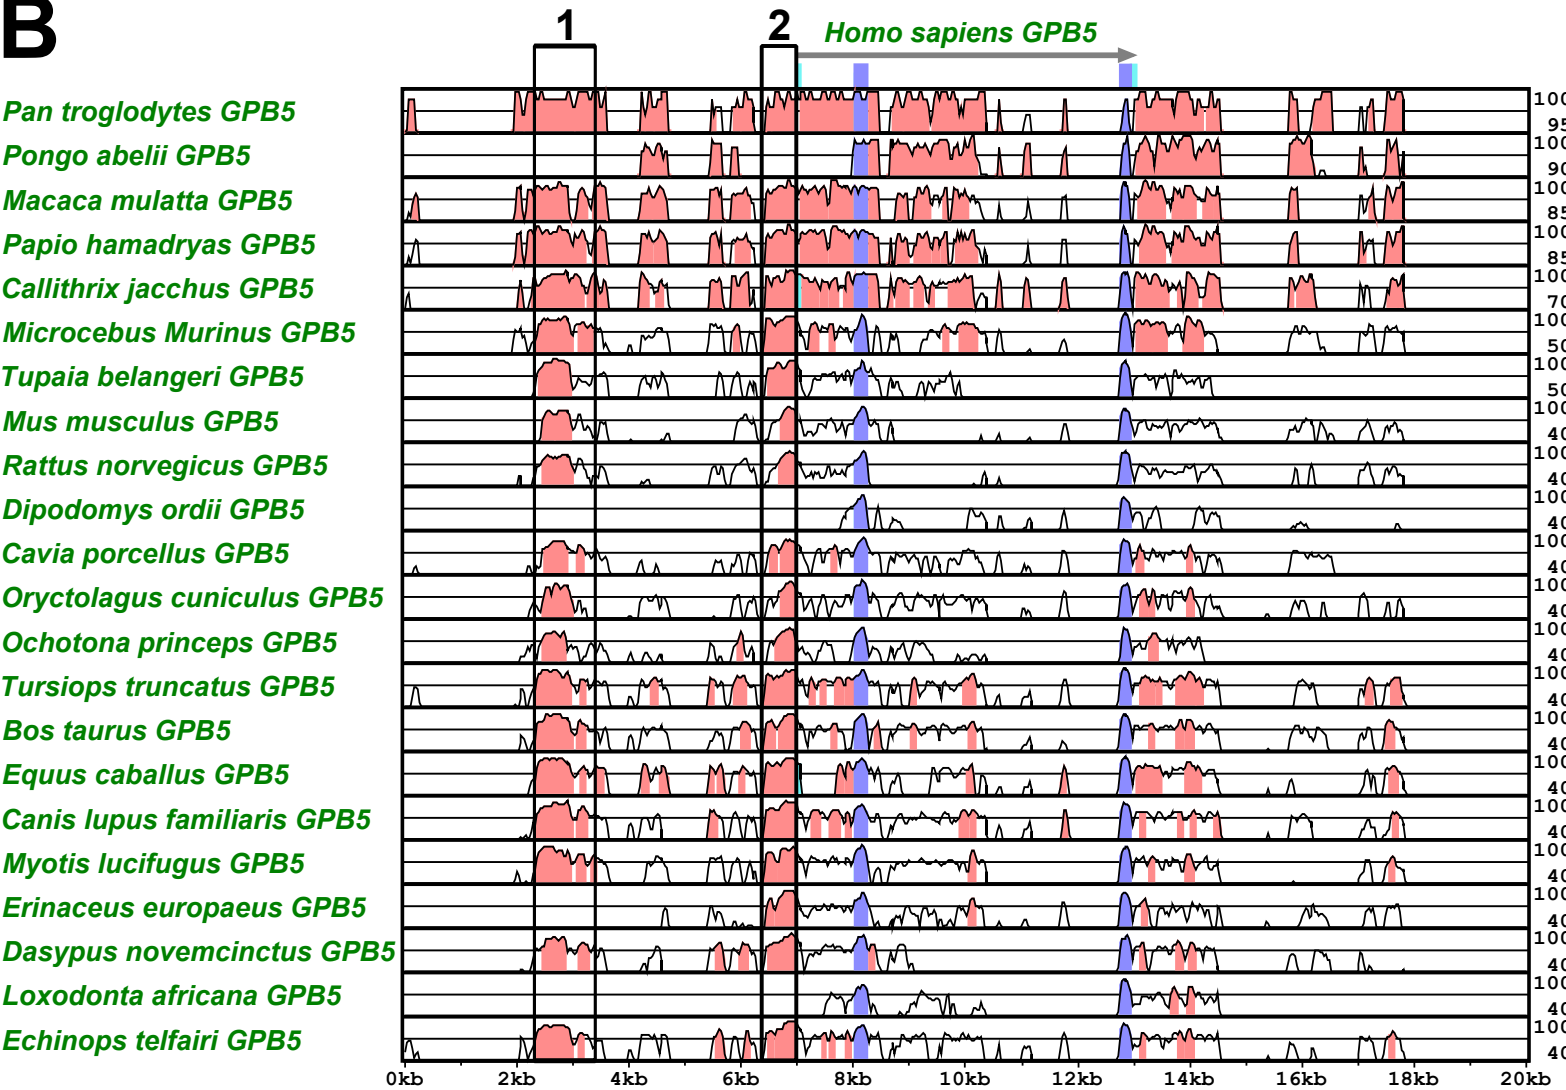**C**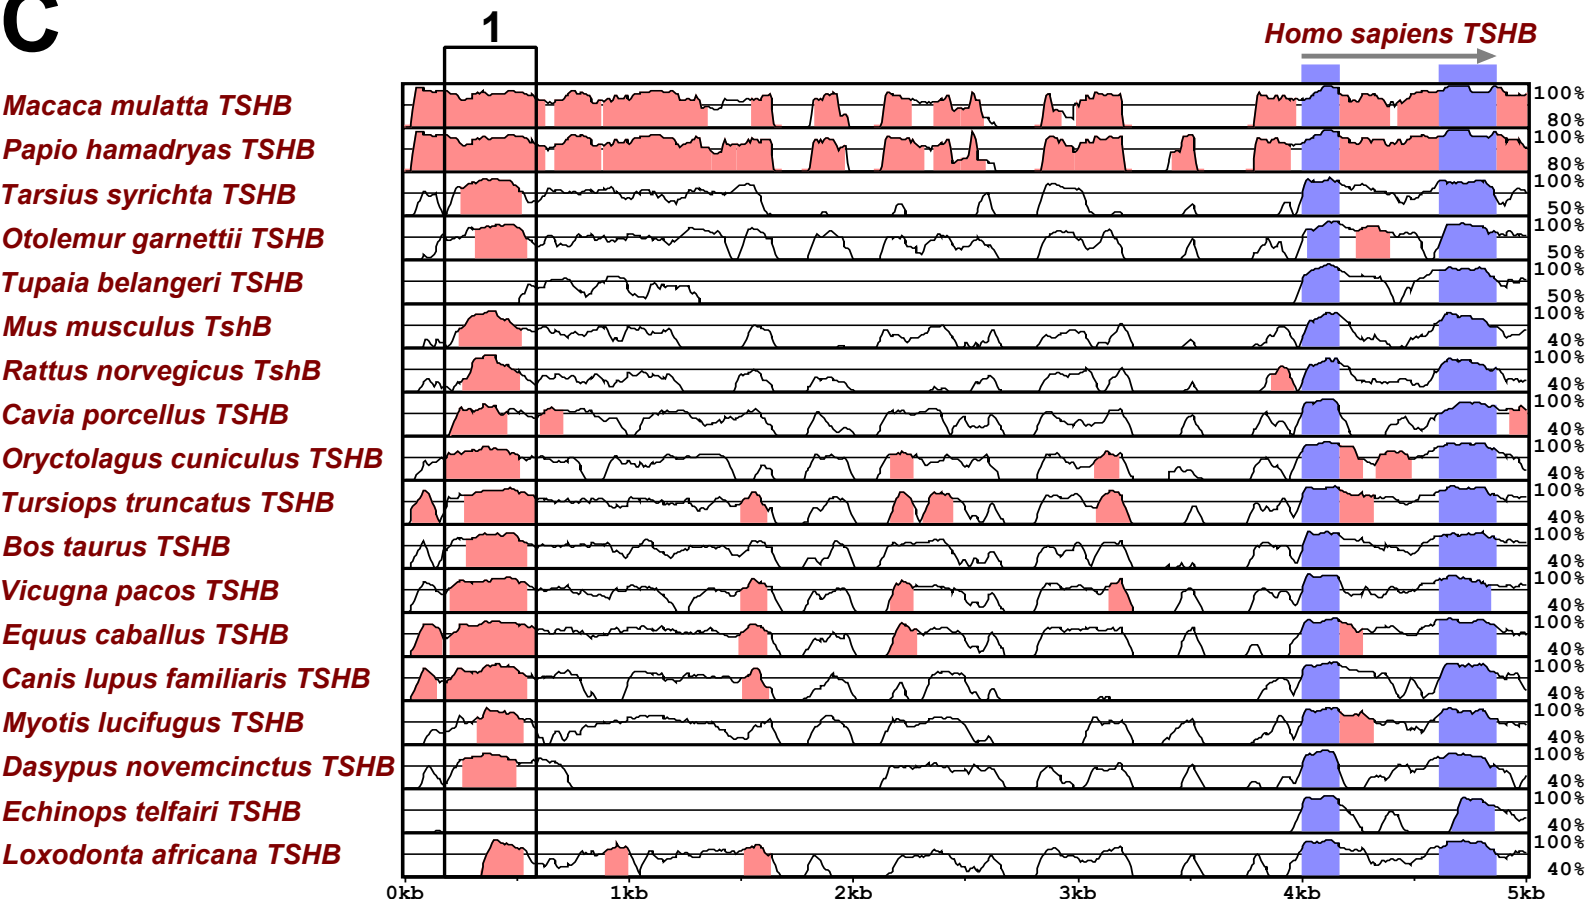

Supplement: mmc4.pdf [file mmc4.pdf]

**D**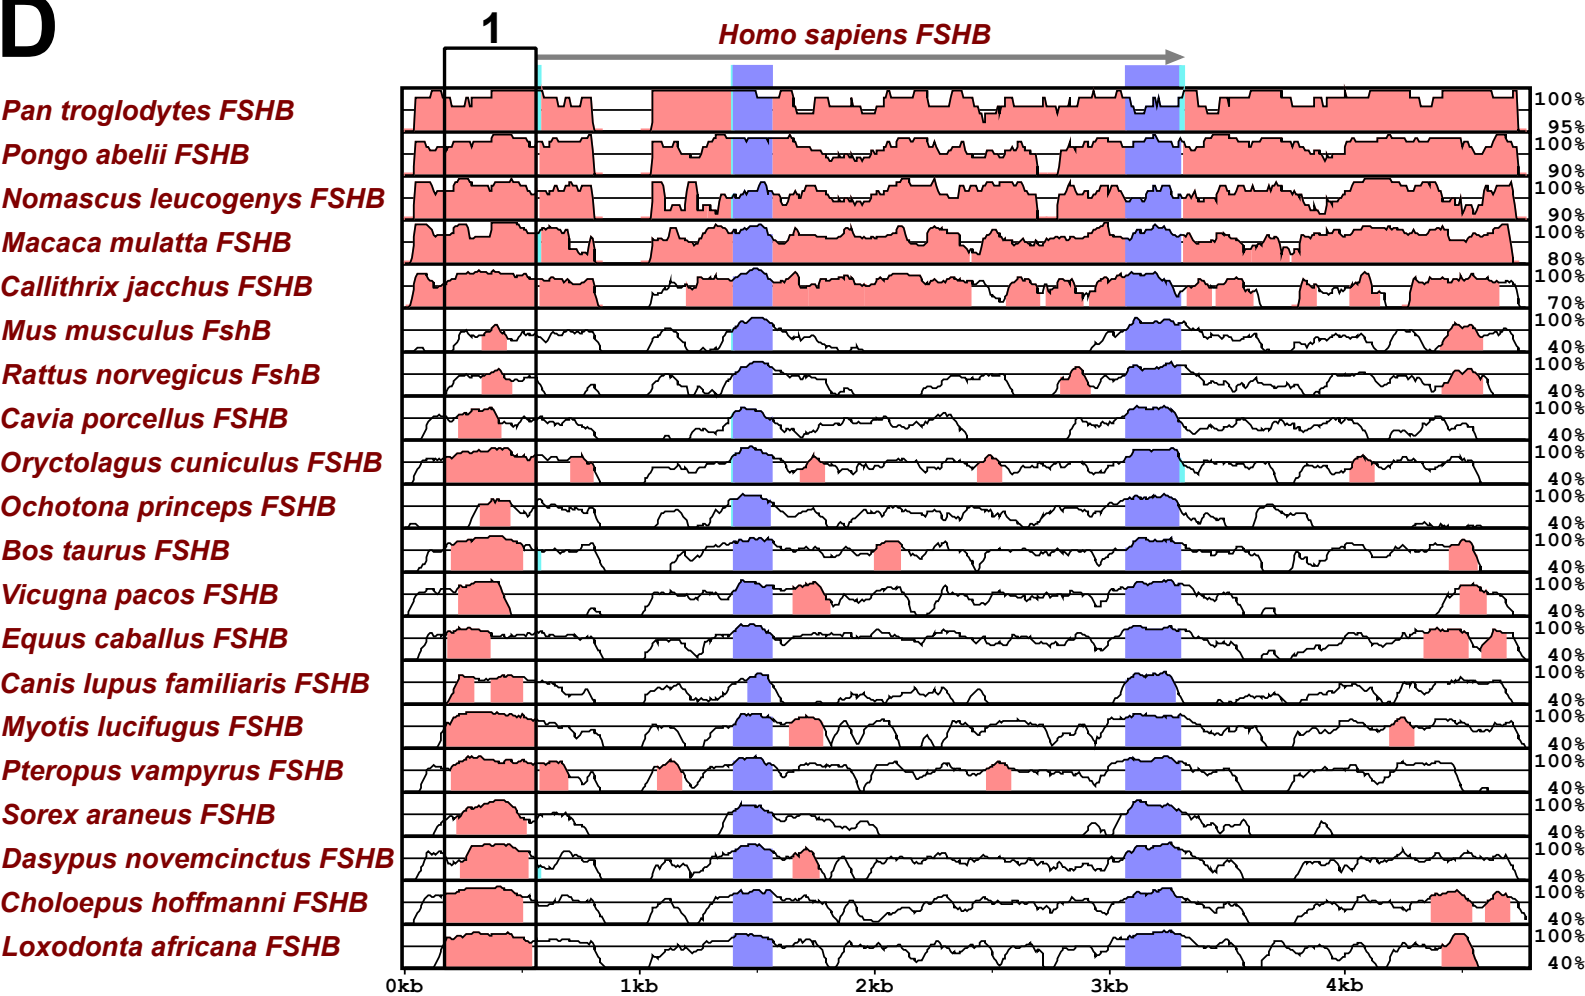**E**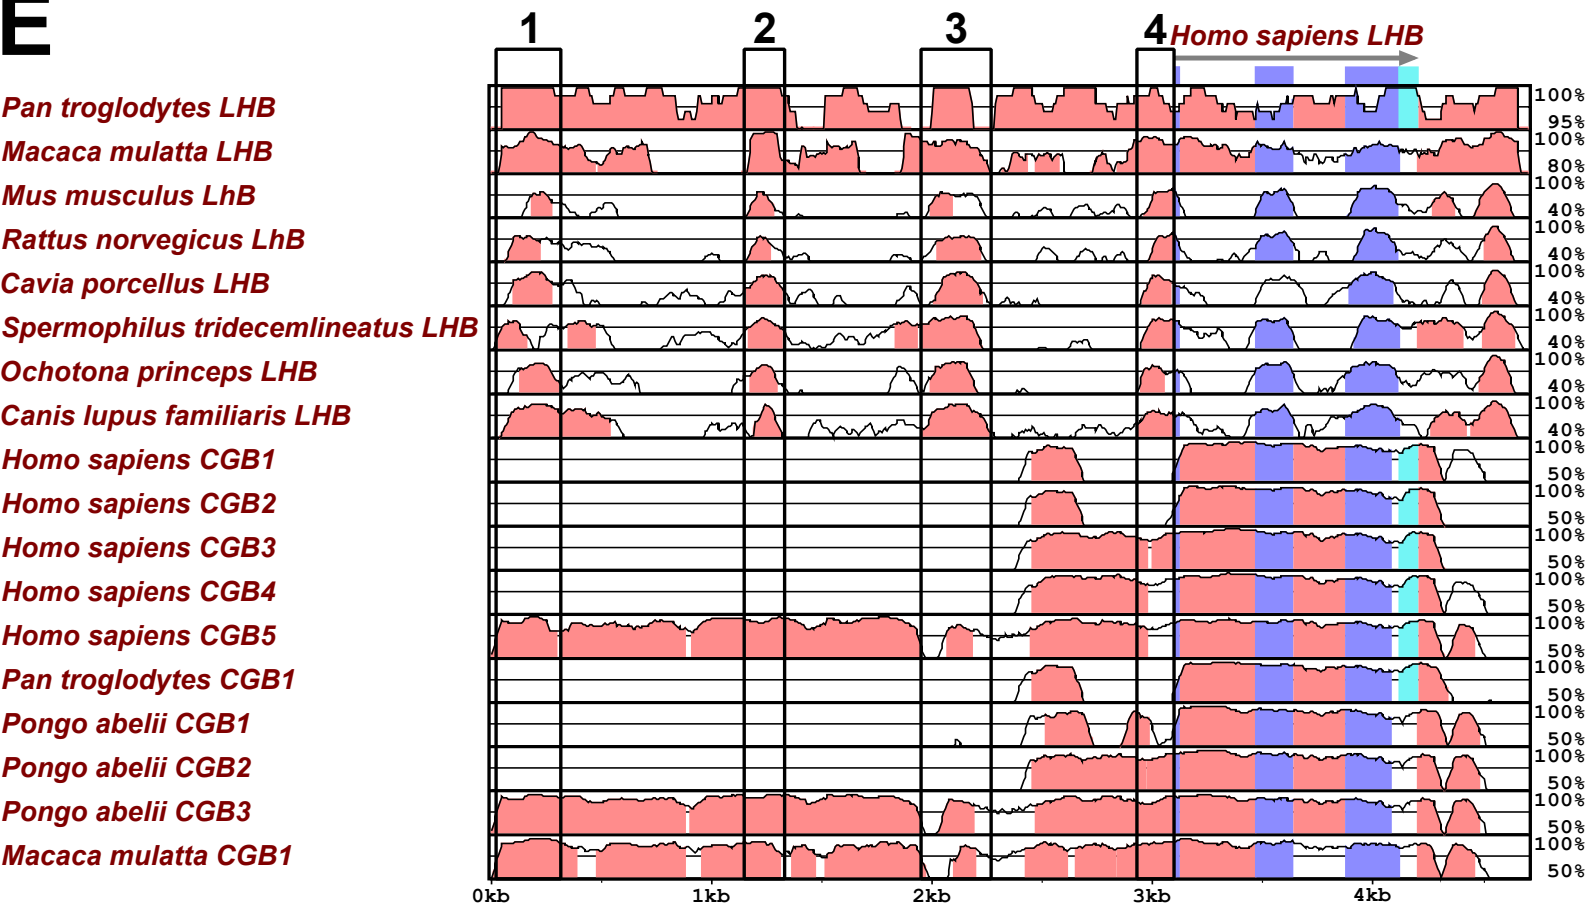

Supplement: mmc5.pdf [file mmc5.pdf]

**F**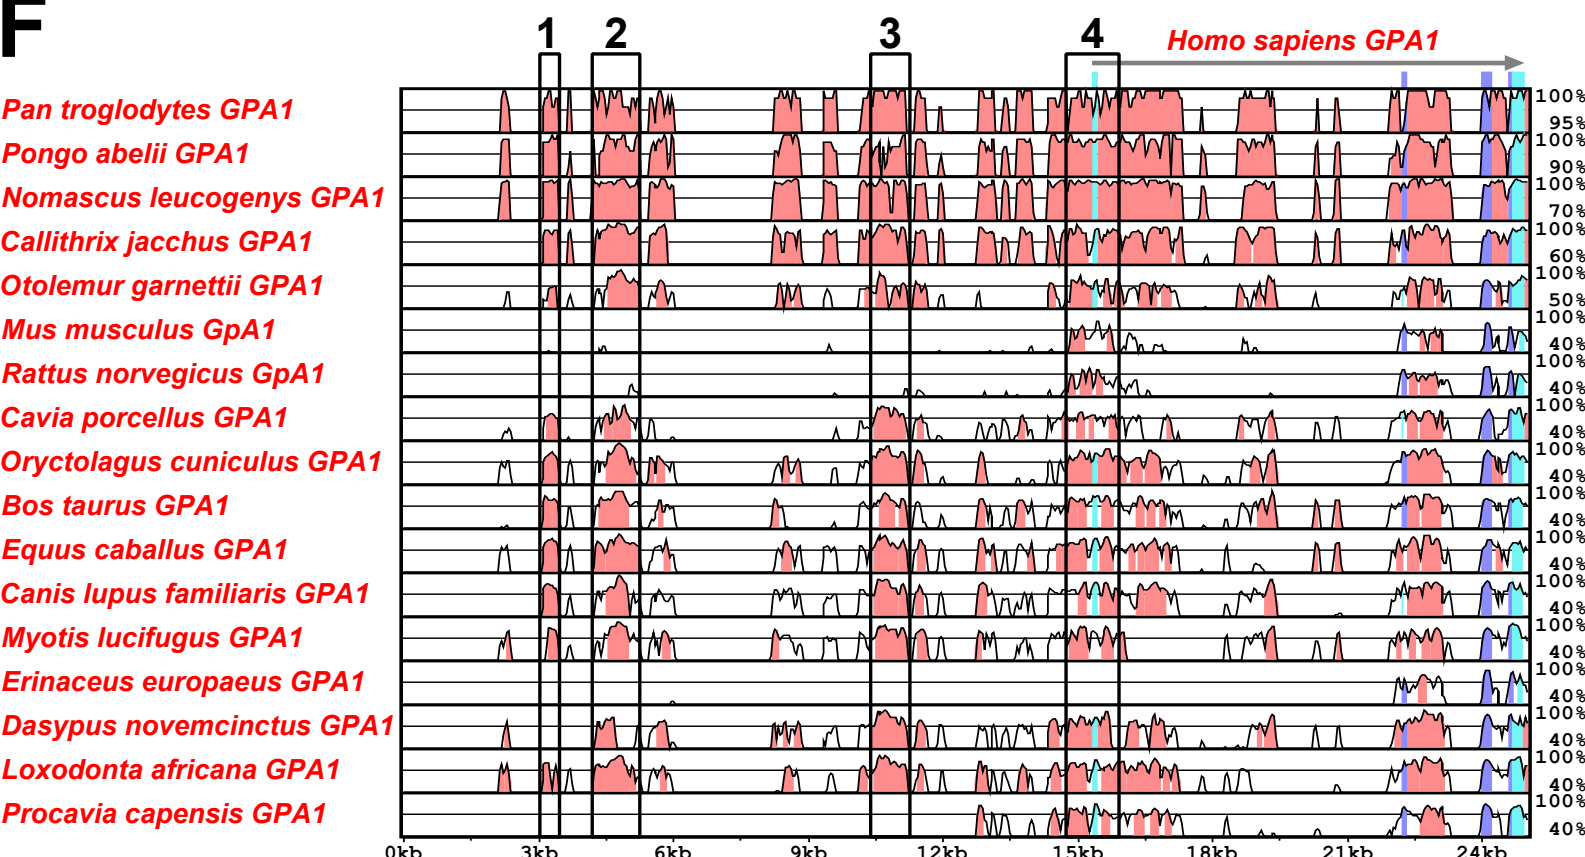**G**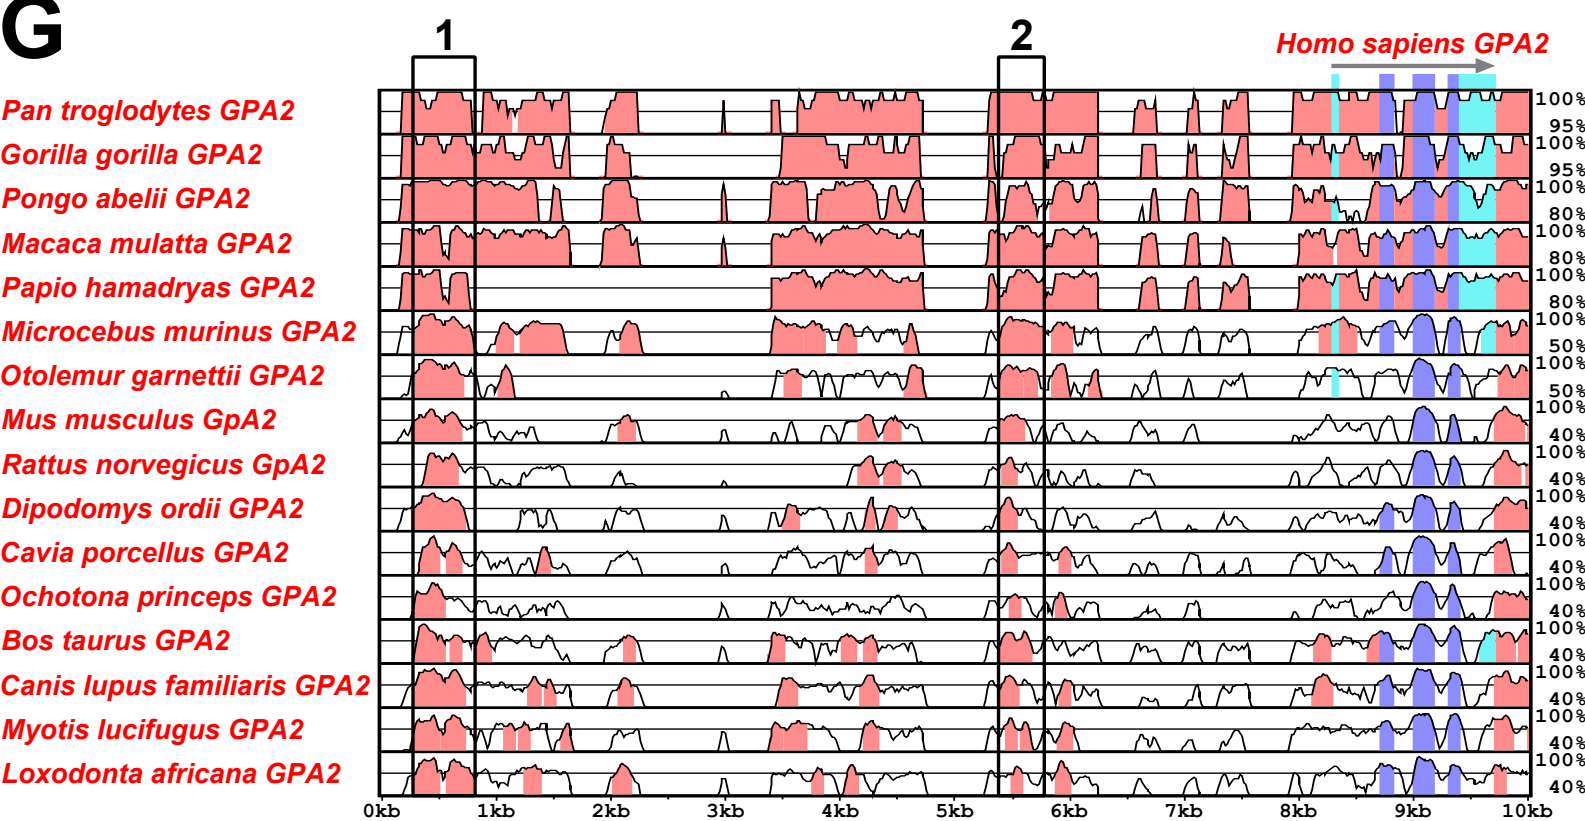

Supplement: mmc6.pdf [file mmc6.pdf]
